# Supplementary material for: Synergistic Pd/Cu-catalysed regio- and stereoselective borylation of allenylic carbonates
Source: Royal Society of Chemistry journal article supplement (doi:10.1039/d1cc05854a), 2021-12-16

Supporting information

**Synergistic Pd/Cu-catalysed regio- and stereoselective borylation of allenyllic carbonates**

Wei-Dong Zhang, Jia-Yu Zou, Qin Zhong\*, Shi-Sen Li, Jian Zhao\*

Department of Chemical Engineering, School of Chemistry and Chemical Engineering, Nanjing University of Science and Technology, Nanjing 210094, China.

Email: [zq304@njust.edu.cn](mailto:zq304@njust.edu.cn); [jzhao@njust.edu.cn](mailto:jzhao@njust.edu.cn)

## Table of Contents

|                                                                             |     |
|-----------------------------------------------------------------------------|-----|
| 1. General information                                                      | S1  |
| 2. Materials                                                                | S1  |
| 3. Detailed optimization of reaction conditions: Table S1                   | S2  |
| 4. Experimental procedures and analytical data of compounds <b>1</b>        | S3  |
| 5. Experimental procedures and analytical data of compounds <b>3</b>        | S8  |
| 6. Determination of the stereochemistry of <b>3n</b> using a NOESY spectrum | S15 |
| 7. References                                                               | S16 |
| 8. NMR spectra of compounds <b>1</b> and <b>3</b>                           | S17 |

**General Information.**  $^1\text{H}$  NMR and  $^{13}\text{C}$  NMR spectra were recorded on BRUKER AVANCE III (500 MHz) spectrometers.  $^{11}\text{B}$  NMR spectra were recorded on BRUKER AVANCE III (400 MHz).  $^1\text{H}$  NMR spectra are reported as follows: chemical shift in ppm ( $\delta$ ) relative to the chemical shift of  $\text{CDCl}_3$  at 7.26 ppm, integration, multiplicities (s = singlet, d = doublet, t = triplet, m = multiplet, appt = apparently triplet), and coupling constants (Hz).  $^{13}\text{C}$  NMR spectra were recorded on BRUKER AVANCE III (126MHz) spectrometers with complete proton decoupling, and chemical shift reported in ppm ( $\delta$ ) relative to the central line of triplet for  $\text{CDCl}_3$  at 77.0 ppm.  $^{11}\text{B}$  NMR chemical shifts were quoted relative to  $\text{BF}_3\cdot\text{Et}_2\text{O}$  as external standard. High-resolution mass spectra (HRMS) were obtained on a BRUKER autoflex maX MALDI-TOF(TOF) instrument. Column chromatography and filtration via silica plug were carried out employing silica gel (Qingdao Haiyang Chem, neutral, 300-400 Mesh). Analytical thin-layer chromatography (TLC) was performed on 0.2 mm precoated plate Kieselgel 60 F254 (Merck).

**Materials.** Unless otherwise noted, commercially available chemicals were used as received. The products **3e** and **3k** were unambiguously confirmed by  $^1\text{H}$ - and  $^{13}\text{C}$  NMR comparing with the reported literature.<sup>1</sup> The structures of new products were determined by  $^1\text{H}$ ,  $^{13}\text{C}$ ,  $^{11}\text{B}$  NMR, and high-resolution mass.

**Table S1. Detailed optimization of reaction conditions<sup>a</sup>**

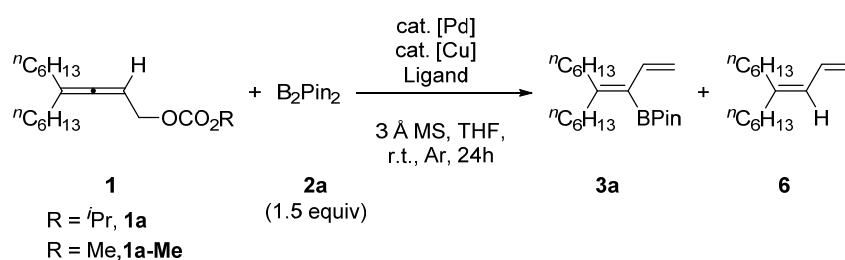

| Entry             | <b>1</b>     | [Pd]/<br>2.5 mol%                | [Cu]/<br>5 mol%        | Ligand/<br>15 mol%                                            | Conversion of <b>1</b><br>/ % <sup>b</sup> | Yield of <b>3a</b><br>/ % <sup>b</sup> | Yield of <b>6</b><br>/ % <sup>b</sup> |
|-------------------|--------------|----------------------------------|------------------------|---------------------------------------------------------------|--------------------------------------------|----------------------------------------|---------------------------------------|
| 1                 | <b>1a</b>    | Pd <sub>2</sub> dba <sub>3</sub> | CuI                    | PPh <sub>3</sub>                                              | 100                                        | 50                                     | 18                                    |
| 2                 | <b>1a</b>    | Pd <sub>2</sub> dba <sub>3</sub> | CuI                    | P(2-furyl) <sub>3</sub>                                       | 89                                         | 61                                     | 12                                    |
| 3                 | <b>1a</b>    | Pd <sub>2</sub> dba <sub>3</sub> | CuI                    | P(C <sub>6</sub> H <sub>4</sub> - <i>p</i> -OMe) <sub>3</sub> | 100                                        | 29                                     | 7                                     |
| 4 <sup>c</sup>    | <b>1a</b>    | Pd <sub>2</sub> dba <sub>3</sub> | CuI                    | dppbz                                                         | 60                                         | 34                                     | 19                                    |
| 5 <sup>c</sup>    | <b>1a</b>    | Pd <sub>2</sub> dba <sub>3</sub> | CuI                    | dppe                                                          | 92                                         | 49                                     | 43                                    |
| 6                 | <b>1a</b>    | Pd <sub>2</sub> dba <sub>3</sub> | CuI                    | P(OMe) <sub>3</sub>                                           | 100                                        | 81                                     | 11                                    |
| 7                 | <b>1a</b>    | Pd <sub>2</sub> dba <sub>3</sub> | CuI                    | P(OEt) <sub>3</sub>                                           | 100                                        | 86 (71)                                | 7                                     |
| 8                 | <b>1a</b>    | Pd <sub>2</sub> dba <sub>3</sub> | CuI                    | P(O <sup><i>i</i></sup> Pr) <sub>3</sub>                      | 100                                        | 78                                     | 20                                    |
| 9                 | <b>1a</b>    | Pd <sub>2</sub> dba <sub>3</sub> | CuI                    | P(OPh) <sub>3</sub>                                           | 64                                         | 19                                     | 2                                     |
| 10 <sup>d</sup>   | <b>1a</b>    | PdCl <sub>2</sub>                | CuI                    | P(OEt) <sub>3</sub>                                           | 11                                         | 0                                      | 0                                     |
| 11 <sup>d</sup>   | <b>1a</b>    | Pd(OAc) <sub>2</sub>             | CuI                    | P(OEt) <sub>3</sub>                                           | 100                                        | 5                                      | 13                                    |
| 12                | <b>1a</b>    | Pd <sub>2</sub> dba <sub>3</sub> | CuCl                   | P(OEt) <sub>3</sub>                                           | 100                                        | 15                                     | 5                                     |
| 13                | <b>1a</b>    | Pd <sub>2</sub> dba <sub>3</sub> | CuCN                   | P(OEt) <sub>3</sub>                                           | 87                                         | 6                                      | 2                                     |
| 14 <sup>e</sup>   | <b>1a</b>    | Pd <sub>2</sub> dba <sub>3</sub> | CuI                    | P(OEt) <sub>3</sub>                                           | 100                                        | 9                                      | 24                                    |
| 15 <sup>f</sup>   | <b>1a</b>    | Pd <sub>2</sub> dba <sub>3</sub> | CuI                    | P(OEt) <sub>3</sub>                                           | 100                                        | 43                                     | 11                                    |
| 16 <sup>g</sup>   | <b>1a</b>    | Pd <sub>2</sub> dba <sub>3</sub> | CuI                    | P(OEt) <sub>3</sub>                                           | 25                                         | 14                                     | 4                                     |
| 17 <sup>h</sup>   | <b>1a</b>    | Pd <sub>2</sub> dba <sub>3</sub> | CuI                    | P(OEt) <sub>3</sub>                                           | 100                                        | 21                                     | 18                                    |
| 18 <sup>i</sup>   | <b>1a</b>    | Pd <sub>2</sub> dba <sub>3</sub> | CuI                    | P(OEt) <sub>3</sub>                                           | 100                                        | 83                                     | 10                                    |
| 19 <sup>j</sup>   | <b>1a</b>    | Pd <sub>2</sub> dba <sub>3</sub> | CuI                    | P(OEt) <sub>3</sub>                                           | 100                                        | 40                                     | 20                                    |
| 20 <sup>k</sup>   | <b>1a</b>    | Pd <sub>2</sub> dba <sub>3</sub> | -                      | P(OEt) <sub>3</sub>                                           | 6                                          | 0                                      | 0                                     |
| 21 <sup>k</sup>   | <b>1a</b>    | -                                | CuI                    | P(OEt) <sub>3</sub>                                           | 4                                          | 0                                      | 0                                     |
| 22 <sup>k,l</sup> | <b>1a</b>    | -                                | CuI/<br><i>t</i> -BuOK | P(OEt) <sub>3</sub>                                           | 10                                         | 7                                      | 1                                     |
| 23                | <b>1a-Me</b> | Pd <sub>2</sub> dba <sub>3</sub> | CuI                    | P(OEt) <sub>3</sub>                                           | 100                                        | 79                                     | 9                                     |

<sup>a</sup> General reaction condition: a mixture of **1** (0.2 mmol), B<sub>2</sub>Pin<sub>2</sub> (**2a**, 0.3 mmol, 1.5 equiv), Pd catalyst (2.5 mol%), Cu catalyst (5 mol%), Ligand (15 mol%) and 3 Å MS in THF (0.1 M, 2 mL) was reacted at r.t. for 24 h under Ar. <sup>b</sup> The conversions of **1** and yields of **3a/6** were determined by crude <sup>1</sup>H NMR spectrum with naphthalene as an internal standard, the yield of isolated **3a** is given in parentheses. <sup>c</sup> 10 mol% ligand was used in the reaction. <sup>d</sup> 5 mol% Pd catalyst was used in the reaction. <sup>e</sup> Toluene was used in the reaction. <sup>f</sup> 1,4-Dioxane was used in the reaction. <sup>g</sup> The reaction was carried out at 0 °C. <sup>h</sup> The reaction was carried out at 50 °C. <sup>i</sup> 3 Å MS was omitted in the reaction. <sup>j</sup> 10 μL water was added in the reaction. <sup>k</sup> 10 mol% P(OEt)<sub>3</sub> was used in the reaction. <sup>l</sup> 10 mol% *t*-BuOK was used in the reaction. dppbz = 1,2 - bis(diphenylphosphino)benzene. dppe = 1,2 - bis(diphenylphosphino)ethane.

## Experimental Procedures and Spectral Data

### 1. Synthesis of Allenylic Carbonates **1**

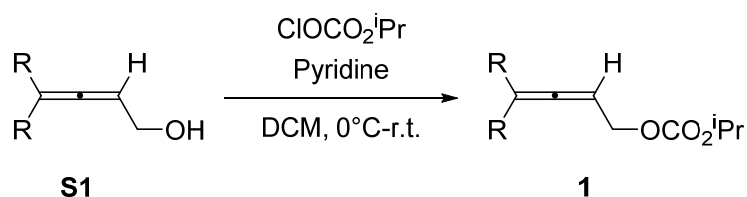

The allenylic carbonates **1** were synthesized according to reported procedures by Glorius and co-workers.<sup>2</sup> To a round bottom-flask equipped with a Teflon coated stirrer bar were added 2,3-allenol (**S1**, 1.0 equiv), pyridine (3.0 equiv) and dichloromethane (0.25 M) under Ar atmosphere. The mixture was cooled to 0 °C and the isopropyl chloroformate (2.0 equiv) was slowly added via syringe. The reaction was allowed to stir at room temperature until completion (monitored by TLC). The mixture was diluted with dichloromethane and washed successively with saturated NH<sub>4</sub>Cl solution and brine. The organic phase was dried over MgSO<sub>4</sub>, filtered and evaporated under reduced pressure. Then, the residue was purified by flash column chromatography using a mixture of petroleum ether/EtOAc as eluent to yield the desired products **1**.

#### 4-Hexyldeca-2,3-dien-1-yl isopropyl carbonate (**1a**)

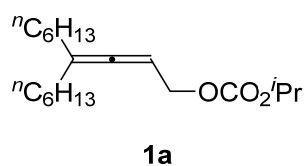

Yield, 86%. Colorless oil. NMR data: <sup>1</sup>H NMR (500 MHz, CDCl<sub>3</sub>) δ 5.30-5.20 (m, 1H), 4.87 (septet, *J* = 6.3 Hz, 1H), 4.55 (d, *J* = 6.8 Hz, 2H), 1.98-1.88 (m, 4H), 1.44-1.34 (m, 4H), 1.34-1.21 (m, 18H), 0.88 (t, *J* = 6.7 Hz, 6H); <sup>13</sup>C NMR (126 MHz, CDCl<sub>3</sub>) δ 202.8, 154.5, 106.7, 87.1, 71.7, 66.6, 32.2, 31.6, 28.9, 27.4, 22.6, 21.7, 14.0; HRMS (ESI): *m/z* calcd. for [C<sub>20</sub>H<sub>36</sub>O<sub>3</sub>Na]<sup>+</sup> 347.25567, found 347.25470.

#### Isopropyl (4-propylhepta-2,3-dien-1-yl) carbonate (**1b**)

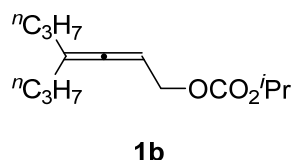

Yield, 81%. Colorless oil. NMR data: <sup>1</sup>H NMR (500 MHz, CDCl<sub>3</sub>) δ 5.30-5.23 (m, 1H), 4.87 (septet, *J* = 6.3 Hz, 1H), 4.56 (d, *J* = 6.8 Hz, 2H), 1.92 (appt, *J* = 7.3 Hz, 4H), 1.43 (tq, *J* = 7.3, 7.3 Hz, 4H), 1.30 (d, *J* = 6.2 Hz, 6H), 0.90 (t, *J* = 7.3 Hz, 6H); <sup>13</sup>C NMR (126 MHz, CDCl<sub>3</sub>) δ 202.8, 154.5, 106.2, 87.1, 71.7, 66.5, 34.3, 21.7, 20.6, 13.7; HRMS (ESI): *m/z* calcd. for [C<sub>14</sub>H<sub>24</sub>O<sub>3</sub>Na]<sup>+</sup> 263.16177, found 263.16092.

### 4-Butylocta-2,3-dien-1-yl isopropyl carbonate (1c)

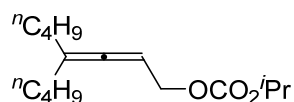

1c

Yield, 84%. Colorless oil. NMR data:  $^1\text{H}$  NMR (500 MHz,  $\text{CDCl}_3$ )  $\delta$  5.30-5.22 (m, 1H), 4.87 (septet,  $J = 6.3$  Hz, 1H), 4.56 (d,  $J = 6.8$  Hz, 2H), 1.98-1.90 (m, 4H), 1.43-1.34 (m, 4H), 1.34-1.26 (m, 4H), 1.30 (d,  $J = 6.4$  Hz, 6H), 0.89 (t,  $J = 7.2$  Hz, 6H);  $^{13}\text{C}$  NMR (126 MHz,  $\text{CDCl}_3$ ):  $\delta$  202.7, 154.5, 106.6, 87.1, 71.7, 66.5, 31.9, 29.6, 22.3, 21.7, 13.8; HRMS (ESI):  $m/z$  calcd. for  $[\text{C}_{16}\text{H}_{28}\text{O}_3\text{Na}]^+$  291.19307, found 291.19223.

### Isopropyl (4-pentylnona-2,3-dien-1-yl) carbonate (1d)

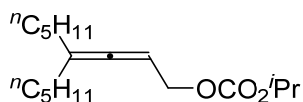

1d

Yield, 89%. Colorless oil. NMR data:  $^1\text{H}$  NMR (500 MHz,  $\text{CDCl}_3$ )  $\delta$  5.29-5.22 (m, 1H), 4.87 (septet,  $J = 6.3$  Hz, 1H), 4.56 (d,  $J = 6.9$  Hz, 2H), 1.96-1.90 (m, 4H), 1.45-1.35 (m, 4H), 1.33-1.23 (m, 8H), 1.30 (d,  $J = 6.2$  Hz, 6H), 0.88 (t,  $J = 6.8$  Hz, 6H);  $^{13}\text{C}$  NMR (126 MHz,  $\text{CDCl}_3$ )  $\delta$  202.8, 154.5, 106.6, 87.1, 71.7, 66.6, 32.1, 31.4, 27.1, 22.4, 21.7, 14.0; HRMS (ESI):  $m/z$  calcd. for  $[\text{C}_{18}\text{H}_{32}\text{O}_3\text{Na}]^+$  319.22437, found 319.22348.

### 3-Cyclohexylideneallyl isopropyl carbonate (1e)

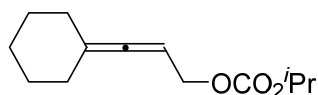

1e

Yield, 79%. Colorless oil. NMR data:  $^1\text{H}$  NMR (500 MHz,  $\text{CDCl}_3$ )  $\delta$  5.18-5.11 (m, 1H), 4.87 (septet,  $J = 6.3$  Hz, 1H), 4.55 (d,  $J = 6.9$  Hz, 2H), 2.15-2.08 (m, 4H), 1.62-1.54 (m, 4H), 1.54-1.47 (m, 2H), 1.30 (d,  $J = 6.3$  Hz, 6H);  $^{13}\text{C}$  NMR (126 MHz,  $\text{CDCl}_3$ )  $\delta$  200.3, 154.4, 104.4, 84.2, 71.7, 66.6, 32.4, 31.0, 27.1, 25.9, 21.7; HRMS (ESI):  $m/z$  calcd. for  $[\text{C}_{13}\text{H}_{20}\text{O}_3\text{Na}]^+$  247.13047, found 247.12973.

### 3-(4,4-Dimethylcyclohexylidene)allyl isopropyl carbonate (1f)

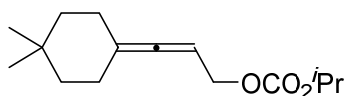

1f

Yield, 87%. Colorless oil. NMR data:  $^1\text{H}$  NMR (500 MHz,  $\text{CDCl}_3$ )  $\delta$  5.18-5.09 (m, 1H), 4.86 (septet,  $J = 6.3$  Hz, 1H), 4.54 (d,  $J = 6.9$  Hz, 2H), 2.20-2.07 (m, 4H), 1.37 (t,  $J = 6.3$  Hz, 4H), 1.29 (d,  $J = 6.3$  Hz, 6H), 0.92 (s, 3H), 0.91 (s, 3H);  $^{13}\text{C}$  NMR (126 MHz,  $\text{CDCl}_3$ )  $\delta$  200.2, 154.4, 103.9, 84.2, 71.7, 66.6, 39.5, 29.9, 28.0(6), 28.0(4), 26.8, 21.7; HRMS (ESI):  $m/z$  calcd. for  $[\text{C}_{15}\text{H}_{24}\text{O}_3\text{Na}]^+$  275.16177, found 275.16086.

### Isopropyl (3-(tetrahydro-4H-pyran-4-ylidene)allyl) carbonate (1g)

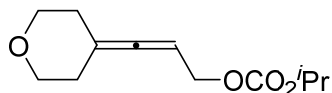

**1g**

Yield, 82%. Colorless oil. NMR data:  $^1\text{H}$  NMR (500 MHz,  $\text{CDCl}_3$ )  $\delta$  5.30-5.20 (m, 1H), 4.87 (septet,  $J = 6.3$  Hz, 1H), 4.57 (d,  $J = 6.7$  Hz, 2H), 3.78-3.69 (m, 4H), 2.30-2.20 (m, 4H), 1.30 (dd,  $J = 6.3$  Hz, 6H);  $^{13}\text{C}$  NMR (126 MHz,  $\text{CDCl}_3$ )  $\delta$  200.3, 154.4, 100.0, 85.8, 71.8, 68.3, 65.9, 31.0, 21.7; HRMS (ESI):  $m/z$  calcd. for  $[\text{C}_{12}\text{H}_{18}\text{O}_4\text{Na}]^+$  249.10973, found 249.10918.

### 3-Cycloheptylideneallyl isopropyl carbonate (1h)

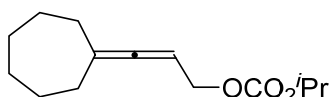

**1h**

Yield, 92%. Colorless oil. NMR data:  $^1\text{H}$  NMR (500 MHz,  $\text{CDCl}_3$ )  $\delta$  5.15-5.09 (m, 1H), 4.87 (septet,  $J = 6.2$  Hz, 1H), 4.55 (d,  $J = 6.8$  Hz, 2H), 2.32-2.16 (m, 4H), 1.65-1.58 (m, 4H), 1.57-1.50 (m, 4H), 1.30 (d,  $J = 6.2$  Hz, 6H);  $^{13}\text{C}$  NMR (126 MHz,  $\text{CDCl}_3$ )  $\delta$  203.5, 154.4, 106.5, 84.0, 71.7, 66.5, 32.0, 29.2, 28.2, 21.7; HRMS (ESI):  $m/z$  calcd. for  $[\text{C}_{14}\text{H}_{22}\text{O}_3\text{Na}]^+$  261.14612, found 261.14536.

### 3-Cyclooctylideneallyl isopropyl carbonate (1i)

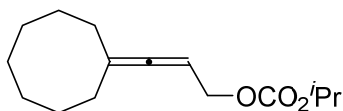

**1i**

Yield, 93%. Colorless oil. NMR data:  $^1\text{H}$  NMR (500 MHz,  $\text{CDCl}_3$ )  $\delta$  5.19-5.11 (m, 1H), 4.87 (septet,  $J = 6.2$  Hz, 1H), 4.56 (d,  $J = 6.9$  Hz, 2H), 2.22-2.11 (m, 4H), 1.68-1.48 (m, 10H), 1.30 (d,  $J = 6.3$  Hz, 6H);  $^{13}\text{C}$  NMR (126 MHz,  $\text{CDCl}_3$ )  $\delta$  203.7, 154.5, 106.5, 84.7, 71.7, 66.1, 31.2, 26.7, 26.6, 26.0, 21.7; HRMS (ESI):  $m/z$  calcd. for  $[\text{C}_{15}\text{H}_{24}\text{O}_3\text{Na}]^+$  275.16177, found 275.16119.

### 3-Cyclododecylideneallyl isopropyl carbonate (1j)

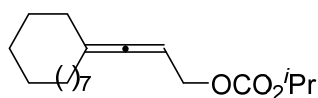

**1j**

Yield, 89%. Colorless oil. NMR data:  $^1\text{H}$  NMR (500 MHz,  $\text{CDCl}_3$ )  $\delta$  5.28-5.21 (m, 1H), 4.88 (septet,  $J = 6.3$  Hz, 1H), 4.58 (d,  $J = 6.9$  Hz, 2H), 2.08-1.97 (m, 4H), 1.51-1.43 (m, 4H), 1.37-1.24 (m, 14H), 1.30 (d,  $J = 6.3$  Hz, 6H);  $^{13}\text{C}$  NMR (126 MHz,  $\text{CDCl}_3$ )  $\delta$  203.8, 154.5, 103.6, 86.4, 71.7, 66.3, 29.3, 24.4, 24.2, 23.8, 22.9, 22.2, 21.7; HRMS (ESI):  $m/z$  calcd. for  $[\text{C}_{19}\text{H}_{32}\text{O}_3\text{Na}]^+$  331.22437, found 331.22342.

**5-Ethylnona-2,3-dien-1-yl isopropyl carbonate (1k)**

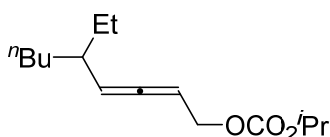

**1k**

Yield, 91%. Colorless oil. NMR data:  $^1\text{H}$  NMR (500 MHz,  $\text{CDCl}_3$ )  $\delta$  5.30-5.25 (m, 1H), 5.13-5.04 (m, 1H), 4.87 (septet,  $J = 6.3$  Hz, 1H), 4.58 (d,  $J = 6.5$  Hz, 2H), 2.00-1.90 (m, 1H), 1.47-1.19 (m, 14H), 0.93-0.80 (m, 6H);  $^{13}\text{C}$  NMR (126 MHz,  $\text{CDCl}_3$ )  $\delta$  205.3(8), 205.3(6), 154.4, 96.9(6), 96.9(4), 86.4(5), 86.4(1), 71.8, 66.1, 40.8, 40.7, 34.4, 34.2, 29.3, 29.2, 27.9, 27.8, 22.7, 22.6, 21.7, 14.0, 11.5, 11.4; HRMS (ESI):  $m/z$  calcd. for  $[\text{C}_{15}\text{H}_{26}\text{O}_3\text{Na}]^+$  277.17742, found 277.17648.

**4-Cyclohexylbuta-2,3-dien-1-yl isopropyl carbonate (1l)**

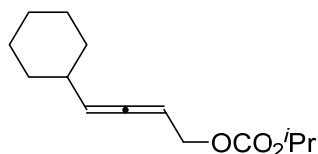

**1l**

Yield, 87%. Colorless oil. NMR data:  $^1\text{H}$  NMR (500 MHz,  $\text{CDCl}_3$ )  $\delta$  5.35-5.23 (m, 2H), 4.87 (septet,  $J = 6.3$  Hz, 1H), 4.58 (dd,  $J = 6.7, 1.6$  Hz, 2H), 2.06-1.93 (m, 1H), 1.74 (appt,  $J = 14.5$  Hz, 4H), 1.66-1.59 (m, 1H), 1.30 (d,  $J = 6.3$  Hz, 6H), 1.27-1.02 (m, 5H);  $^{13}\text{C}$  NMR (126 MHz,  $\text{CDCl}_3$ )  $\delta$  204.5, 154.4, 99.0, 87.4, 71.8, 66.0, 36.7, 32.8(5), 32.8(2), 26.0, 25.9, 21.7; HRMS (ESI):  $m/z$  calcd. for  $[\text{C}_{14}\text{H}_{22}\text{O}_3\text{Na}]^+$  261.14612, found 261.14548.

**Isopropyl (6-methylhepta-2,3-dien-1-yl) carbonate (1m)**



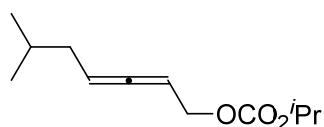

**1m**

Yield, 85%. Colorless oil. NMR data:  $^1\text{H}$  NMR (500 MHz,  $\text{CDCl}_3$ )  $\delta$  5.30-5.19 (m, 2H), 4.87 (septet,  $J = 6.3$  Hz, 1H), 4.62-4.54 (m, 2H), 1.96-1.85 (m, 2H), 1.66 (septet,  $J = 6.6$  Hz, 1H), 1.30 (d,  $J = 6.3$  Hz, 6H), 0.91 (d,  $J = 6.5$  Hz, 6H);  $^{13}\text{C}$  NMR (126 MHz,  $\text{CDCl}_3$ )  $\delta$  206.1, 154.4, 91.4, 85.8, 71.8, 65.9, 37.6, 28.2, 22.1, 22.0, 21.7; HRMS (ESI):  $m/z$  calcd. for  $[\text{C}_{12}\text{H}_{20}\text{O}_3\text{Na}]^+$  235.13047, found 235.13020.

**Isopropyl (6-phenylhexa-2,3-dien-1-yl) carbonate (1n)**

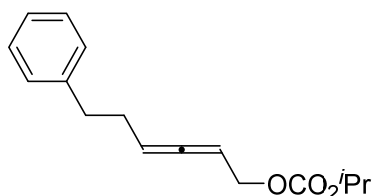

**1n**

Yield, 88%. Colorless oil. NMR data:  $^1\text{H}$  NMR (500 MHz,  $\text{CDCl}_3$ )  $\delta$  7.30-7.26 (m, 2H), 7.21-7.15 (m, 3H), 5.36-5.25 (m, 2H), 4.87 (septet,  $J = 6.4$  Hz, 1H), 4.52 (dd,  $J = 6.8, 2.4$  Hz, 2H), 2.80-2.64 (m, 2H), 2.38-2.27 (m, 2H), 1.29 (d,  $J = 6.3$  Hz, 6H);  $^{13}\text{C}$  NMR (126 MHz,  $\text{CDCl}_3$ )  $\delta$  205.7, 154.4, 141.3, 128.4, 128.2, 125.9, 92.2, 87.0, 71.9, 65.7, 35.1, 29.8, 21.7; HRMS (ESI):  $m/z$  calcd. for  $[\text{C}_{16}\text{H}_{20}\text{O}_3\text{Na}]^+$  283.13047, found 283.12955.

**Dodeca-2,3-dien-1-yl isopropyl carbonate (1o)**

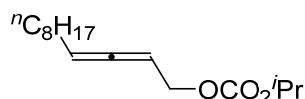

**1o**

Yield, 84%. Colorless oil. NMR data:  $^1\text{H}$  NMR (500 MHz,  $\text{CDCl}_3$ ):  $\delta$  5.30-5.23 (m, 2H), 4.87 (septet,  $J = 6.5$  Hz, 1H), 4.58 (dd,  $J = 4.5, 4.5$  Hz, 2H), 2.05-1.96 (m, 2H), 1.42-1.34 (m, 2H), 1.34-1.20 (m, 16H), 0.88 (t,  $J = 6.9$  Hz, 3H);  $^{13}\text{C}$  NMR (126 MHz,  $\text{CDCl}_3$ )  $\delta$  205.6, 154.4, 93.0, 86.4, 71.8, 65.9, 31.8, 29.3, 29.2, 29.0, 28.9, 28.2, 22.6, 21.7, 14.0; HRMS (ESI):  $m/z$  calcd. for  $[\text{C}_{16}\text{H}_{28}\text{O}_3\text{Na}]^+$  291.19307, found 291.19205.

**Isopropyl trideca-2,3-dien-1-yl carbonate (1p)**

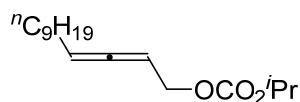

**1p**

Yield, 87%. Colorless oil. NMR data:  $^1\text{H}$  NMR (500 MHz,  $\text{CDCl}_3$ ):  $\delta$  5.34-5.21 (m, 2H), 4.87 (septet,  $J = 6.2$  Hz, 1H), 4.58 (dd,  $J = 4.5, 4.5$  Hz, 2H), 2.06-1.96 (m, 2H), 1.44-1.35 (m, 2H), 1.35-1.20 (m, 18H), 0.88 (t,  $J = 6.8$  Hz, 3H);  $^{13}\text{C}$  NMR (126 MHz,  $\text{CDCl}_3$ )  $\delta$  205.6, 154.4, 93.0, 86.5, 71.9, 66.0, 31.8, 29.5, 29.4, 29.3, 29.0, 28.9, 28.2, 22.6, 21.7, 14.0; HRMS (ESI):  $m/z$  calcd. for  $[\text{C}_{17}\text{H}_{30}\text{O}_3\text{Na}]^+$  305.20872, found 305.20795.

## 2. Synthesis of 2-Boryl 1,3-Butadienes 3

An oven-dried Schlenk flask was equipped with a Teflon coated stirrer bar and charged with activated 3Å molecular sieves (3-4 pellets),  $\text{Pd}_2\text{dba}_3$  (0.005 mmol),  $\text{CuI}$  (0.01 mol),  $\text{P}(\text{OEt})_3$  (0.03 mmol),  $\text{B}_2\text{pin}_2$  **2a** (0.30 mmol), and THF (1 mL) under Ar atmosphere. The resulted solution was stirred for 10 min, then a THF solution (1 mL) of **1** (0.2 mmol) was added to the reaction mixture via syringe. The final reaction mixture was stirred at room temperature for 24 hours. Completion of the reaction was checked by TLC and/or crude  $^1\text{H}$  NMR spectrum. After a complete conversion of **1**, the reaction mixture was diluted by petroleum ether (about 5 mL). The precipitate was filtered off by a short silica pad (Qingdao Haiyang Chem, neutral, 300-400 Mesh, about 2-3 cm in pipette) using EtOAc/petroleum ether (1:10 v/v) as an eluent. The solvent was removed and the residue was purified by a rapid silica gel chromatography (within 10 min) using a mixture of petroleum ether/EtOAc as eluent affording pure product **3**.

### 2-(4-Hexyldeca-1,3-dien-3-yl)-4,4,5,5-tetramethyl-1,3,2-dioxaborolane (**3a**)

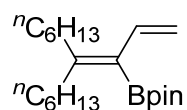

**3a**

Yield, 71%. Colorless oil. NMR data:  $^1\text{H}$  NMR (500 MHz,  $\text{CDCl}_3$ )  $\delta$  6.69 (dd,  $J = 17.6, 10.8$  Hz, 1H), 5.16 (dd,  $J = 17.6, 1.8$  Hz, 1H), 5.01 (dd,  $J = 10.7, 1.8$  Hz, 1H), 2.20-2.12 (m, 4H), 1.43-1.26 (m, 16H), 1.32 (s, 12H), 0.88 (t,  $J = 6.6$  Hz, 6H);  $^{13}\text{C}$  NMR (126 MHz,  $\text{CDCl}_3$ )  $\delta$  154.7, 136.2, 114.3, 83.2, 37.7, 32.0, 31.7(9), 31.7(0), 29.7, 29.6, 29.5, 29.0, 24.9, 22.6, 22.5, 14.0(7), 14.0(5); Carbons with directly attached boron atoms were not observed, most likely due to quadrupolar relaxation.  $^{11}\text{B}$  NMR (128 MHz,  $\text{CDCl}_3$ )  $\delta$  31. HRMS (ESI):  $m/z$  calcd. for  $[\text{C}_{22}\text{H}_{42}\text{BO}_2]^+$  349.32724, found 349.32672.

### 4,4,5,5-Tetramethyl-2-(4-propylhepta-1,3-dien-3-yl)-1,3,2-dioxaborolane (**3b**)

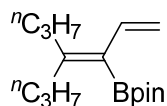

**3b**

Yield, 84%. Colorless oil. NMR data:  $^1\text{H}$  NMR (500 MHz,  $\text{CDCl}_3$ )  $\delta$  6.70 (dd,  $J = 17.6, 10.8$  Hz, 1H), 5.17 (dd,  $J = 17.5, 1.8$  Hz, 1H), 5.01 (dd,  $J = 10.9, 1.8$  Hz, 1H), 2.19-2.11 (m, 4H), 1.51-1.38 (m, 4H), 1.33 (s, 12H), 0.91 (t,  $J = 7.3$  Hz, 3H), 0.89 (t,  $J = 7.3$  Hz, 3H);  $^{13}\text{C}$  NMR (126 MHz,  $\text{CDCl}_3$ )  $\delta$  154.1, 136.3, 114.3, 83.2, 39.6, 34.1, 24.9, 22.7, 22.2, 14.4, 14.2; Carbons with directly attached boron atoms were not observed, most likely due to quadrupolar relaxation.  $^{11}\text{B}$  NMR (128 MHz,  $\text{CDCl}_3$ )  $\delta$  31. HRMS (ESI):  $m/z$  calcd. for  $[\text{C}_{16}\text{H}_{30}\text{BO}_2]^+$  265.23334, found 265.23306.

**2-(4-Butylocta-1,3-dien-3-yl)-4,4,5,5-tetramethyl-1,3,2-dioxaborolane (3c)**

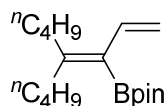

**3c**

Yield, 64%. Colorless oil. NMR data:  $^1\text{H}$  NMR (500 MHz,  $\text{CDCl}_3$ )  $\delta$  6.70 (dd,  $J = 17.4, 10.9$  Hz, 1H), 5.16 (dd,  $J = 17.6, 1.9$  Hz, 1H), 5.01 (dd,  $J = 10.9, 1.9$  Hz, 1H), 2.22-2.13 (m, 4H), 1.48-1.20 (m, 8H), 1.32 (s, 12H), 0.92-0.86 (m, 6H);  $^{13}\text{C}$  NMR (126 MHz,  $\text{CDCl}_3$ )  $\delta$  154.6, 136.3, 114.3, 83.3, 37.4, 31.7(6), 31.7(2), 31.1, 24.9, 23.0, 14.0, 13.9; Carbons with directly attached boron atoms were not observed, most likely due to quadrupolar relaxation.  $^{11}\text{B}$  NMR (128 MHz,  $\text{CDCl}_3$ )  $\delta$  31. HRMS (ESI):  $m/z$  calcd. for  $[\text{C}_{18}\text{H}_{33}\text{BO}_2\text{Na}]^+$  315.24658, found 315.24628.

**4,4,5,5-Tetramethyl-2-(4-pentylnona-1,3-dien-3-yl)-1,3,2-dioxaborolane (3d)**

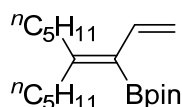

**3d**

Yield, 65%. Colorless oil. NMR data:  $^1\text{H}$  NMR (500 MHz,  $\text{CDCl}_3$ )  $\delta$  6.69 (dd,  $J = 17.5, 10.8$  Hz, 1H), 5.17 (dd,  $J = 17.5, 1.8$  Hz, 1H), 5.01 (dd,  $J = 10.8, 1.8$  Hz, 1H), 2.22-2.10 (m, 4H), 1.46-1.35 (m, 4H), 1.33 (s, 12H), 1.31-1.24 (m, 8H), 0.92-0.84 (m, 6H);  $^{13}\text{C}$  NMR (126 MHz,  $\text{CDCl}_3$ )  $\delta$  154.7, 136.2, 114.3, 83.2, 37.6, 32.1, 31.9, 29.2, 28.7, 24.9, 22.5(8), 22.5(2), 14.0, 13.9; Carbons with directly attached boron atoms were not observed, most likely due to quadrupolar relaxation.  $^{11}\text{B}$  NMR (128 MHz,  $\text{CDCl}_3$ )  $\delta$  31. HRMS (ESI):  $m/z$  calcd. for  $[\text{C}_{20}\text{H}_{38}\text{BO}_2]^+$  321.29594, found 321.29578.

**2-(1-Cyclohexylideneallyl)-4,4,5,5-tetramethyl-1,3,2-dioxaborolane (3e)**

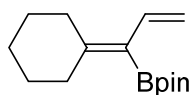

**3e**

Yield, 61%. Colorless oil. NMR data:  $^1\text{H}$  NMR (500 MHz,  $\text{CDCl}_3$ )  $\delta$  6.76 (dd,  $J = 17.5, 10.8$  Hz, 1H), 5.17 (dd,  $J = 17.5, 1.8$  Hz, 1H), 5.01 (dd,  $J = 10.8, 1.8$  Hz, 1H), 2.36-2.26 (m, 4H), 1.70-1.53 (m, 6H), 1.38 (s, 12H);  $^{13}\text{C}$  NMR (126 MHz,  $\text{CDCl}_3$ )  $\delta$  153.4, 135.5, 114.5, 83.3, 36.3, 30.3, 28.6, 27.9, 26.7, 24.9; Carbons with directly attached boron atoms were not observed, most likely due to quadrupolar relaxation.  $^{11}\text{B}$  NMR (128 MHz,  $\text{CDCl}_3$ )  $\delta$  31. HRMS (ESI):  $m/z$  calcd. for  $[\text{C}_{15}\text{H}_{25}\text{BO}_2\text{Na}]^+$  271.18398, found 271.18350.

**2-(1-(4,4-Dimethylcyclohexylidene)allyl)-4,4,5,5-tetramethyl-1,3,2-dioxaborolane (3f)**

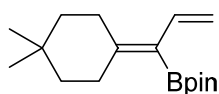

**3f**

Yield, 66%. Colorless oil. NMR data:  $^1\text{H}$  NMR (500 MHz,  $\text{CDCl}_3$ )  $\delta$  6.76 (dd,  $J = 17.6, 10.8$  Hz, 1H), 5.17 (d,  $J = 17.5$  Hz, 1H), 5.01 (d,  $J = 10.8$  Hz, 1H), 2.37-2.27 (m, 4H), 1.40 (t,  $J = 6.2$  Hz, 1H), 1.36 (t,  $J = 6.2$  Hz, 1H), 1.32 (s, 12H), 0.94 (s, 6H);  $^{13}\text{C}$  NMR (126 MHz,  $\text{CDCl}_3$ )  $\delta$  153.4, 135.5, 114.6, 83.3, 40.9, 40.2, 31.9, 30.4, 28.1, 26.1, 24.9; Carbons with directly attached boron atoms were not observed, most likely due to quadrupolar relaxation.  $^{11}\text{B}$  NMR (128 MHz,  $\text{CDCl}_3$ )  $\delta$  31. HRMS (ESI):  $m/z$  calcd. for  $[\text{C}_{17}\text{H}_{29}\text{BO}_2\text{Na}]^+$  299.21528, found 299.21512.

**4,4,5,5-Tetramethyl-2-(1-(tetrahydro-4H-pyran-4-ylidene)allyl)-1,3,2-dioxaborolane (3g)**

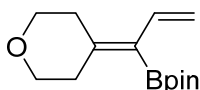

**3g**

Yield, 72%. Colorless oil. NMR data:  $^1\text{H}$  NMR (500 MHz,  $\text{CDCl}_3$ )  $\delta$  6.71 (dd,  $J = 17.5, 10.8$  Hz, 1H), 5.27 (d,  $J = 17.6$  Hz, 1H), 5.09 (d,  $J = 10.8$  Hz, 1H), 3.73 (t,  $J = 5.4$  Hz, 2H), 3.69 (t,  $J = 5.4$  Hz, 2H), 2.48 (t,  $J = 5.4$  Hz, 2H), 2.47 (t,  $J = 5.4$  Hz, 2H), 1.32 (s, 12H);  $^{13}\text{C}$  NMR (126 MHz,  $\text{CDCl}_3$ )  $\delta$  147.9, 134.7, 116.0, 83.5, 69.1, 68.5, 36.0, 31.2, 24.8; Carbons with directly attached boron atoms were not observed, most likely due to quadrupolar relaxation.  $^{11}\text{B}$  NMR (128 MHz,  $\text{CDCl}_3$ )  $\delta$  31. HRMS (ESI):  $m/z$  calcd. for  $[\text{C}_{14}\text{H}_{23}\text{BO}_3\text{Na}]^+$  273.16325, found 273.16299.

**2-(1-Cycloheptylideneallyl)-4,4,5,5-tetramethyl-1,3,2-dioxaborolane (3h)**

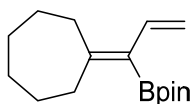

**3h**

Yield, 76%. Colorless oil. NMR data:  $^1\text{H}$  NMR (500 MHz,  $\text{CDCl}_3$ )  $\delta$  6.72 (dd,  $J = 17.6, 10.8$  Hz, 1H), 5.15 (dd,  $J = 17.6, 1.9$  Hz, 1H), 5.01 (dd,  $J = 10.8, 1.8$  Hz, 1H), 2.49-2.33 (m, 4H), 1.66-1.55 (m, 4H), 1.53-1.44 (m, 4H), 1.32 (s, 12H);  $^{13}\text{C}$  NMR (126 MHz,  $\text{CDCl}_3$ )  $\delta$  154.6, 136.0, 114.3, 83.2, 36.6, 31.9, 29.0, 28.6, 26.5, 24.8; Carbons with directly attached boron atoms were not observed, most likely due to quadrupolar relaxation.  $^{11}\text{B}$  NMR (128 MHz,  $\text{CDCl}_3$ )  $\delta$  31. HRMS (ESI):  $m/z$  calcd. for  $[\text{C}_{16}\text{H}_{28}\text{BO}_2]^+$  263.21769, found 263.21713.

**2-(1-Cyclooctylideneallyl)-4,4,5,5-tetramethyl-1,3,2-dioxaborolane (3i)**

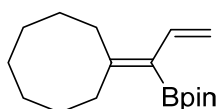

**3i**

Yield, 67%. Colorless oil. NMR data:  $^1\text{H}$  NMR (500 MHz,  $\text{CDCl}_3$ )  $\delta$  6.75 (dd,  $J = 17.5, 10.8$  Hz, 1H), 5.14 (dd,  $J = 17.6, 1.8$  Hz, 1H), 5.01 (dd,  $J = 10.7, 1.8$  Hz, 1H), 2.40-2.32 (m, 4H), 1.73-1.63 (m, 4H), 1.54-1.42 (m, 6H), 1.33 (s, 12H);  $^{13}\text{C}$  NMR (126 MHz,  $\text{CDCl}_3$ )  $\delta$  155.5, 136.3, 113.8, 83.2, 36.8, 31.0, 27.4, 27.3, 26.5, 26.4, 25.8, 24.9; Carbons with directly attached boron atoms were not observed, most likely due to quadrupolar relaxation.  $^{11}\text{B}$  NMR (128 MHz,  $\text{CDCl}_3$ )  $\delta$  31. HRMS (ESI):  $m/z$  calcd. for  $[\text{C}_{17}\text{H}_{30}\text{BO}_2]^+$  277.23334, found 277.23300.

**2-(1-Cyclododecylideneallyl)-4,4,5,5-tetramethyl-1,3,2-dioxaborolane (3j)**

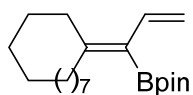

**3j**

Yield, 74%. Colorless oil. NMR data:  $^1\text{H}$  NMR (500 MHz,  $\text{CDCl}_3$ )  $\delta$  6.74 (dd,  $J = 17.6, 10.8$  Hz, 1H), 5.16 (dd,  $J = 17.6, 1.9$  Hz, 1H), 5.01 (dd,  $J = 10.8, 1.9$  Hz, 1H), 2.24-2.14 (m, 4H), 1.56-1.36 (m, 18H), 1.33 (s, 12H);  $^{13}\text{C}$  NMR (126 MHz,  $\text{CDCl}_3$ )  $\delta$  154.2, 136.3, 114.4, 83.3, 33.1, 27.1, 26.0(8), 26.0(0), 25.9, 24.8, 24.5, 24.0, 22.9, 22.8, 22.0(9), 22.0(0); Carbons with directly attached boron atoms were not observed, most likely due to quadrupolar relaxation.  $^{11}\text{B}$  NMR (128 MHz,  $\text{CDCl}_3$ )  $\delta$  31. HRMS (ESI):  $m/z$  calcd. for  $[\text{C}_{21}\text{H}_{38}\text{BO}_2]^+$  333.29594, found 333.29565.

**(Z)-2-(5-ethylnona-1,3-dien-3-yl)-4,4,5,5-tetramethyl-1,3,2-dioxaborolane (3k)**

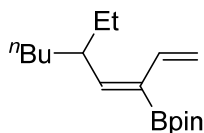

**3k**

Yield, 84%. Colorless oil. NMR data:  $^1\text{H}$  NMR (500 MHz,  $\text{CDCl}_3$ )  $\delta$  6.68 (dd,  $J = 17.5, 11.0$  Hz, 1H), 6.02 (d,  $J = 10.1$  Hz, 1H), 5.66 (dd,  $J = 17.6, 2.5$  Hz, 1H), 5.13 (d,  $J = 11.1$ , 1H), 2.58-2.45 (m, 1H), 1.49-1.37 (m, 2H), 1.29 (s, 12H), 1.27-1.14 (m, 6H), 0.85 (t,  $J = 6.5$  Hz, 3H), 0.82 (t,  $J = 7.2$  Hz, 3H);  $^{13}\text{C}$  NMR (126 MHz,  $\text{CDCl}_3$ )  $\delta$  153.1, 134.4, 117.2, 83.0, 39.8, 34.7, 29.6, 28.1, 24.7, 22.8, 14.0, 11.9; Carbons with directly attached boron atoms were not observed, most likely due to quadrupolar relaxation.  $^{11}\text{B}$  NMR (128 MHz,  $\text{CDCl}_3$ )  $\delta$  30. HRMS (ESI):  $m/z$  calcd. for  $[\text{C}_{17}\text{H}_{31}\text{BO}_2\text{Na}]^+$  310.23093, found 310.23077.

**(Z)-2-(1-Cyclohexylbuta-1,3-dien-2-yl)-4,4,5,5-tetramethyl-1,3,2-dioxaborolane (3l)**

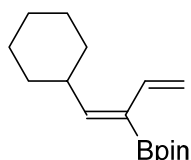

**3l**

Yield, 80%. Colorless oil. NMR data:  $^1\text{H}$  NMR (500 MHz,  $\text{CDCl}_3$ )  $\delta$  6.69 (dd,  $J = 17.5, 11.0$  Hz, 1H), 6.13 (d,  $J = 8.8$  Hz, 1H), 5.66 (d,  $J = 17.4$  Hz, 1H), 5.14 (d,  $J = 10.8$  Hz, 1H), 2.60-2.45 (m, 1H), 1.78-1.50 (m, 6H), 1.28 (s, 12H), 1.21-1.04 (m, 4H);  $^{13}\text{C}$  NMR (126 MHz,  $\text{CDCl}_3$ )  $\delta$  153.2, 133.9, 117.3, 83.0, 37.4, 32.4, 25.9, 25.8, 24.7; Carbons with directly attached boron atoms were not observed, most likely due to quadrupolar relaxation.  $^{11}\text{B}$  NMR (128 MHz,  $\text{CDCl}_3$ )  $\delta$  30. HRMS (ESI):  $m/z$  calcd. for  $[\text{C}_{16}\text{H}_{27}\text{BO}_2\text{Na}]^+$  285.19963, found 285.19922.

**(Z)-4,4,5,5-Tetramethyl-2-(6-methylhepta-1,3-dien-3-yl)-1,3,2-dioxaborolane (3m)**

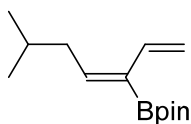

**3m**

Yield, 85%. Colorless oil. NMR data:  $^1\text{H}$  NMR (500 MHz,  $\text{CDCl}_3$ )  $\delta$  6.69 (dd,  $J = 17.5, 11.0$  Hz, 1H), 6.34 (t,  $J = 7.5$  Hz, 1H), 5.67 (dd,  $J = 17.5, 2.4$  Hz, 1H), 5.16 (d,  $J = 11.0$  Hz, 1H), 2.15 (t,  $J = 7.2$  Hz, 2H), 1.72 (septet,  $J = 6.7$  Hz, 1H), 1.29 (s, 12H), 0.91 (d,  $J = 6.6$  Hz, 6H);  $^{13}\text{C}$  NMR (126 MHz,  $\text{CDCl}_3$ )  $\delta$  147.0, 133.9, 117.4, 83.0, 37.7, 28.4, 24.7, 22.5. Carbons with directly attached boron atoms were not observed, most likely due to quadrupolar relaxation.  $^{11}\text{B}$  NMR (128 MHz,  $\text{CDCl}_3$ )  $\delta$  30. HRMS (ESI):  $m/z$  calcd. for  $[\text{C}_{14}\text{H}_{26}\text{BO}_2]^+$  237.20204, found 237.20161.

**(Z)-4,4,5,5-Tetramethyl-2-(6-phenylhexa-1,3-dien-3-yl)-1,3,2-dioxaborolane (3n)**

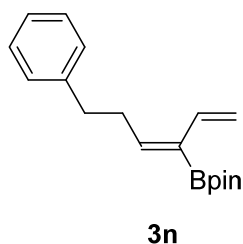

Yield, 66%. Colorless oil. NMR data:  $^1\text{H}$  NMR (500 MHz,  $\text{CDCl}_3$ )  $\delta$  7.31-7.260 (m, 2H), 7.23-7.14 (m, 3H), 6.67 (dd,  $J = 17.5, 11.0$  Hz, 1H), 6.39 (t,  $J = 7.1$  Hz, 1H), 5.67 (dd,  $J = 17.6, 1.0$  Hz, 1H), 5.17 (d,  $J = 11.0$  Hz, 1H), 2.77-2.67 (m, 2H), 2.60-2.50 (m, 2H), 1.29 (s, 12H);  $^{13}\text{C}$  NMR (126 MHz,  $\text{CDCl}_3$ )  $\delta$  146.5, 141.8, 133.5, 128.3, 128.2, 125.8, 117.9, 83.2, 35.3, 30.7, 24.7. Carbons with directly attached boron atoms were not observed, most likely due to quadrupolar relaxation.  $^{11}\text{B}$  NMR (128 MHz,  $\text{CDCl}_3$ )  $\delta$  30. HRMS (ESI):  $m/z$  calcd. for  $[\text{C}_{18}\text{H}_{26}\text{BO}_2]^+$  280.20204, found 280.20154.

**(Z)-2-(dodeca-1,3-dien-3-yl)-4,4,5,5-tetramethyl-1,3,2-dioxaborolane (3o)**

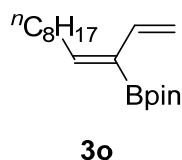

Yield, 72%. Colorless oil. NMR data:  $^1\text{H}$  NMR (500 MHz,  $\text{CDCl}_3$ )  $\delta$  6.69 (dd,  $J = 17.5, 11.0$  Hz, 1H), 6.33 (t,  $J = 7.3$  Hz, 1H), 5.66 (d,  $J = 17.6$  Hz, 1H), 5.16 (d,  $J = 11.0$  Hz, 1H), 2.25 (dt,  $J = 7.3, 7.3$  Hz, 1H), 1.46-1.35 (m, 2H), 1.29 (s, 12H), 1.27-1.15 (m, 10H), 0.88 (t,  $J = 6.8$  Hz, 3H);  $^{13}\text{C}$  NMR (126 MHz,  $\text{CDCl}_3$ )  $\delta$  148.2, 133.8, 117.4, 83.1, 31.8, 29.4, 29.4, 29.2, 29.0, 28.7, 24.7, 22.6, 14.0; Carbons with directly attached boron atoms were not observed, most likely due to quadrupolar relaxation.  $^{11}\text{B}$  NMR (128 MHz,  $\text{CDCl}_3$ )  $\delta$  30. HRMS (ESI):  $m/z$  calcd. for  $[\text{C}_{18}\text{H}_{34}\text{BO}_2]^+$  293.26464, found 293.26422.

**(Z)-4,4,5,5-tetramethyl-2-(trideca-1,3-dien-3-yl)-1,3,2-dioxaborolane (3p)**

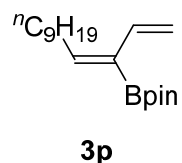

Yield, 69%. Colorless oil. NMR data:  $^1\text{H}$  NMR (500 MHz,  $\text{CDCl}_3$ )  $\delta$  6.69 (dd,  $J = 17.5, 11.0$  Hz, 1H), 6.33 (t,  $J = 7.1$  Hz, 1H), 5.66 (d,  $J = 17.5$  Hz, 1H), 5.16 (d,  $J = 11.0$  Hz, 1H), 2.25 (dt,  $J = 7.3, 7.3$  Hz, 2H), 1.46-1.35 (m, 2H), 1.28 (s, 12H), 1.27-1.15 (m, 12H), 0.88 (t,  $J = 6.8$  Hz, 3H);  $^{13}\text{C}$  NMR (126 MHz,  $\text{CDCl}_3$ )  $\delta$  148.2, 133.8, 117.3, 83.1, 31.8, 29.5, 29.4, 29.3, 29.0, 28.7, 24.7, 22.6, 14.0; Carbons with directly attached boron atoms were not observed, most likely due to quadrupolar relaxation.  $^{11}\text{B}$  NMR (128 MHz,  $\text{CDCl}_3$ )  $\delta$  30. HRMS (ESI):  $m/z$  calcd. for  $[\text{C}_{19}\text{H}_{36}\text{BO}_2]^+$  307.28029, found 307.27975.

**(3aR,4R,6R,7aS)-2-(4-Hexyldeca-1,3-dien-3-yl)-3a,5,5-trimethylhexahydro-4,6-methanobenzo[d][1,3,2]dioxaborole (3ab)**

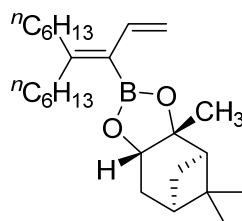

**3ab**

Yield, 83%. Colorless oil. NMR data:  $^1\text{H}$  NMR (500 MHz,  $\text{CDCl}_3$ )  $\delta$  6.71 (dd,  $J = 17.5, 10.8$  Hz, 1H), 5.21 (dd,  $J = 17.6, 1.8$  Hz, 1H), 5.03 (dd,  $J = 10.8, 1.8$  Hz, 1H), 4.38 (dd,  $J = 8.9, 2.1$  Hz, 1H), 2.41-2.36 (m, 1H), 2.28-2.14 (m, 5H), 2.11 (dd,  $J = 5.2, 5.2$  Hz, 1H), 2.00-1.85 (m, 2H), 1.44 (s, 3H), 1.42-1.36 (m, 4H), 1.35-1.20 (m, 16H), 0.95-0.80 (m, 9H);  $^{13}\text{C}$  NMR (126 MHz,  $\text{CDCl}_3$ )  $\delta$  155.2, 136.4, 114.5, 85.6, 77.6, 51.2, 39.5, 38.1, 37.8, 35.6, 32.1, 31.7(8), 31.7(0), 29.7, 29.6, 29.5, 28.9, 28.8, 27.0, 26.7, 24.0, 22.6, 22.5, 14.0; Carbons with directly attached boron atoms were not observed, most likely due to quadrupolar relaxation.  $^{11}\text{B}$  NMR (128 MHz,  $\text{CDCl}_3$ )  $\delta$  30. HRMS (ESI):  $m/z$  calcd. for  $[\text{C}_{26}\text{H}_{46}\text{BO}_2]^+$  401.35854, found 401.35751.

**(3aS,4S,6S,7aR)-2-(4-Hexyldeca-1,3-dien-3-yl)-3a,5,5-trimethylhexahydro-4,6-methanobenzo[d][1,3,2]dioxaborole (3ac)**

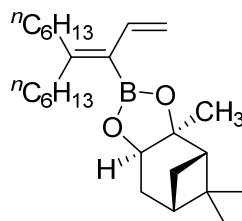

**3ac**

Yield, 85%. Colorless oil. NMR data:  $^1\text{H}$  NMR (500 MHz,  $\text{CDCl}_3$ )  $\delta$  6.71 (dd,  $J = 17.5, 10.8$  Hz, 1H), 5.21 (d,  $J = 17.6$  Hz, 1H), 5.03 (d,  $J = 10.9$  Hz, 1H), 4.38 (dd,  $J = 8.5, 2.0$  Hz, 1H), 2.44-2.34 (m, 1H), 2.28-2.13 (m, 5H), 2.11 (dd,  $J = 5.3, 5.3$  Hz, 1H), 1.98-1.85 (m, 2H), 1.44 (s, 3H), 1.43-1.34 (m, 4H), 1.33-1.16 (m, 16H), 0.96-0.76 (m, 9H);  $^{13}\text{C}$  NMR (126 MHz,  $\text{CDCl}_3$ )  $\delta$  155.2, 136.4, 114.5, 85.6, 77.6, 51.2, 39.5, 38.2, 37.8, 35.6, 32.1, 31.7(8), 31.7(0), 29.7, 29.6, 29.5, 29.0, 28.8, 27.0, 26.7, 24.0, 22.6, 22.5, 14.0; Carbons with directly attached boron atoms were not observed, most likely due to quadrupolar relaxation.  $^{11}\text{B}$  NMR (128 MHz,  $\text{CDCl}_3$ )  $\delta$  30. HRMS (ESI):  $m/z$  calcd. for  $[\text{C}_{26}\text{H}_{46}\text{BO}_2]^+$  401.35854, found 401.35742.

**2-(4-Hexyldeca-1,3-dien-3-yl)-4,4,6,6-tetramethyl-1,3,2-dioxaborinane (3ad)**



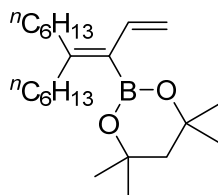

**3ad**

Yield, 61%. Colorless oil. NMR data:  $^1\text{H}$  NMR (500 MHz,  $\text{CDCl}_3$ )  $\delta$  6.72 (dd,  $J = 17.5, 10.6$  Hz, 1H), 5.06 (d,  $J = 17.5$  Hz, 1H), 4.97 (d,  $J = 10.6$  Hz, 1H), 2.13 (t,  $J = 7.7$  Hz, 2H), 2.08 (t,  $J = 7.7$  Hz, 2H), 1.89 (s, 2H), 1.40 (s, 12H), 1.47-1.20 (m, 16H), 0.88 (t,  $J = 6.8$  Hz, 6H);  $^{13}\text{C}$  NMR (126 MHz,  $\text{CDCl}_3$ )  $\delta$  150.1, 136.5, 113.6, 71.0, 49.1, 38.1, 31.9, 31.8, 31.7(6), 31.7(3), 29.9, 29.3, 29.1, 22.6, 14.0; Carbons with directly attached boron atoms were not observed, most likely due to quadrupolar relaxation.  $^{11}\text{B}$  NMR (128 MHz,  $\text{CDCl}_3$ )  $\delta$  28. HRMS (ESI):  $m/z$  calcd. for  $[\text{C}_{23}\text{H}_{44}\text{BO}_2]^+$  363.34289, found 363.34210.

### Determination of the stereochemistry of 3n using a NOESY spectrum

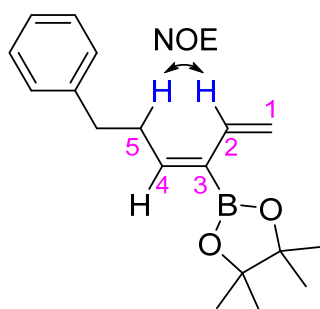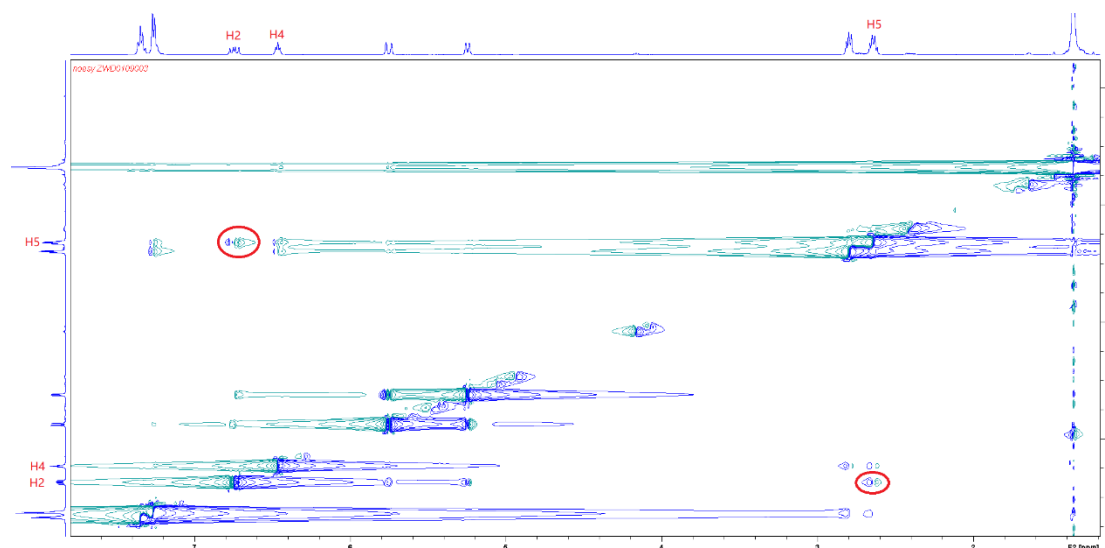

Figure S1. Observed NOESY effect between the C2 proton and C5 proton

The NOESY experiment (Figure S1) indicated a through space NOE effect between C2-H and C5-H. This indicates that C2-H and C5-H are close in space, and the C3-C4 double bond has an Z geometry.

References:

1. K. Semba, T. Fujihara, J. Terao and Y. Tsuji, *Angew. Chem. Int. Ed.*, 2013, **52**, 12400-12403.
2. H. Wang, B. Beiring, D.-G. Yu, K. D. Collins and F. Glorius, *Angew. Chem. Int. Ed.*, 2013, **52**, 12430-12434.

# NMR Spectra of 1 and 3

ZWD0033005CLM

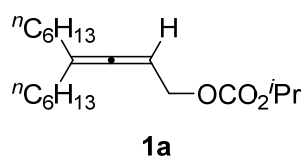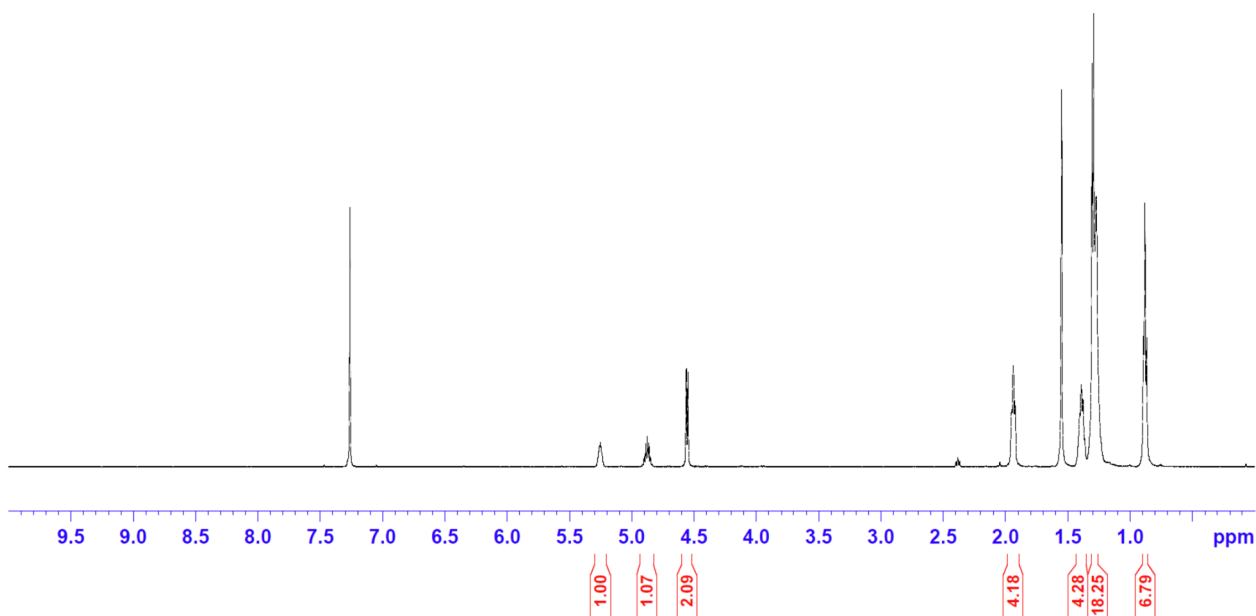

202.82 154.55 106.71 87.15 77.25 77.00 76.74 71.76 66.66 32.25 31.69 28.94 27.41 22.62 21.78 14.07

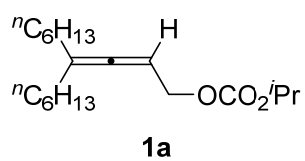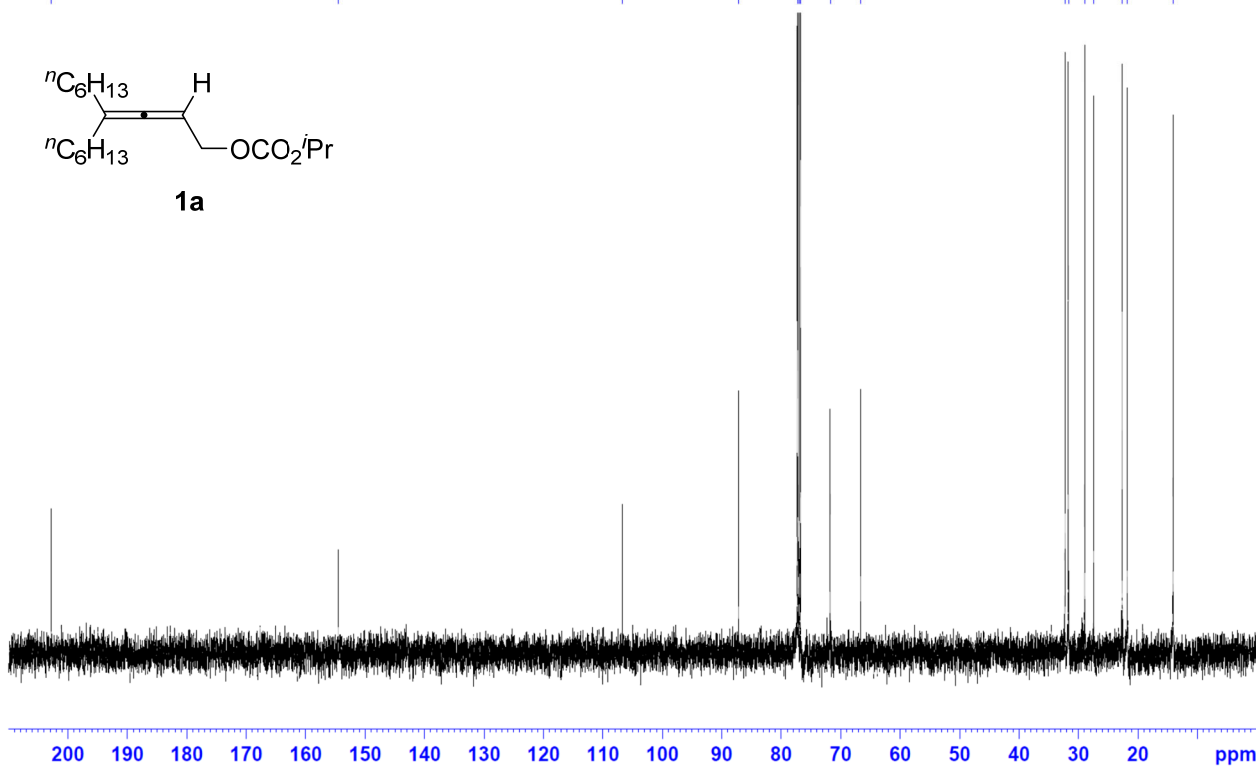

ZWD0099002CLM

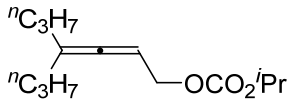

**1b**

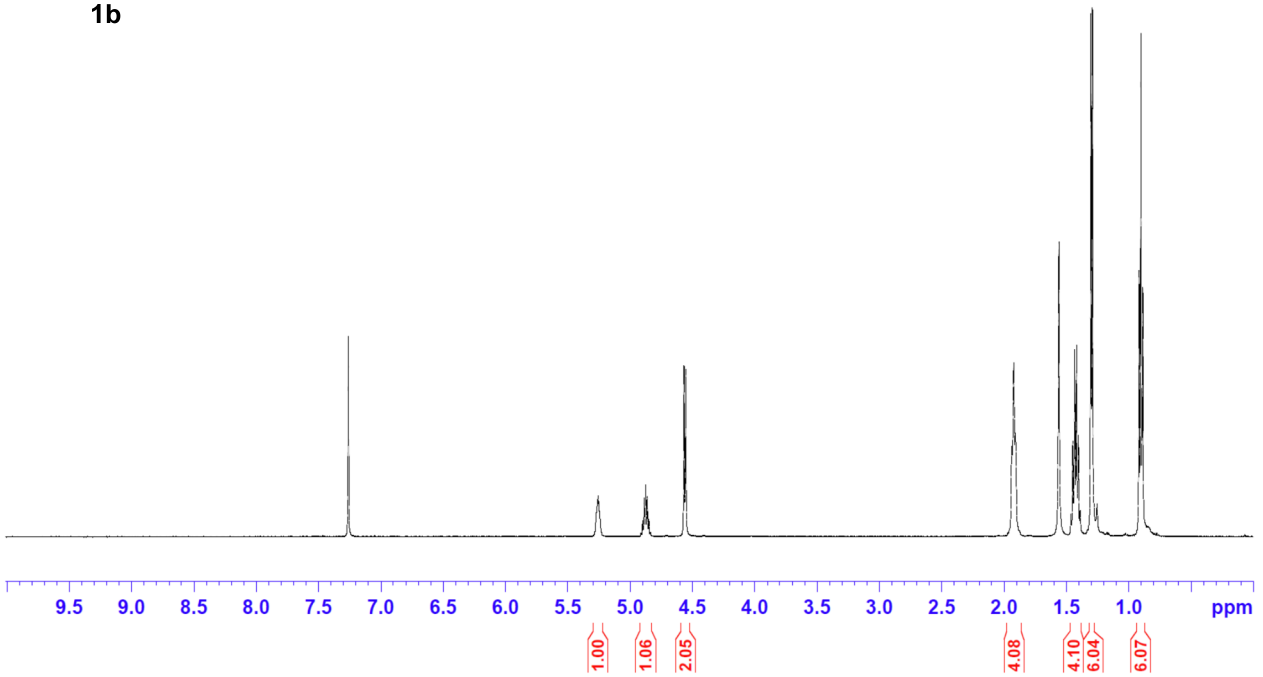

ZWD0099001CLM

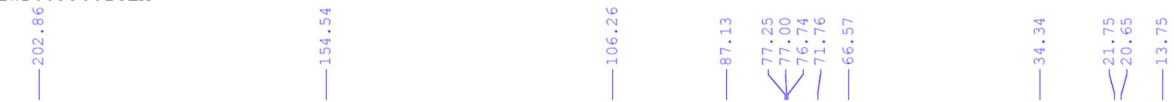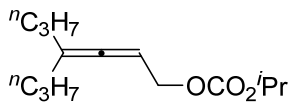

**1b**

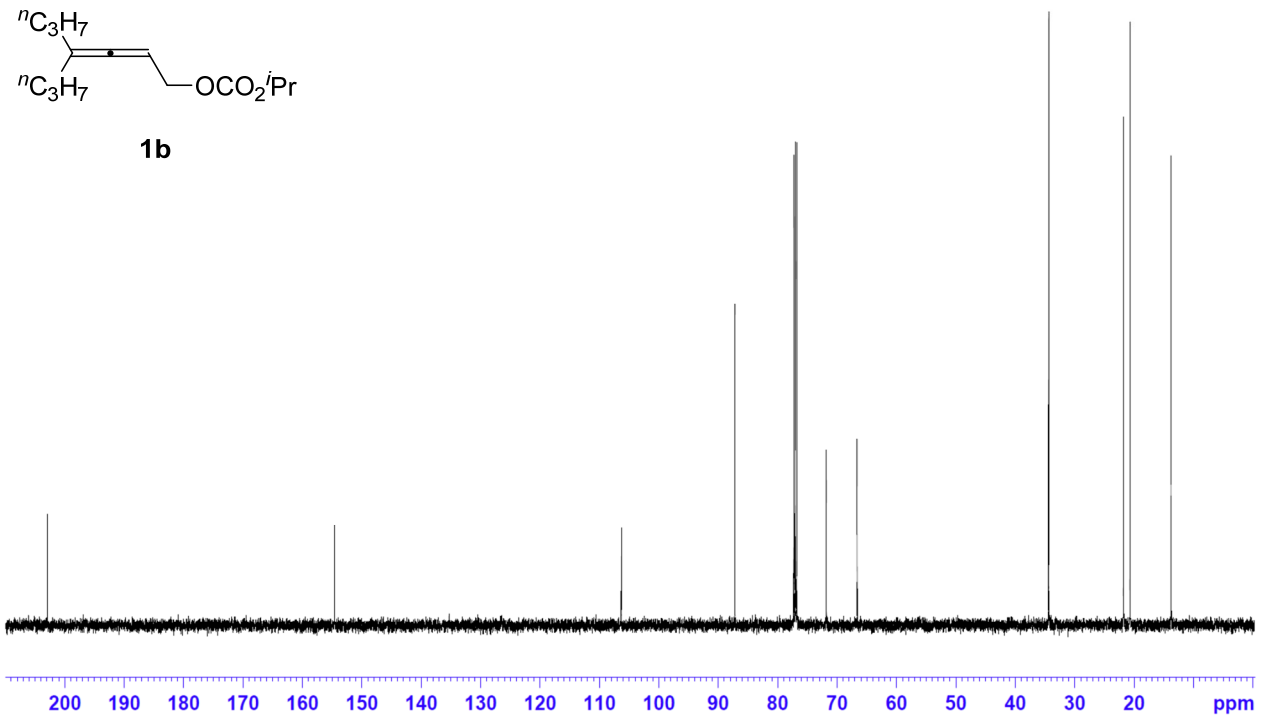

ZWD0115001CLM

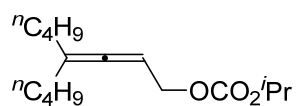

**1c**

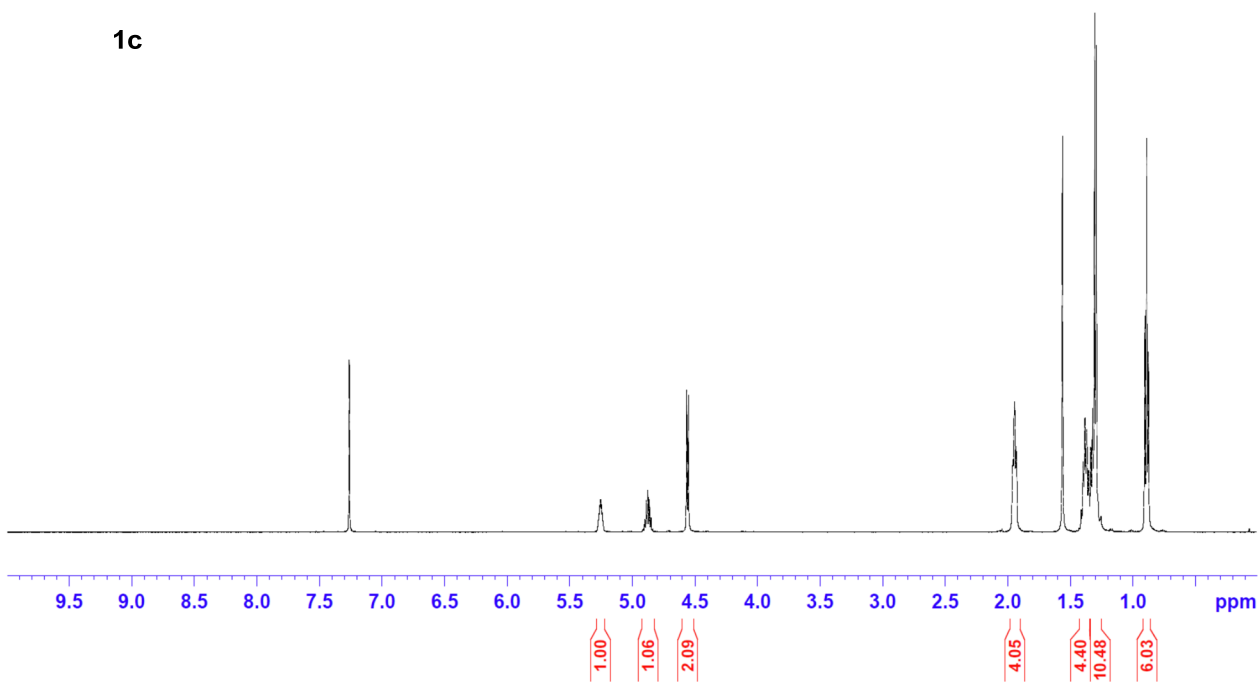

ZWD0115001-C

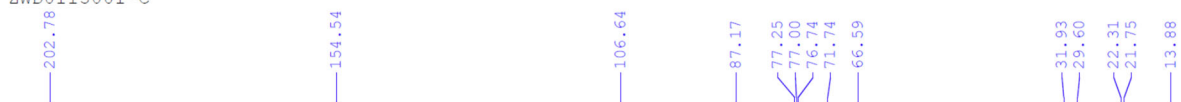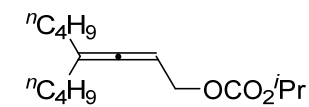

**1c**

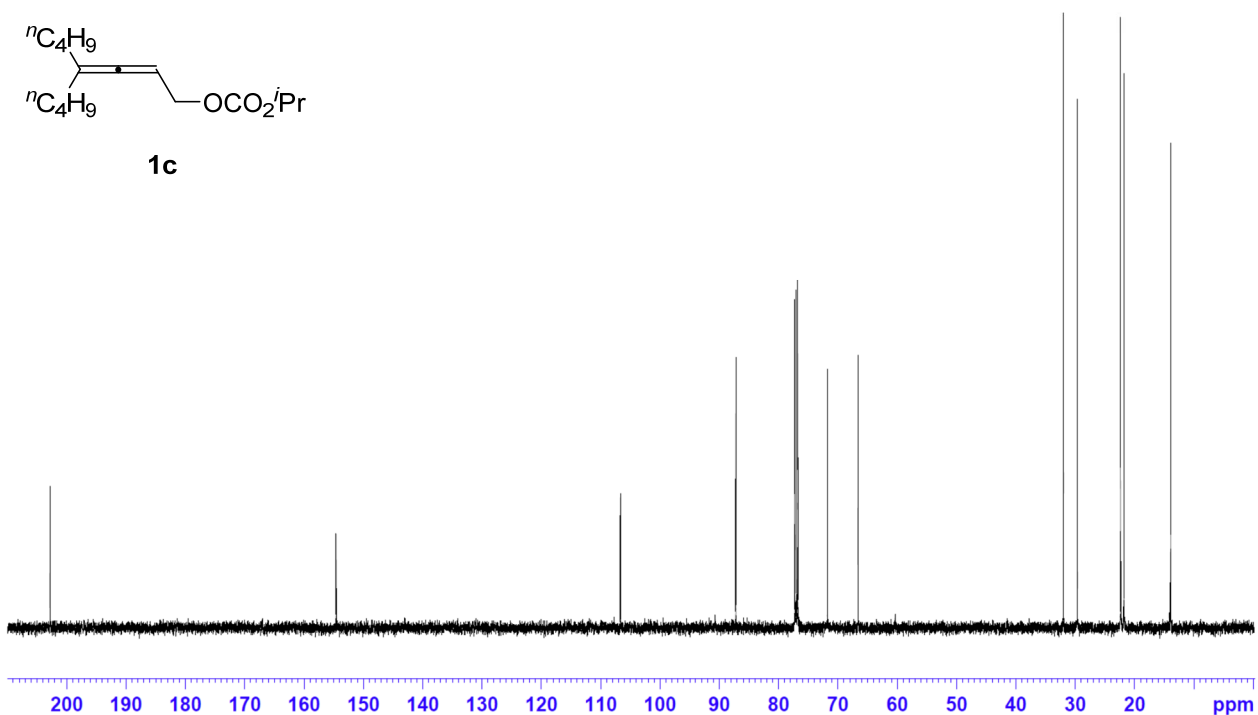

ZJY0013001

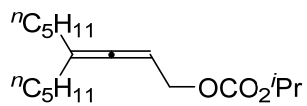

1d

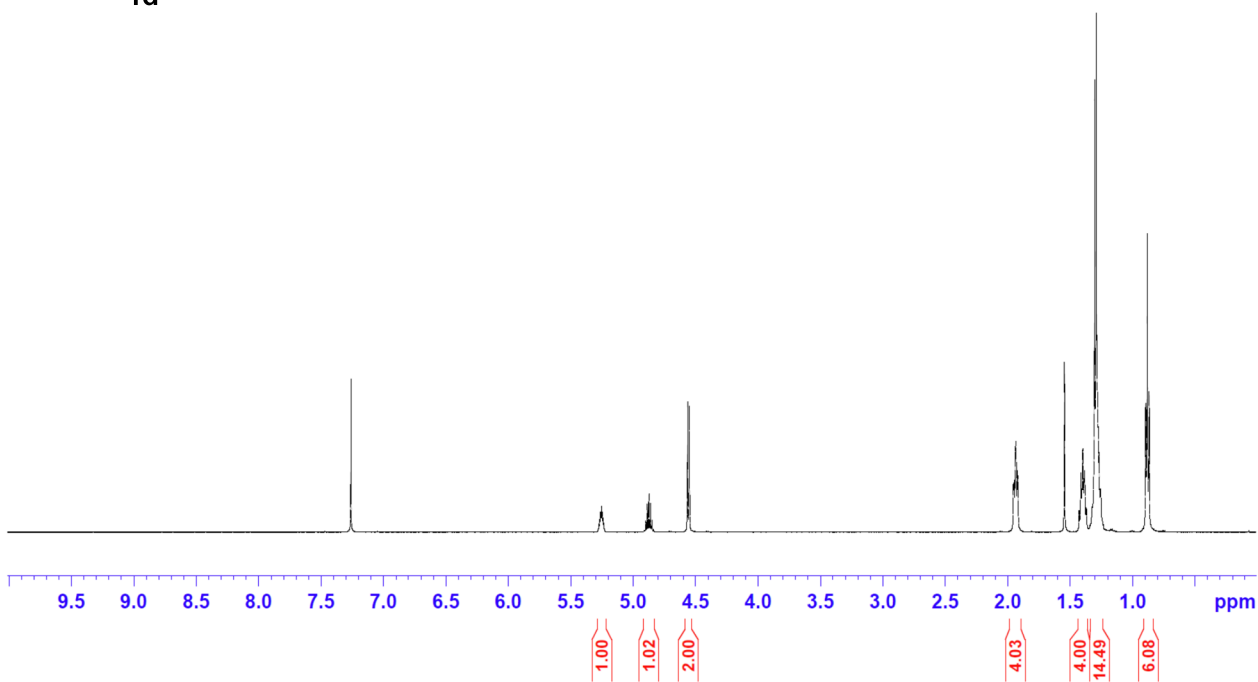

ZJY0013001CLM

202.81

154.54

106.69

87.15

77.25

76.99

76.74

71.74

66.63

32.19

31.46

27.10

22.47

21.76

14.03

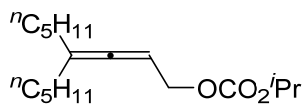

1d

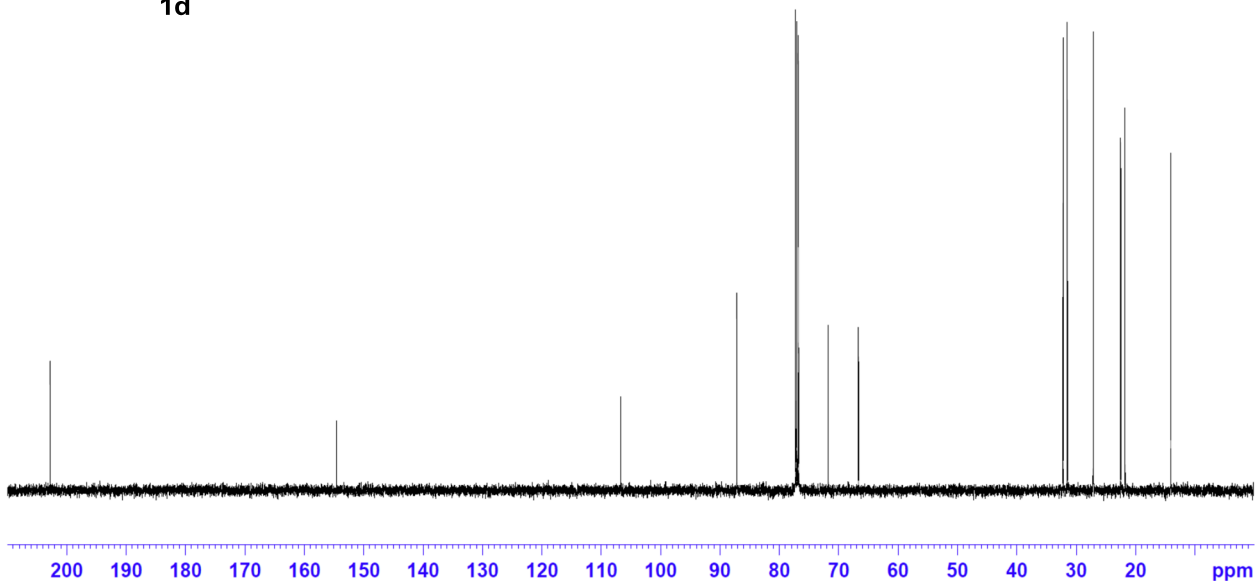

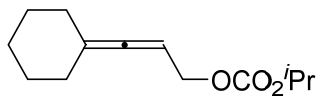

1e

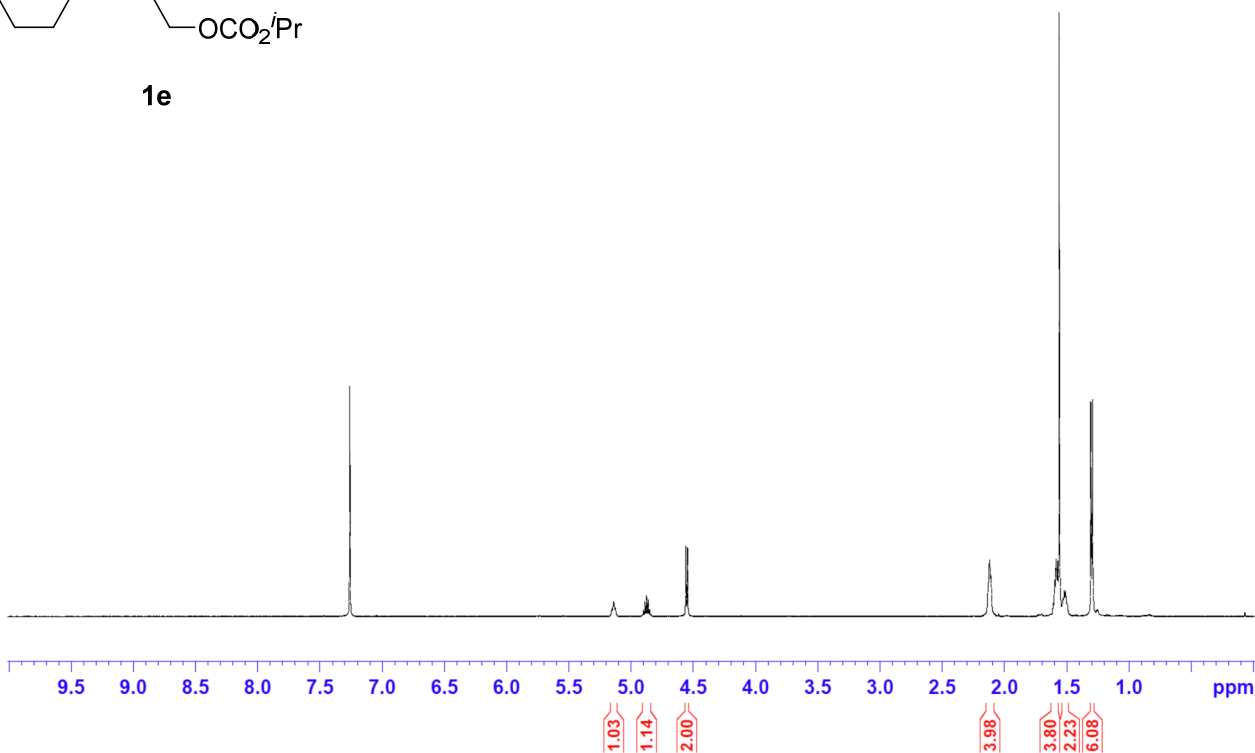

HHX0017001-C-2

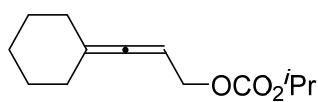

1e

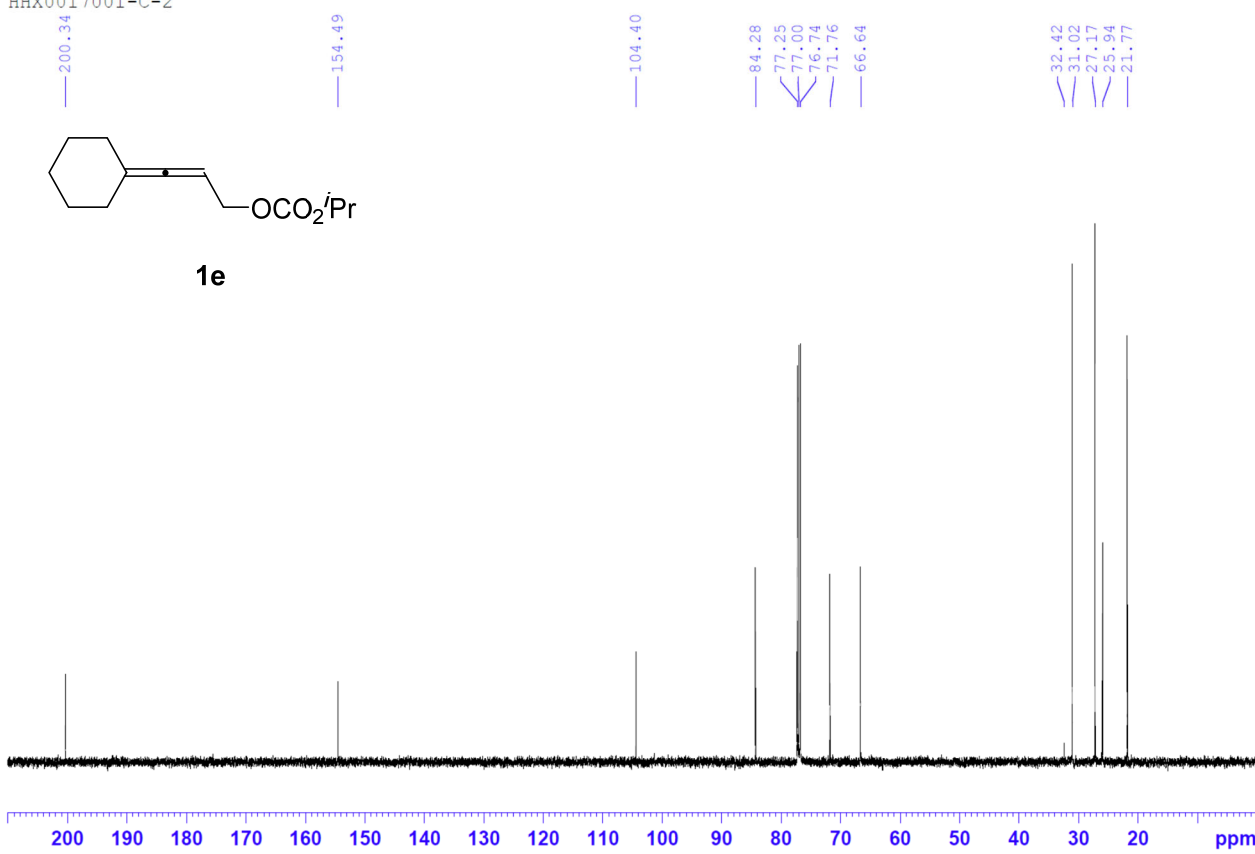

HHX0040001CLM

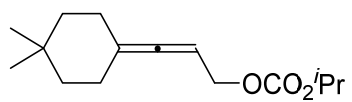

**1f**

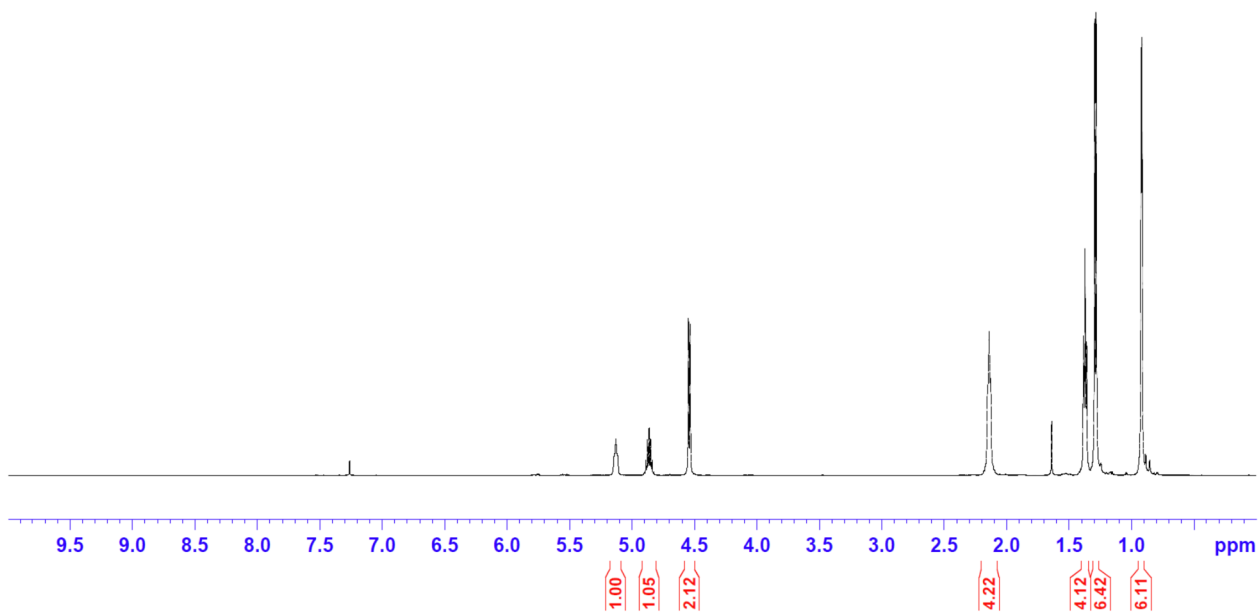

HHX0040001-C

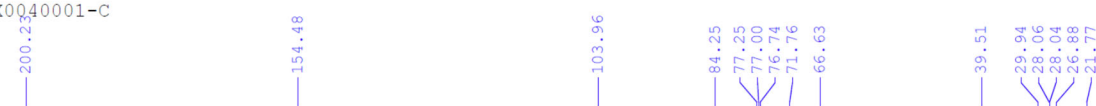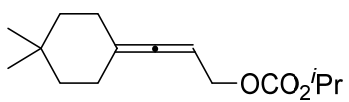

**1f**

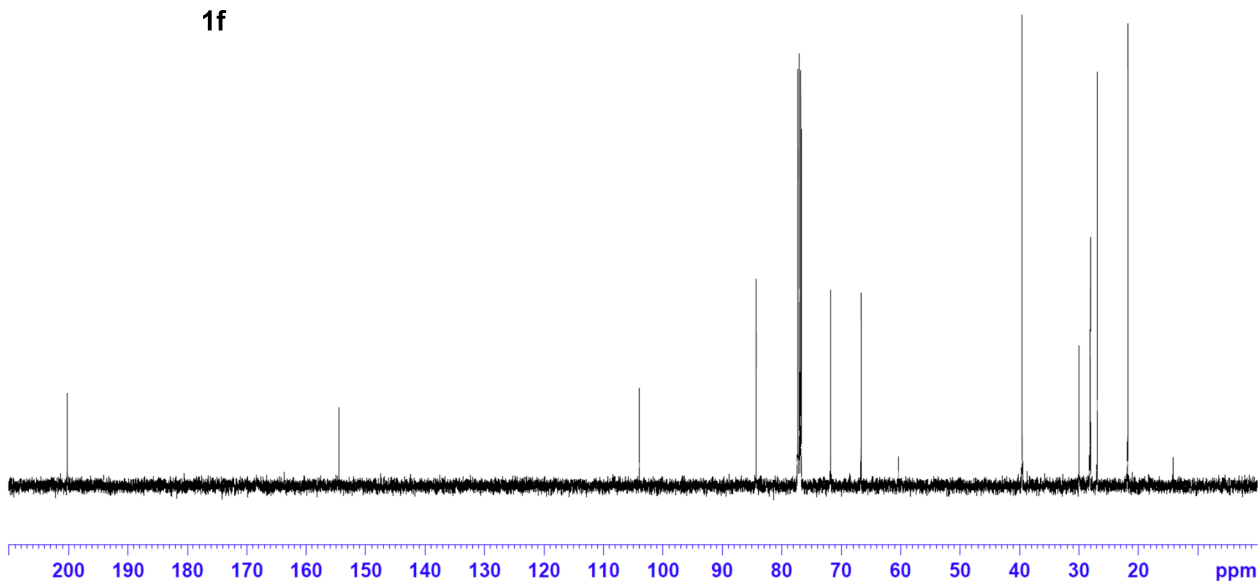



HHX0039001

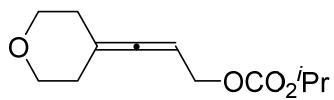

**1g**

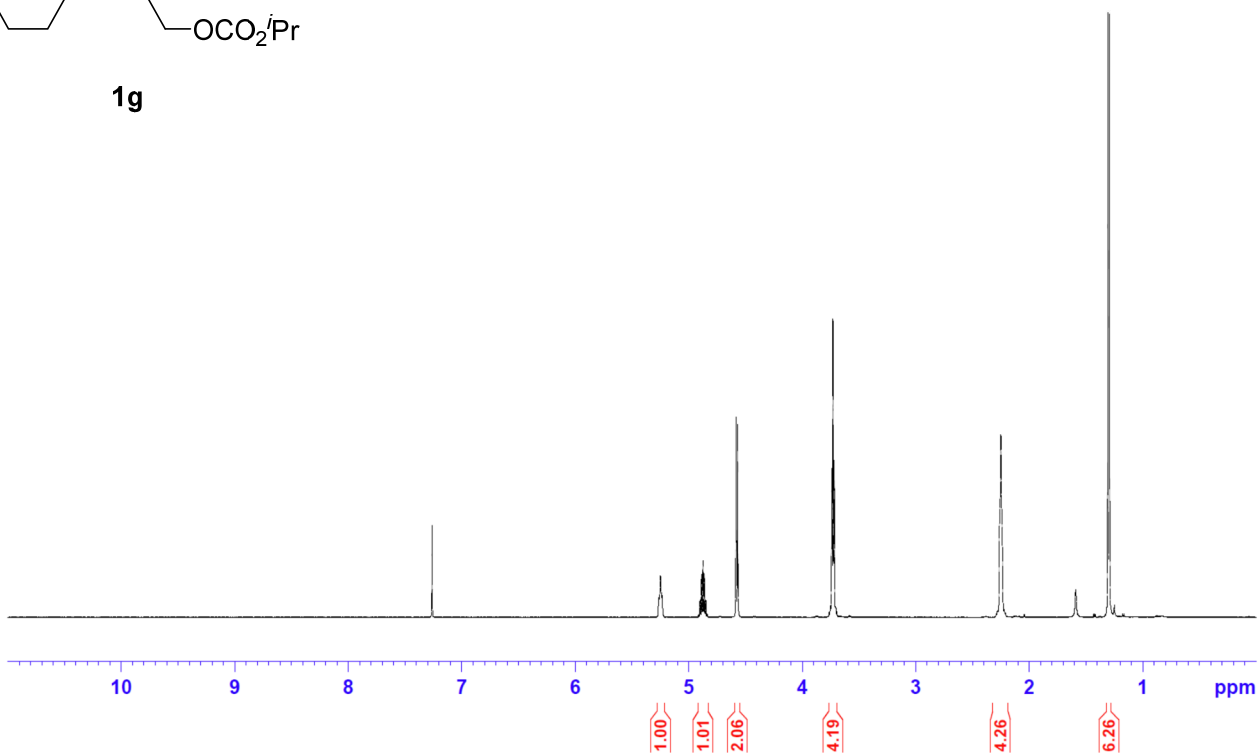

HHX0039001-C

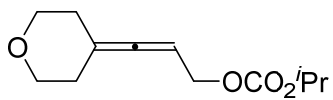

**1g**

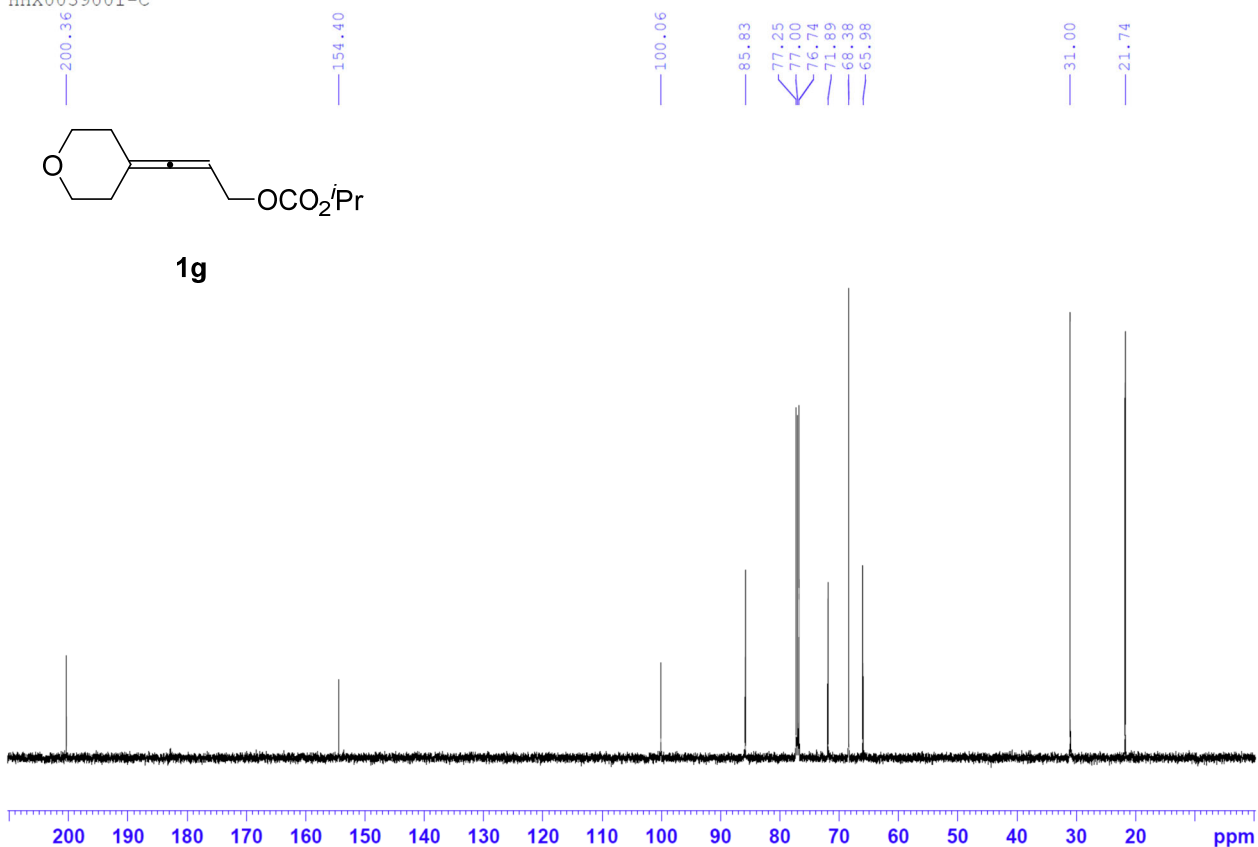

LSS0023001CLM

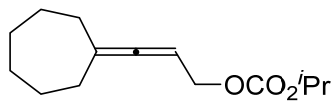

**1h**

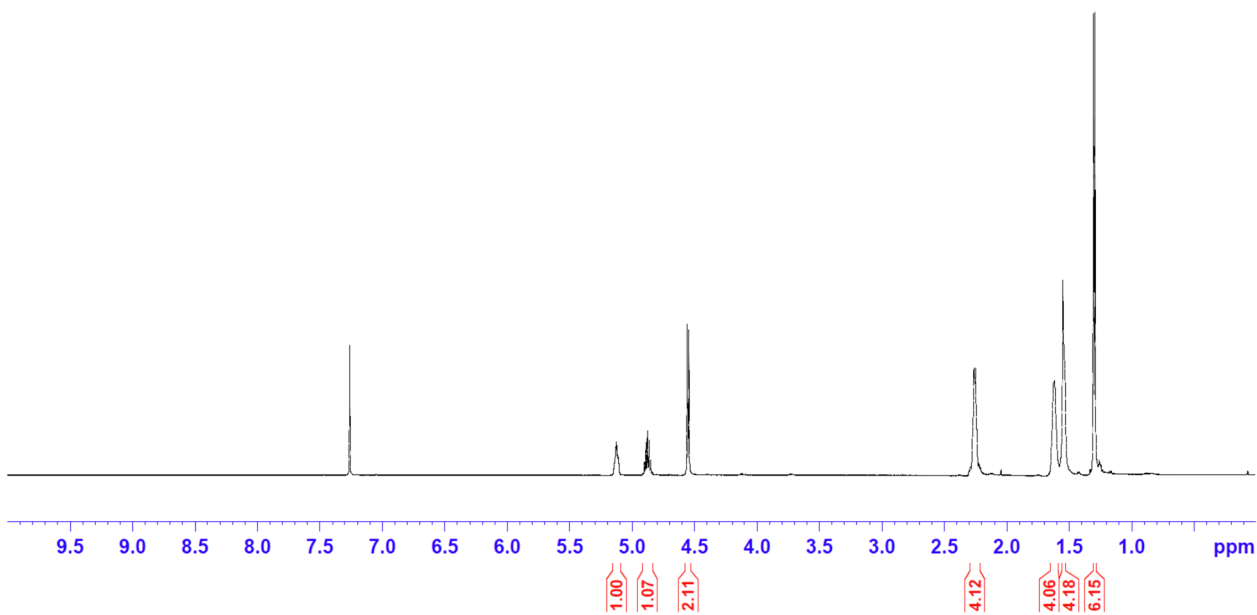

LSS0023001CLM-C

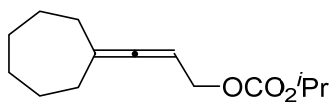

**1h**

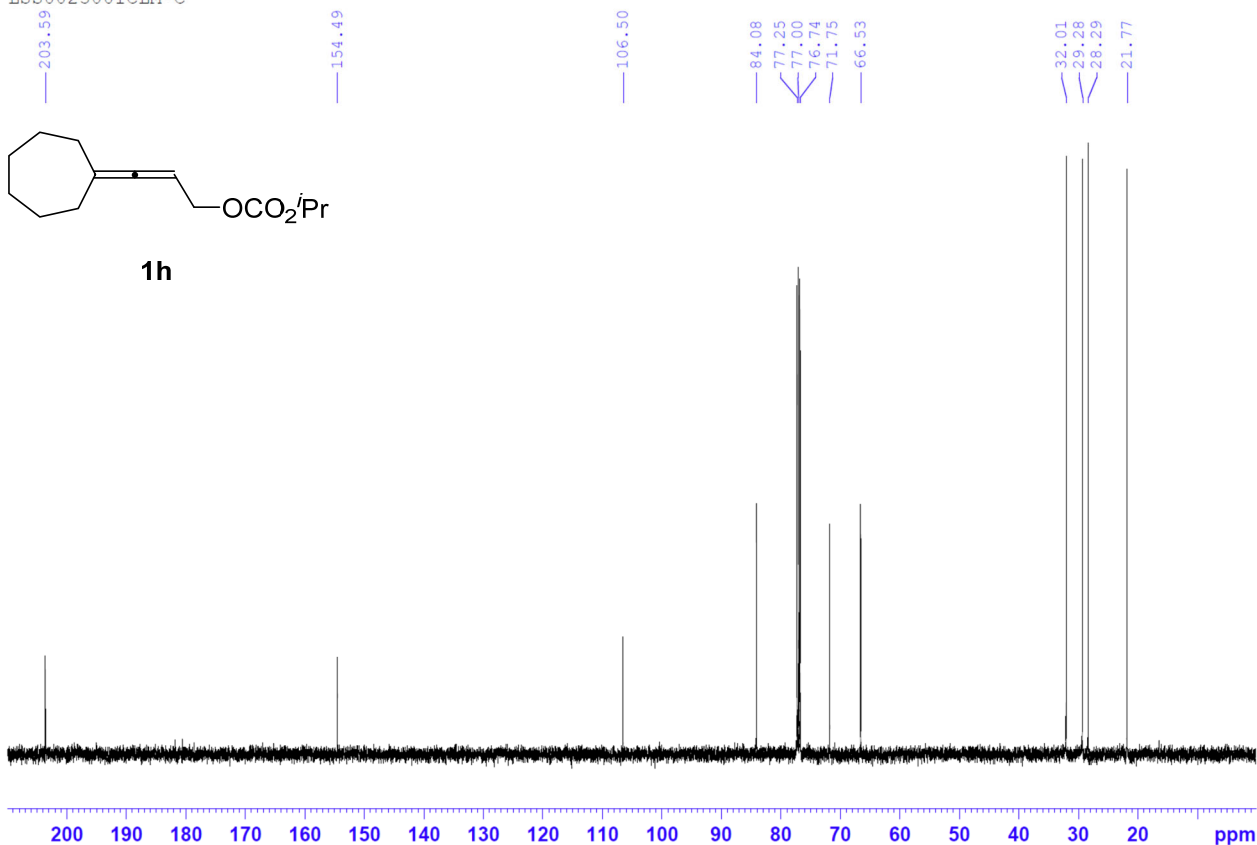

ZWD0076001CLM

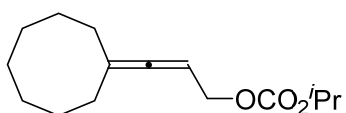

1i

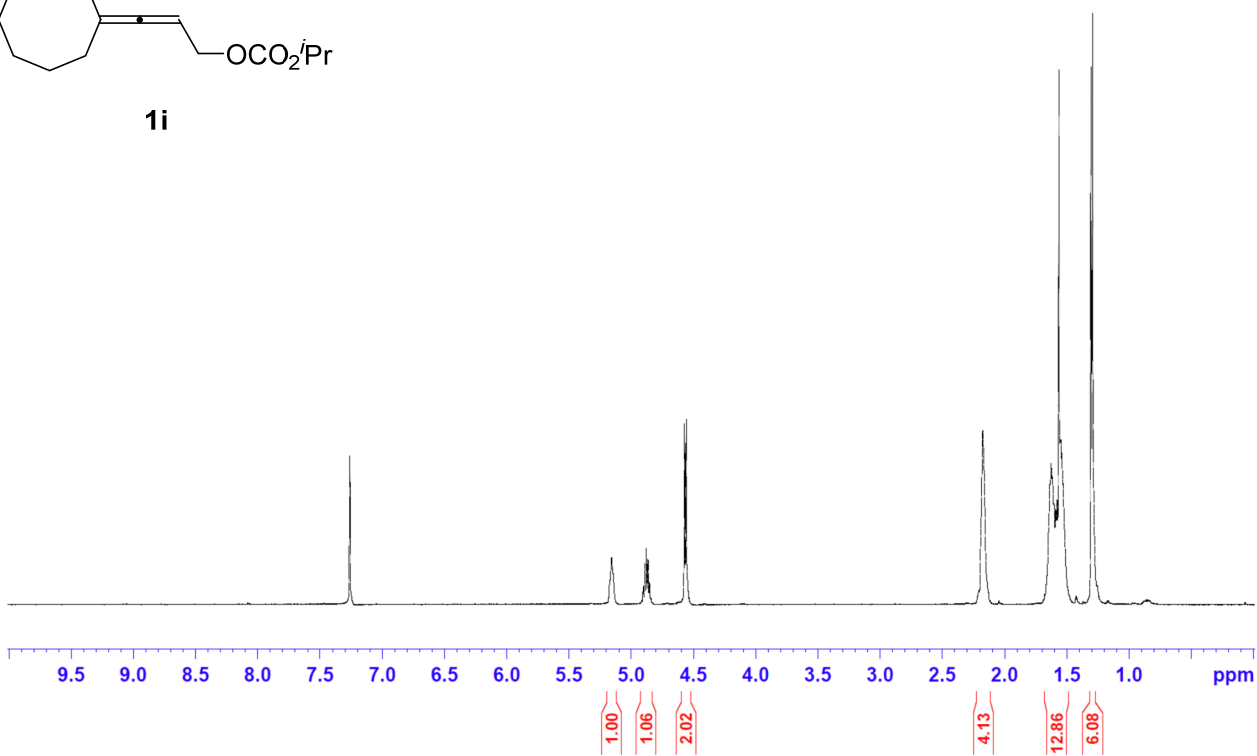

ZWD0096001CLM

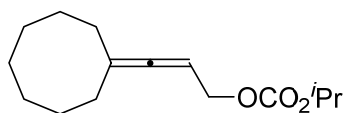

1i

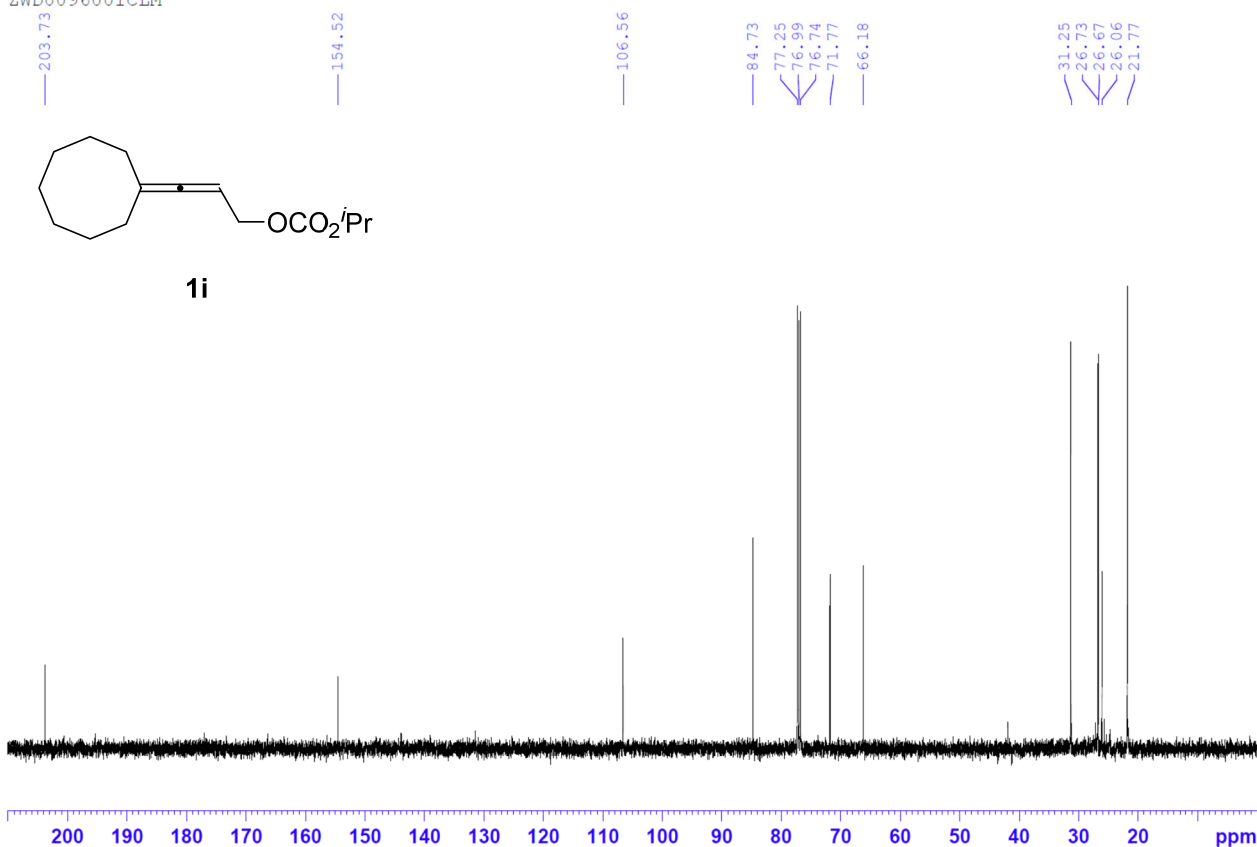

LSS0029001CLM-22

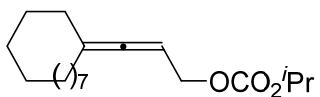

1j

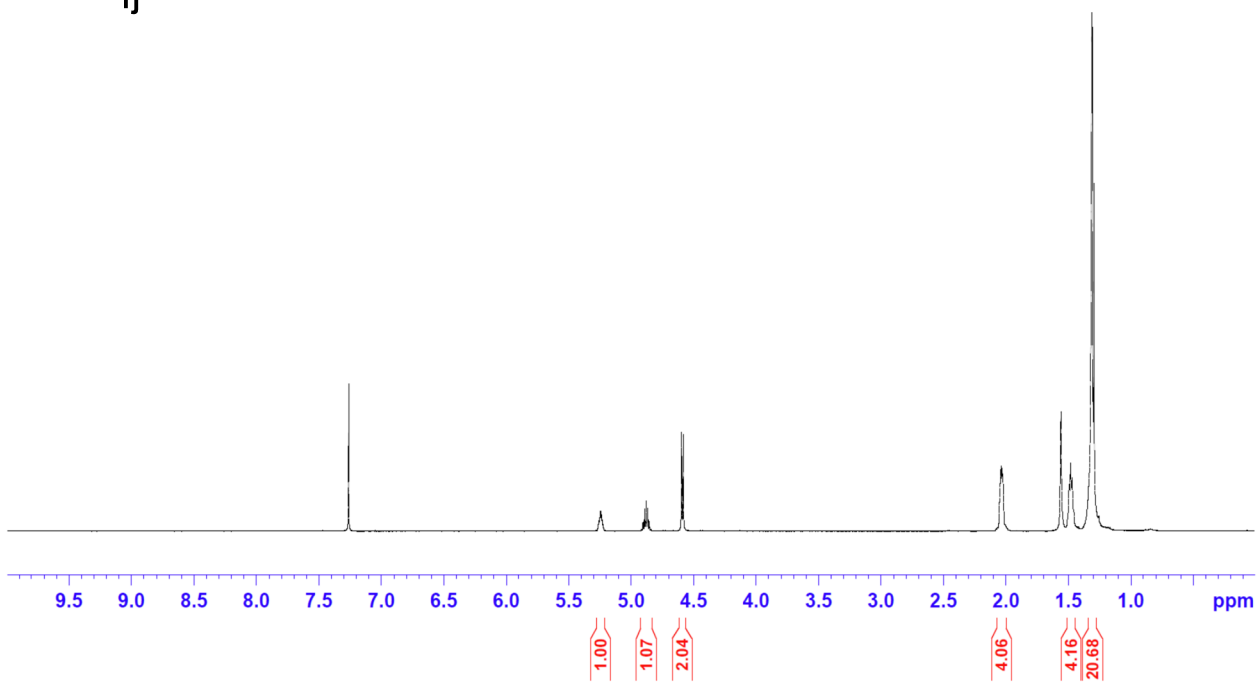

LSS0129001

203.83

154.54

103.63

86.42

77.25

77.00

76.74

71.75

66.30

29.35

24.47

24.28

23.88

22.96

22.28

21.76

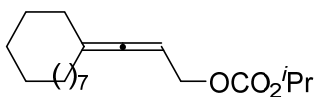

1j

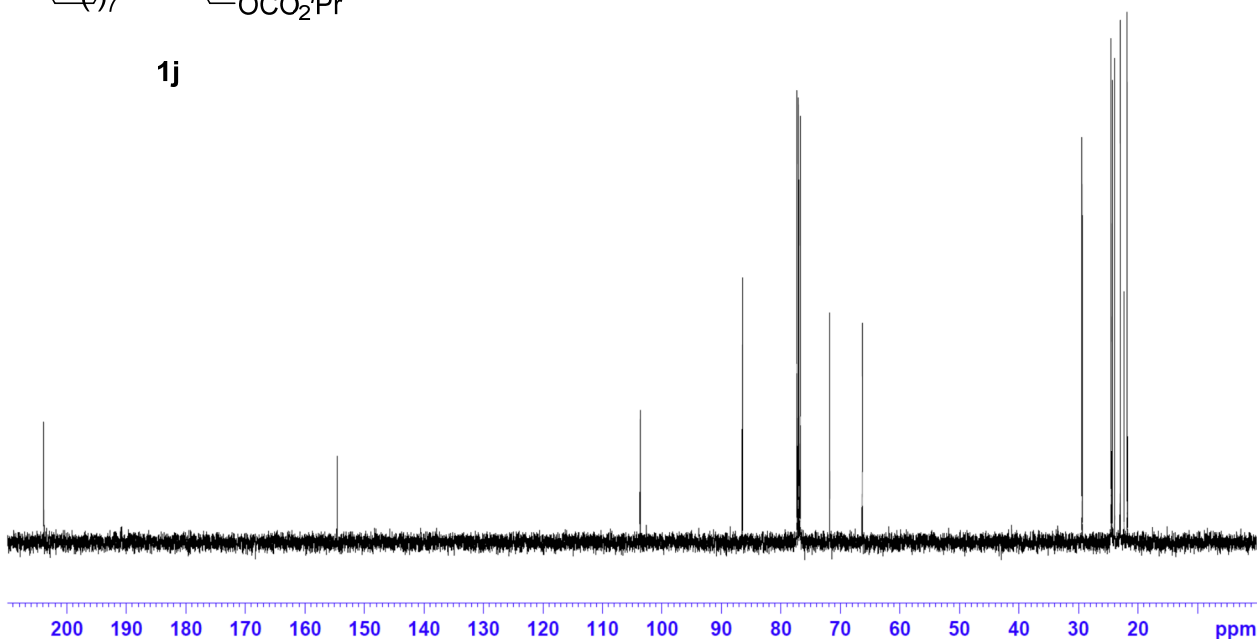

ZWD0126001CLM

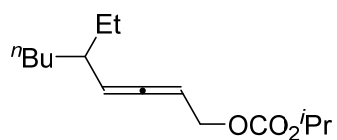

1k

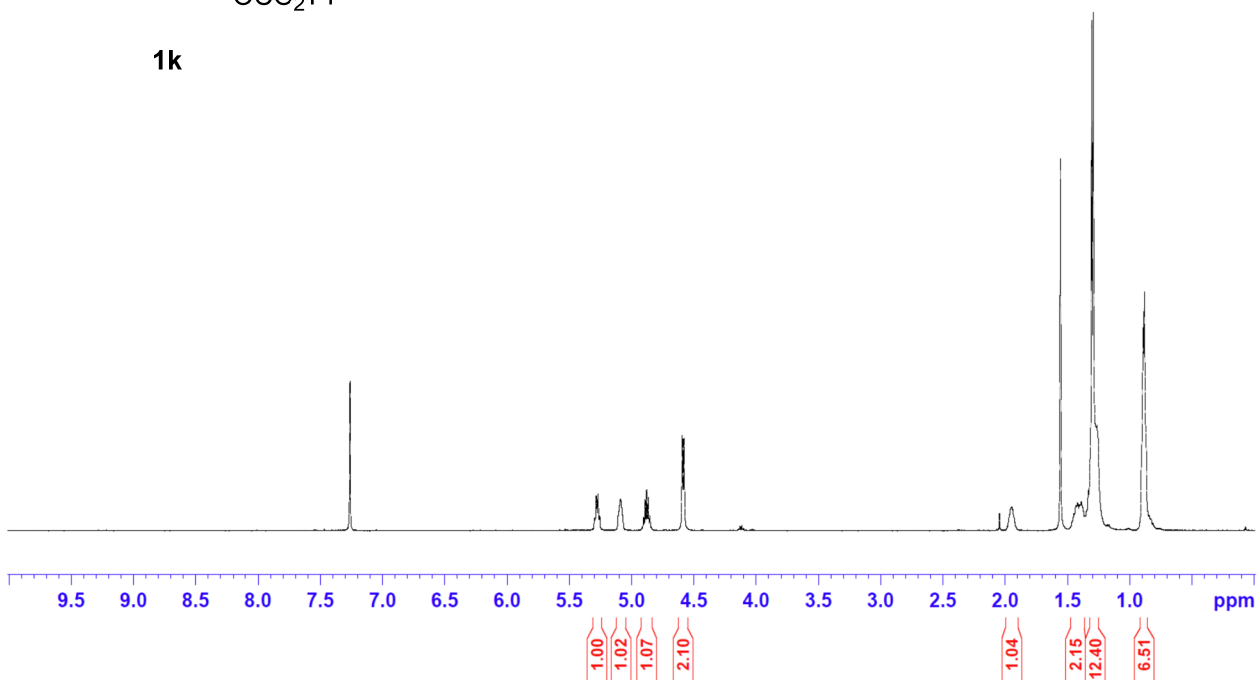

ZWD0126001-C

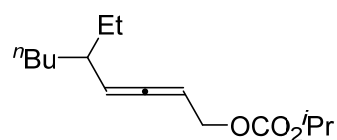

1k

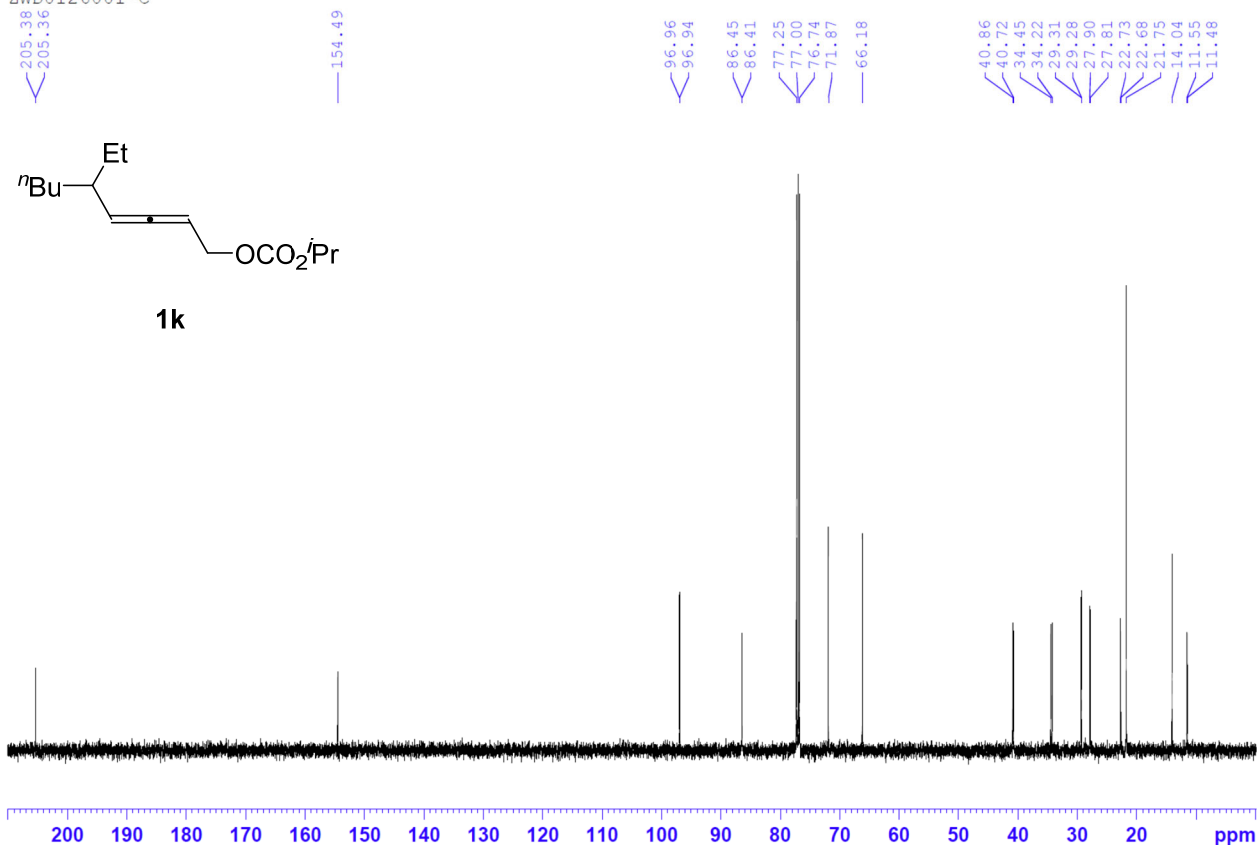

ZWD0155001CLM

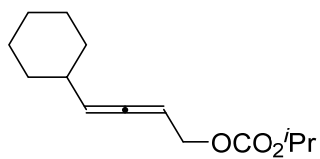

11

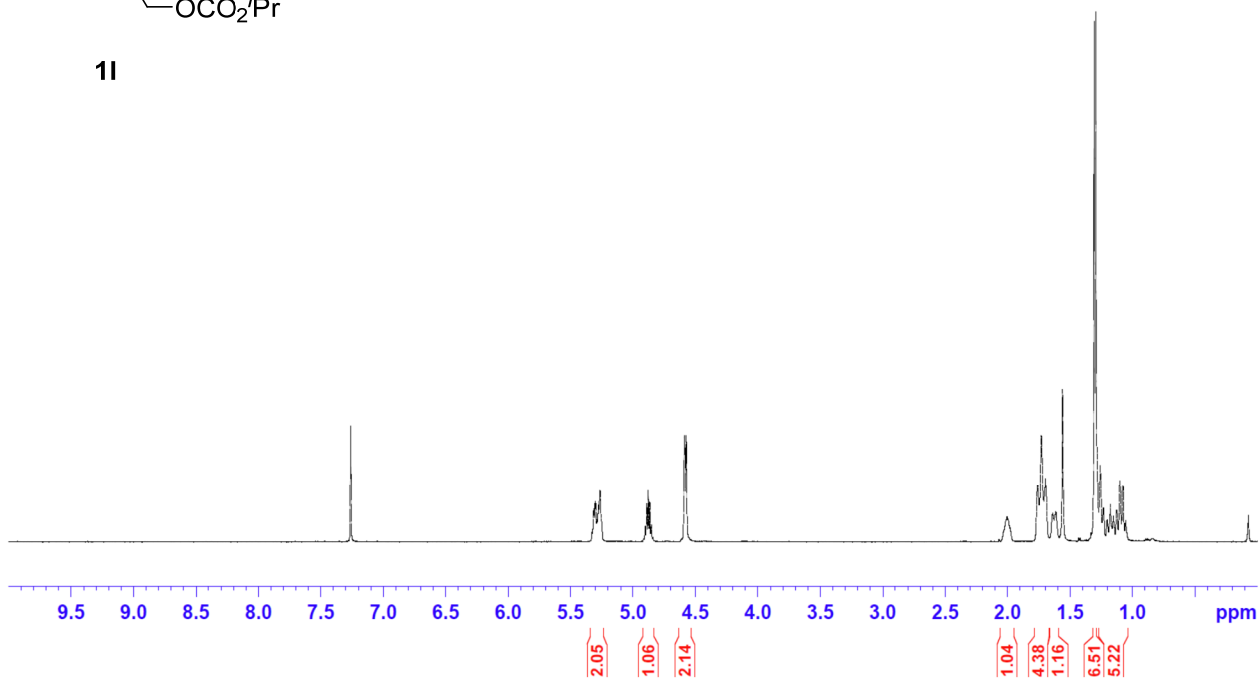

ZWD0155001-C

204.59

154.48

99.00

87.45

77.25

77.00

76.74

71.88

66.02

36.77

32.85

32.82

26.03

25.90

21.75

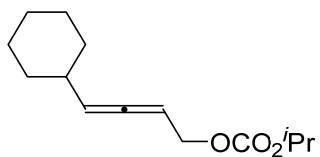

11

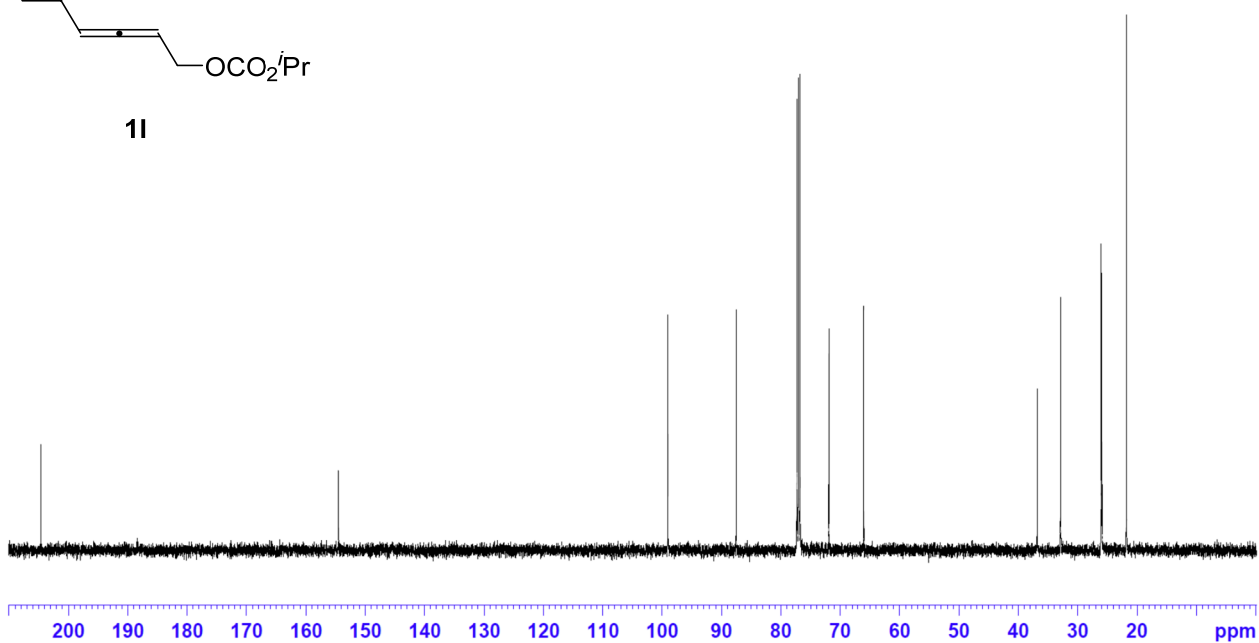

ZWD0102001CLM

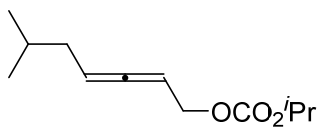

1m

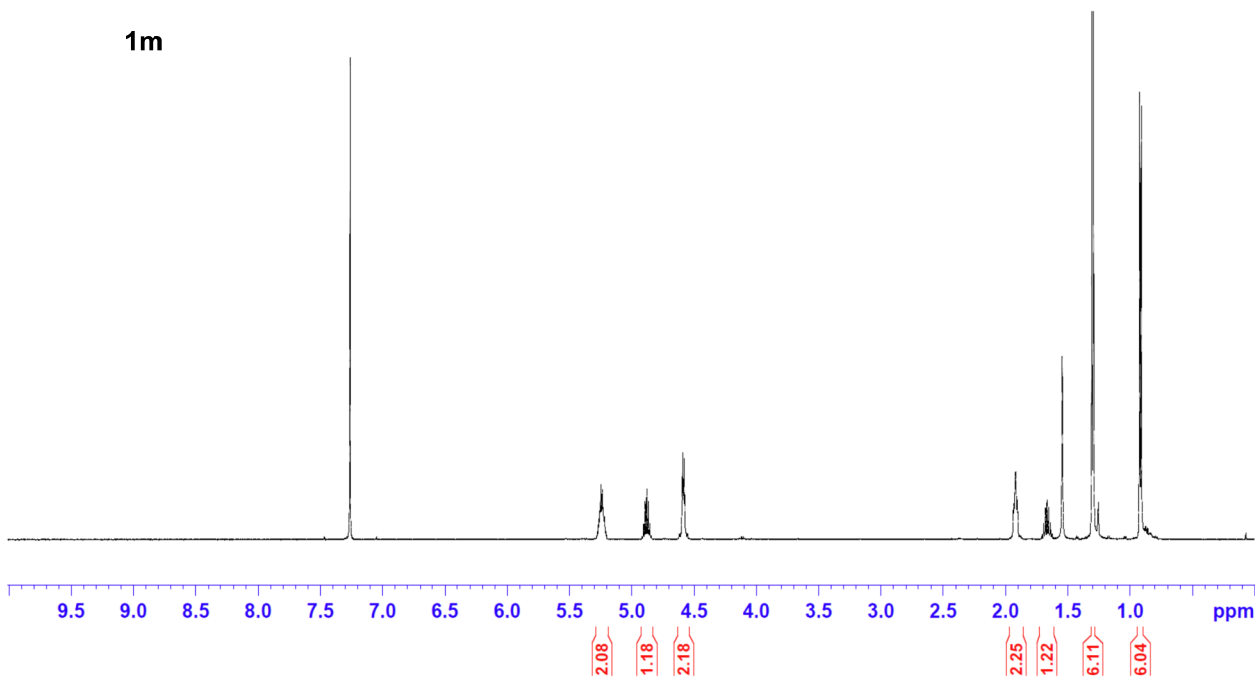

ZWD0102001CLM

206.14

154.46

91.49

85.85

77.25

77.00

76.74

71.88

65.95

37.67

28.28

22.11

22.06

21.74

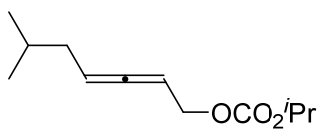

1m

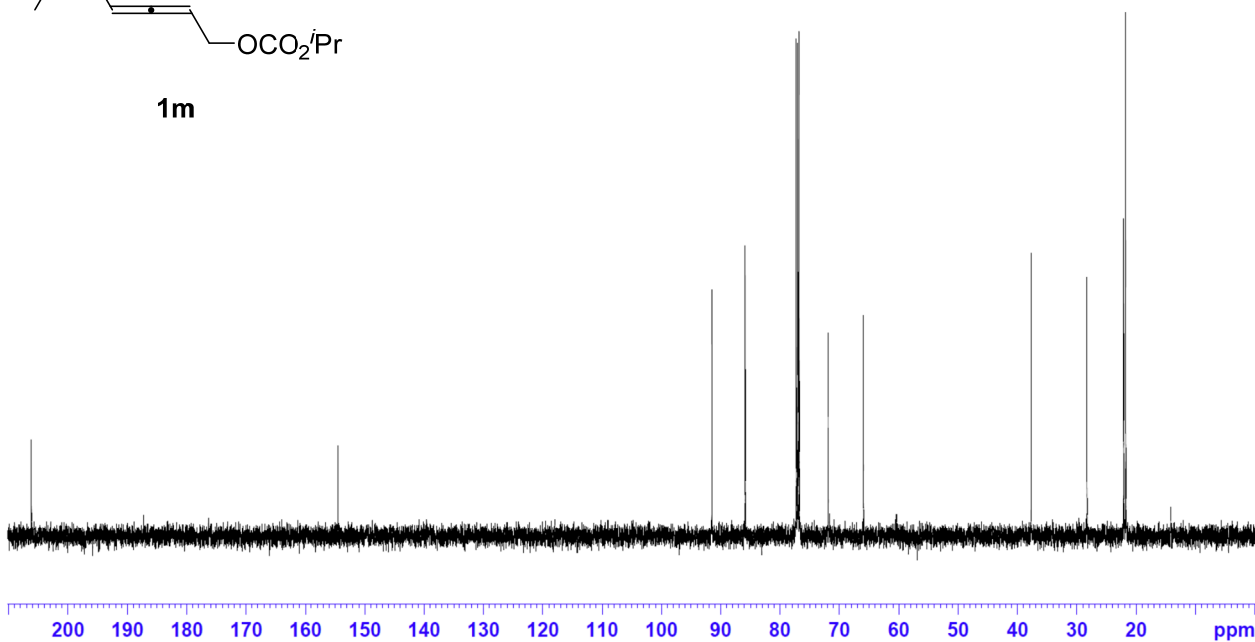

ZWD0064002

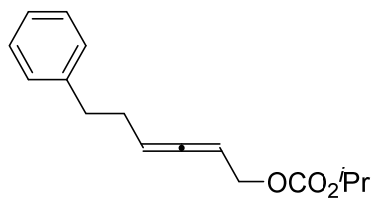

**1n**

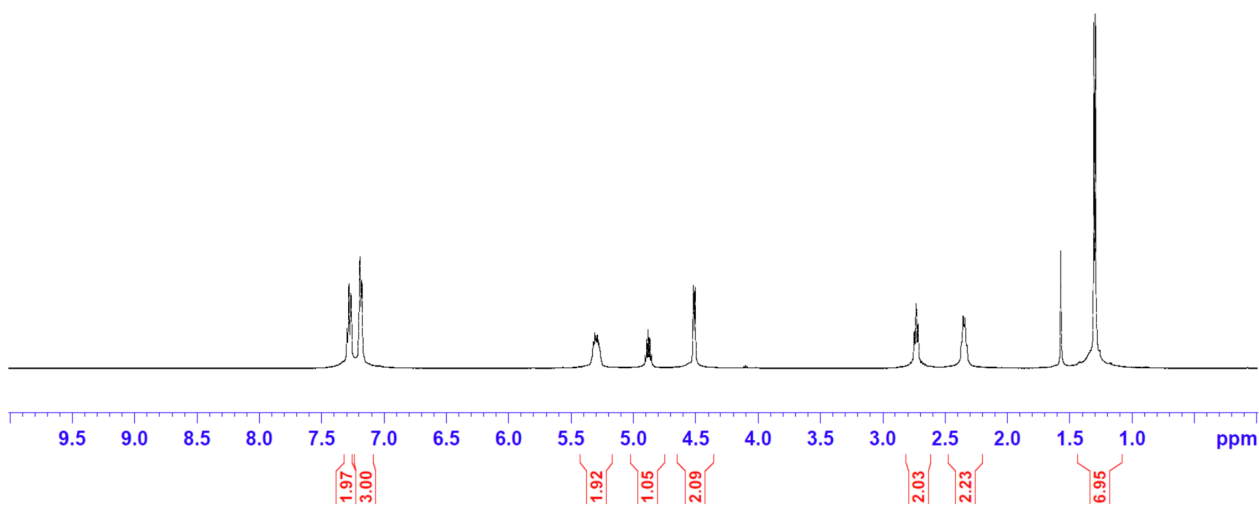

ZWD0064002-C13

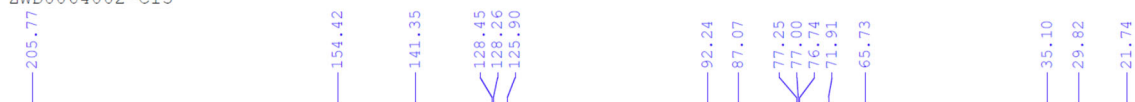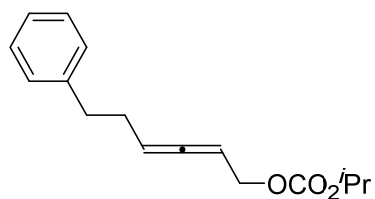

**1n**

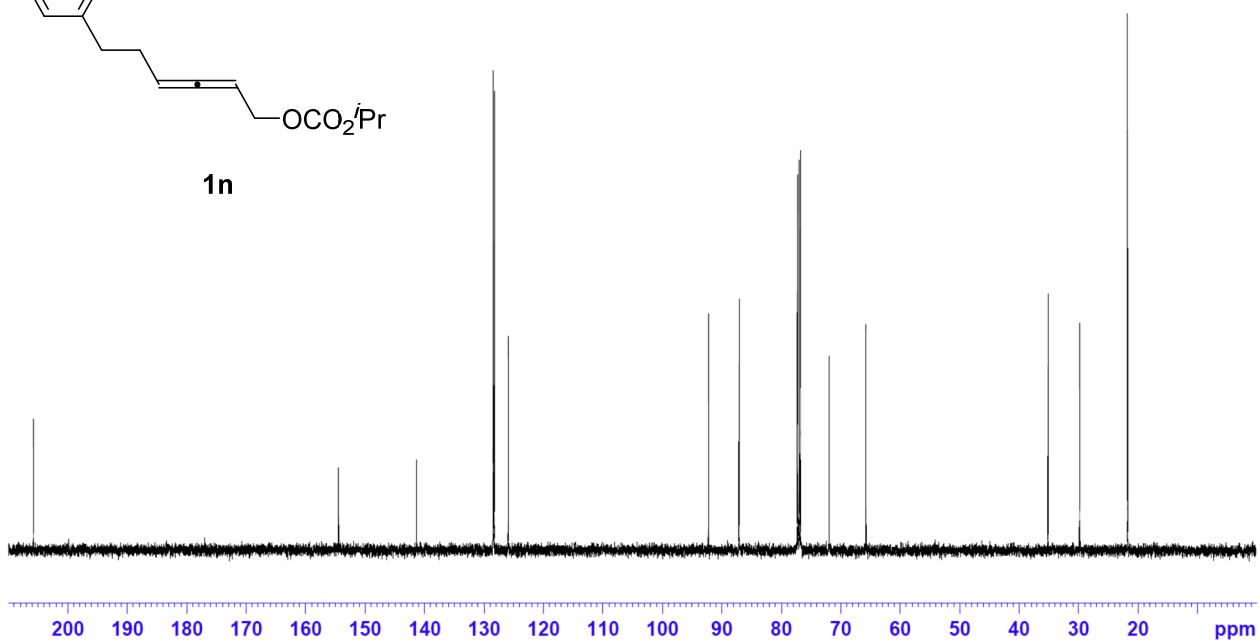



ZJY0014001CLM

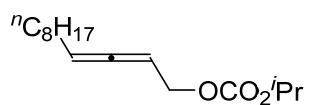

**1o**

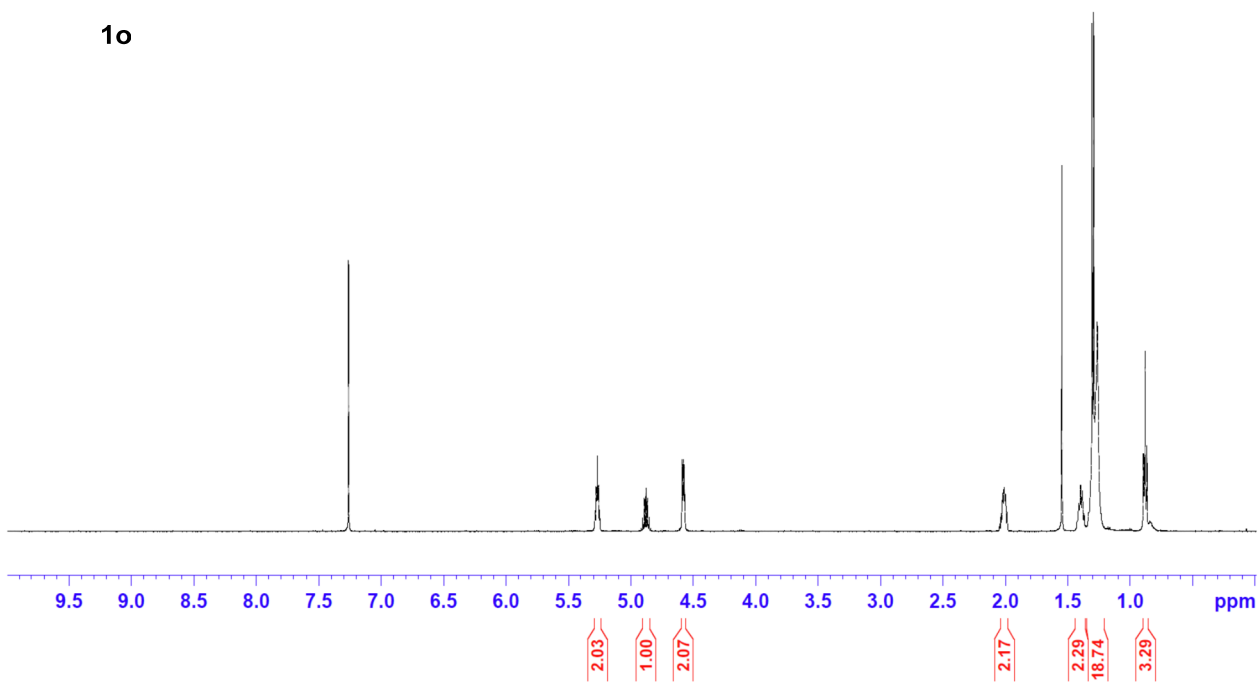

ZJY0014001CLM

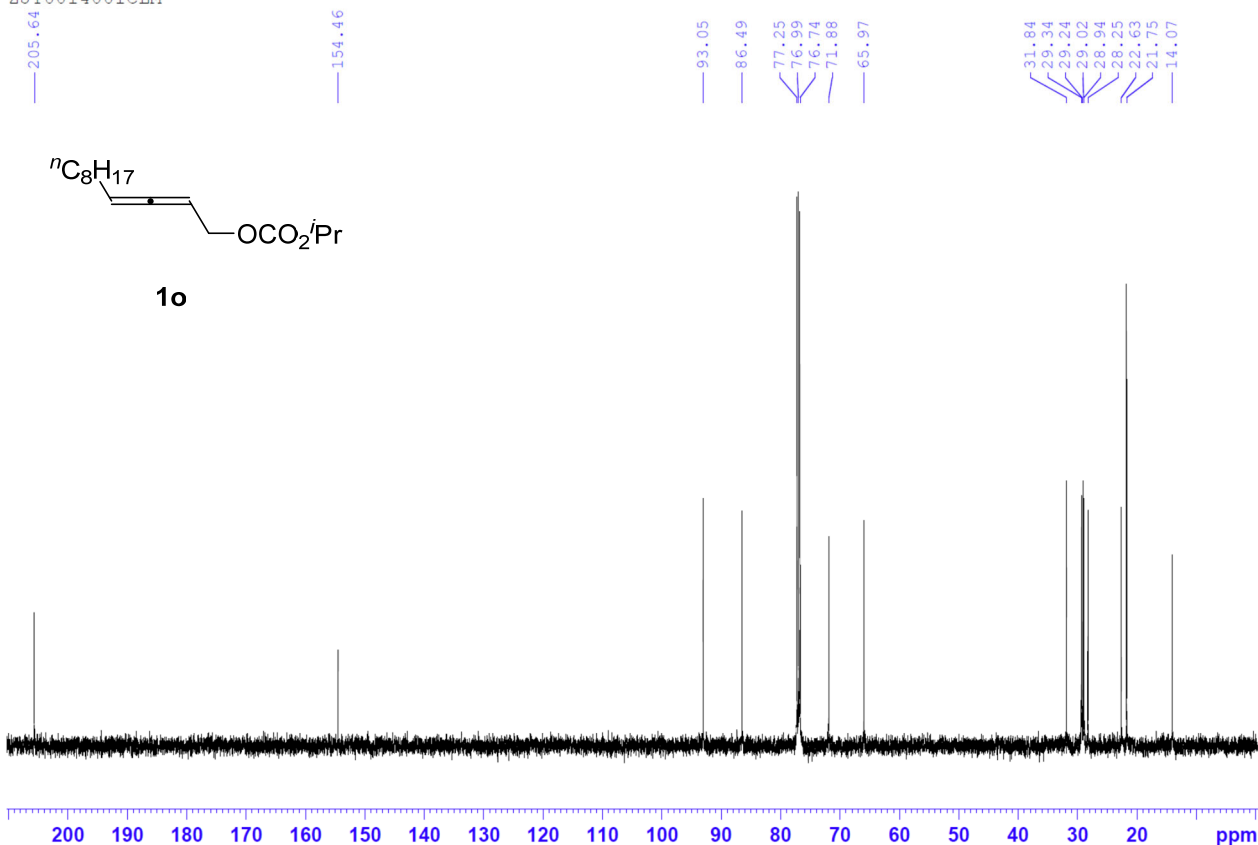

ZWD0140001

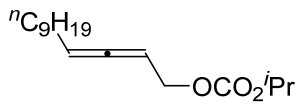

**1p**

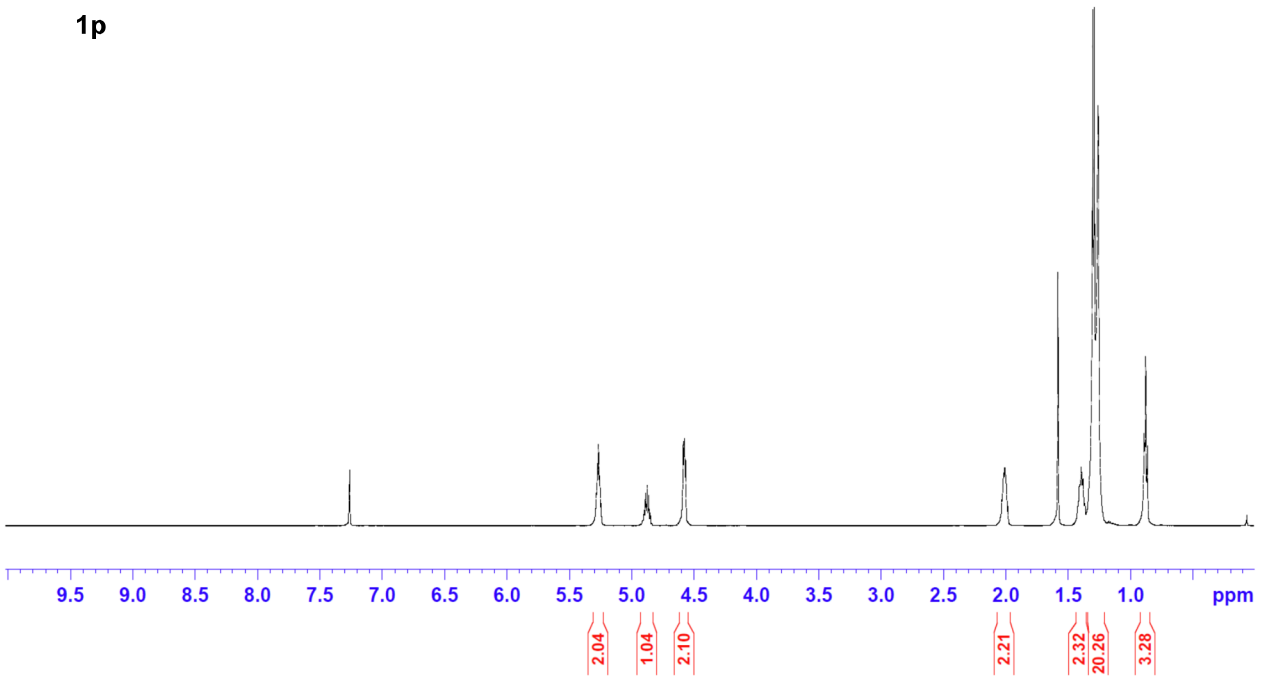

ZWD0140001CLM

205.66

154.49

93.08

86.50

77.25

77.00

76.74

71.91

66.00

31.87

29.54

29.40

29.30

29.03

28.96

28.26

22.66

21.56

14.09

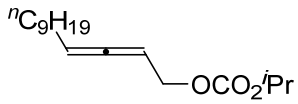

**1p**

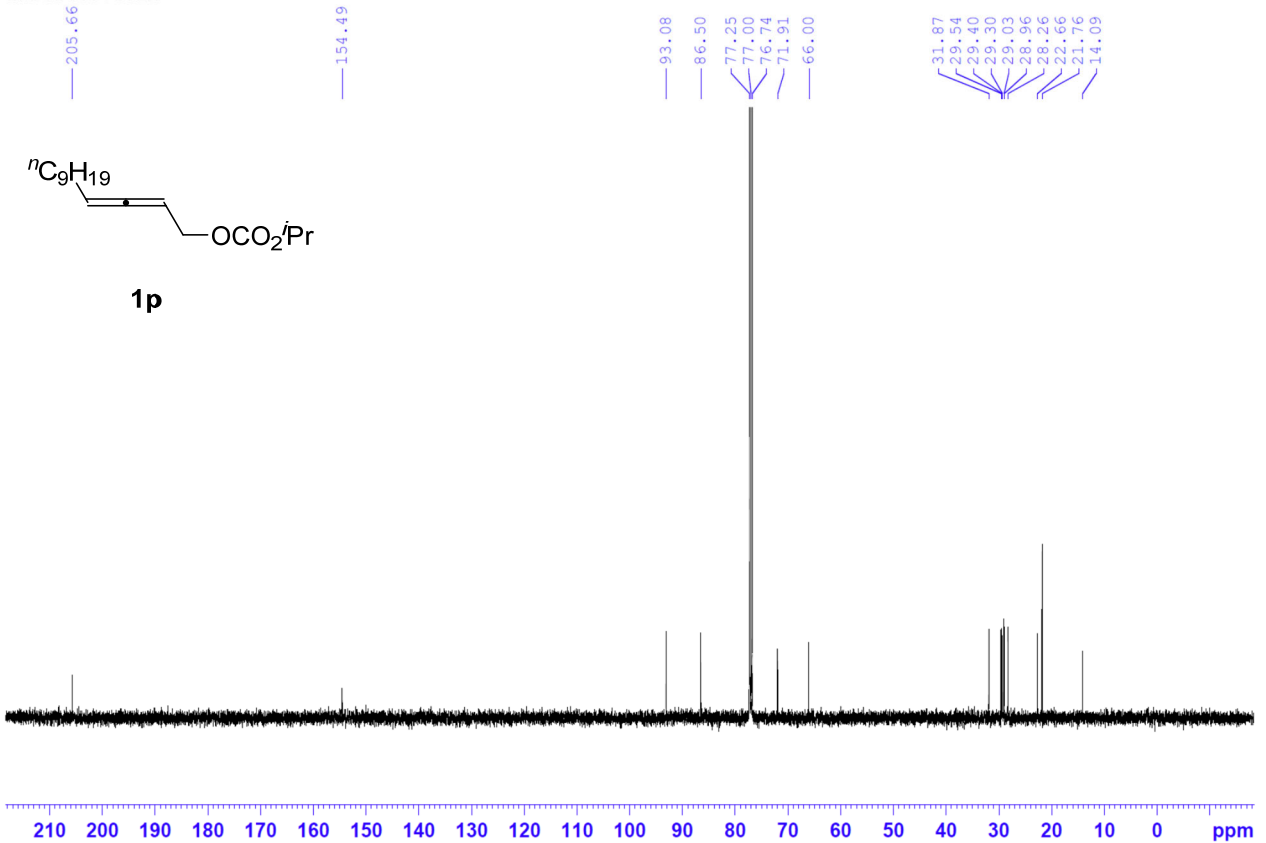

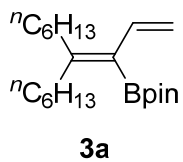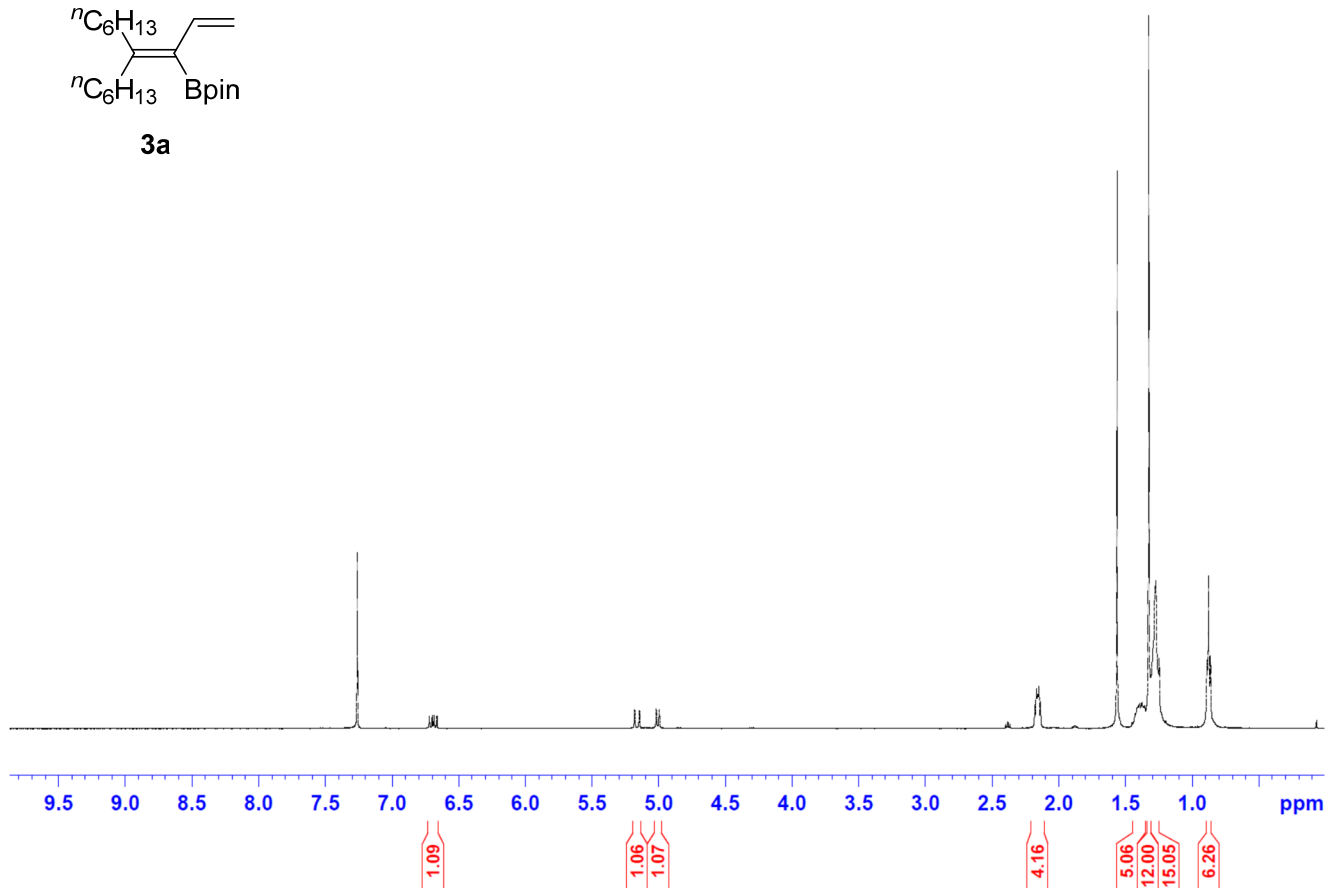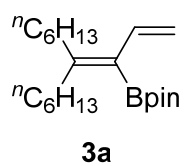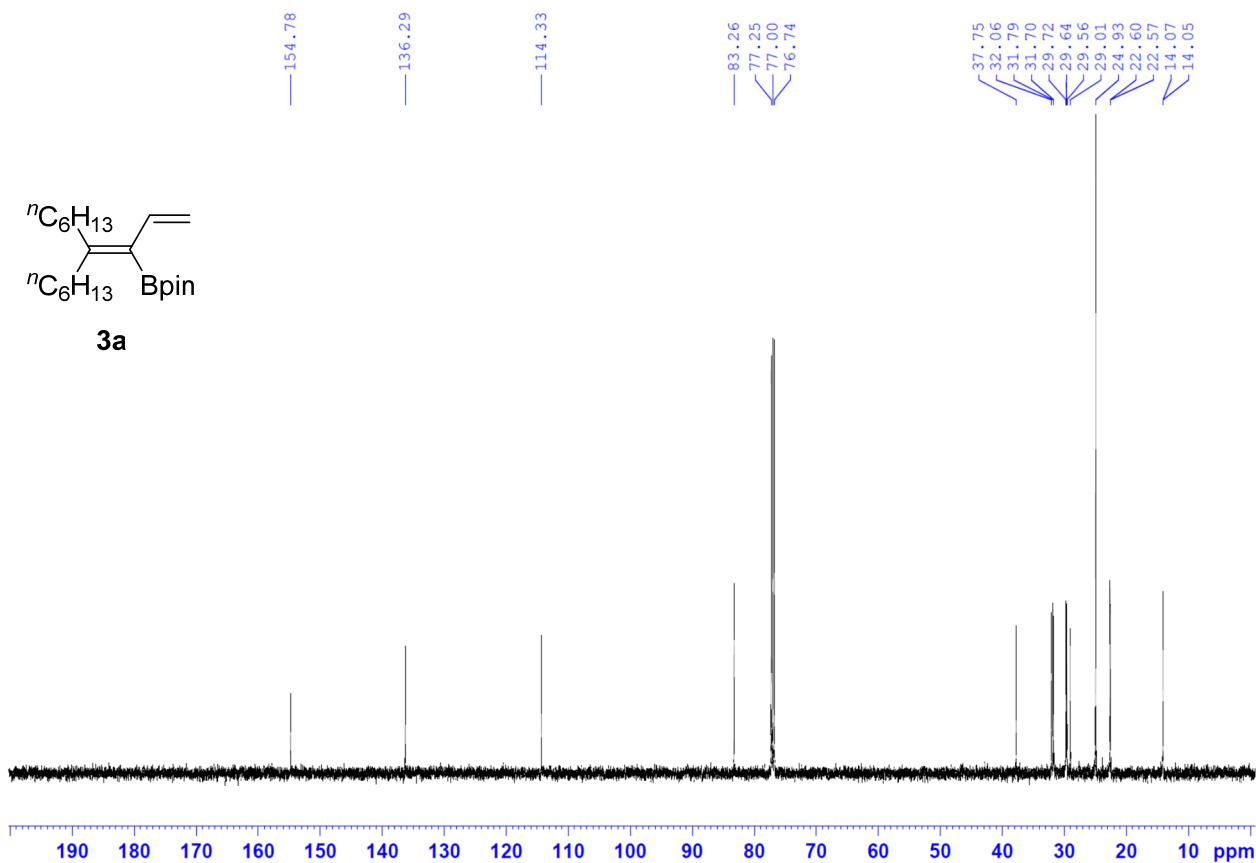

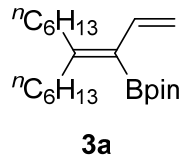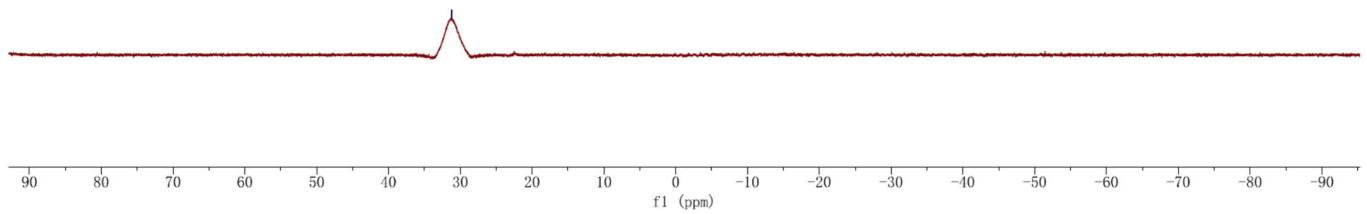

ZWD0103002-2

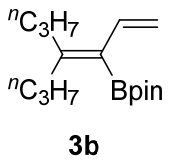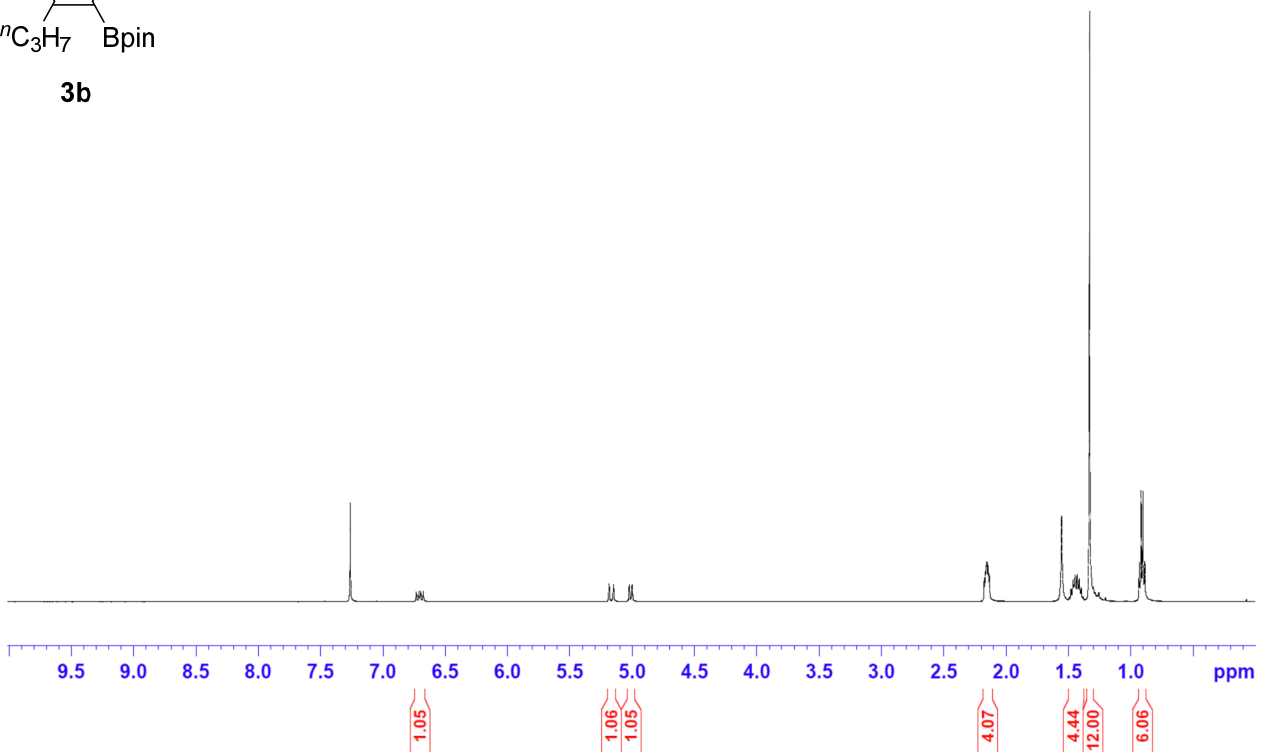

ZWD0103002-C

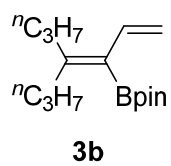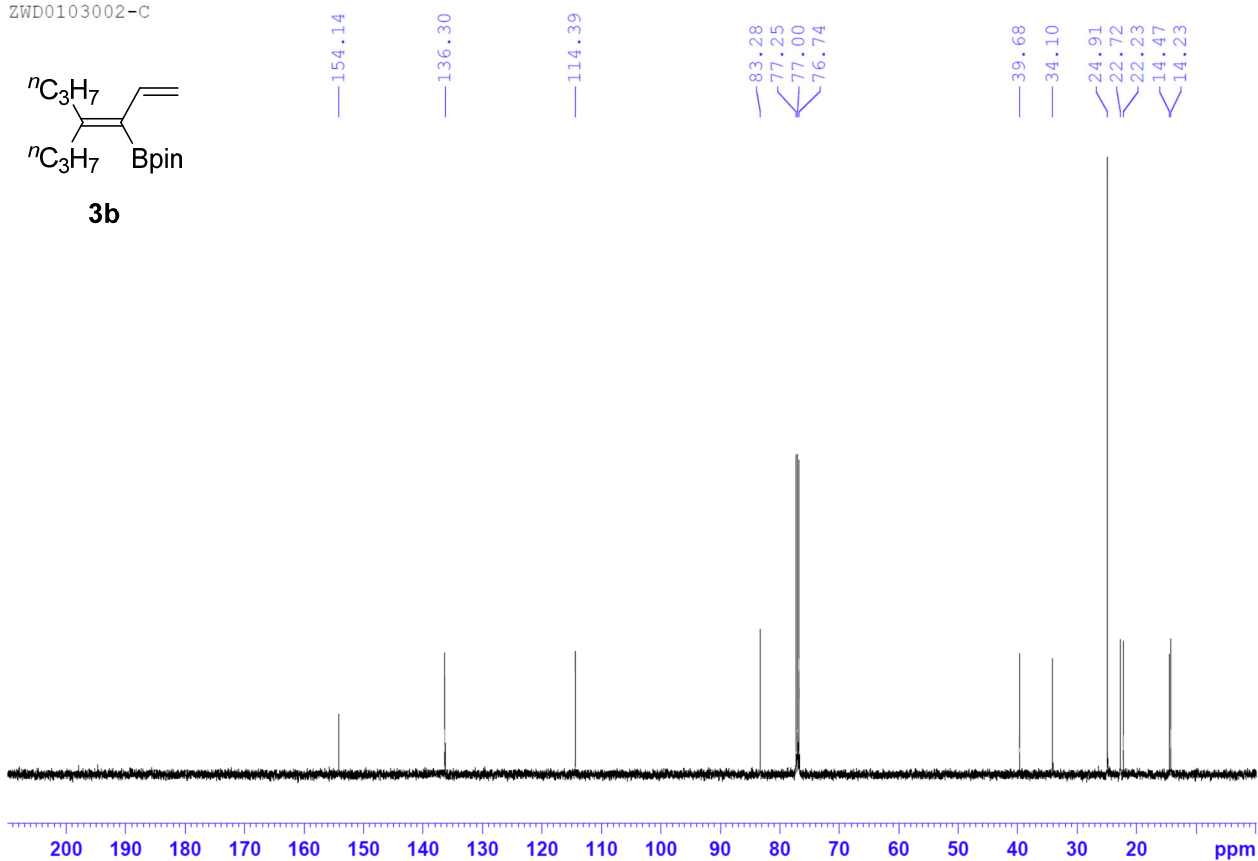

Nov20-2021-ZWD-103-B. 1. fid

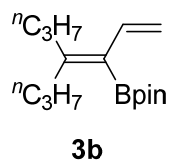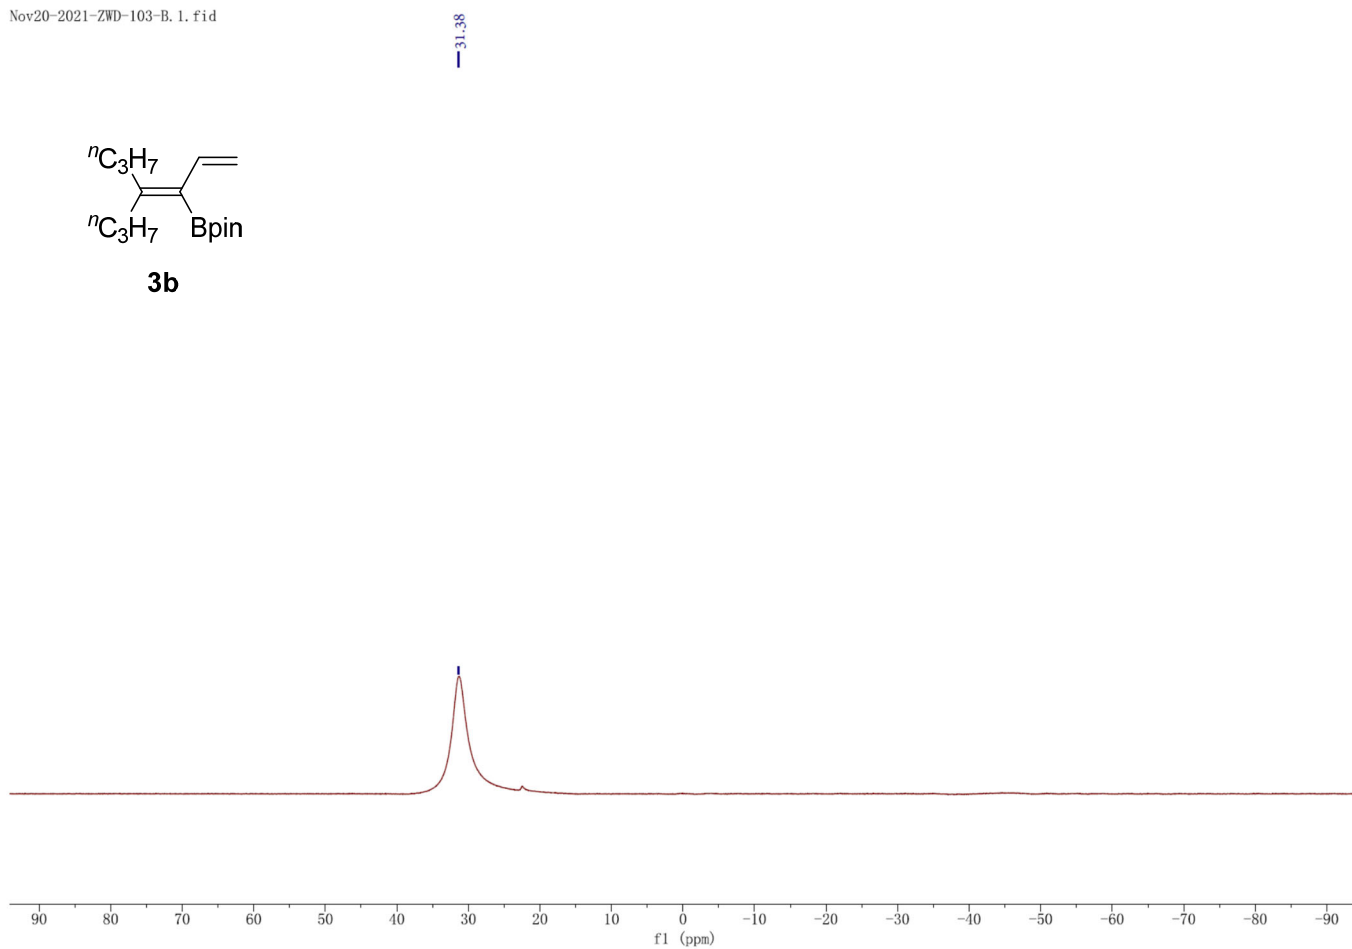

ZWD0133001CLM

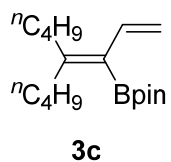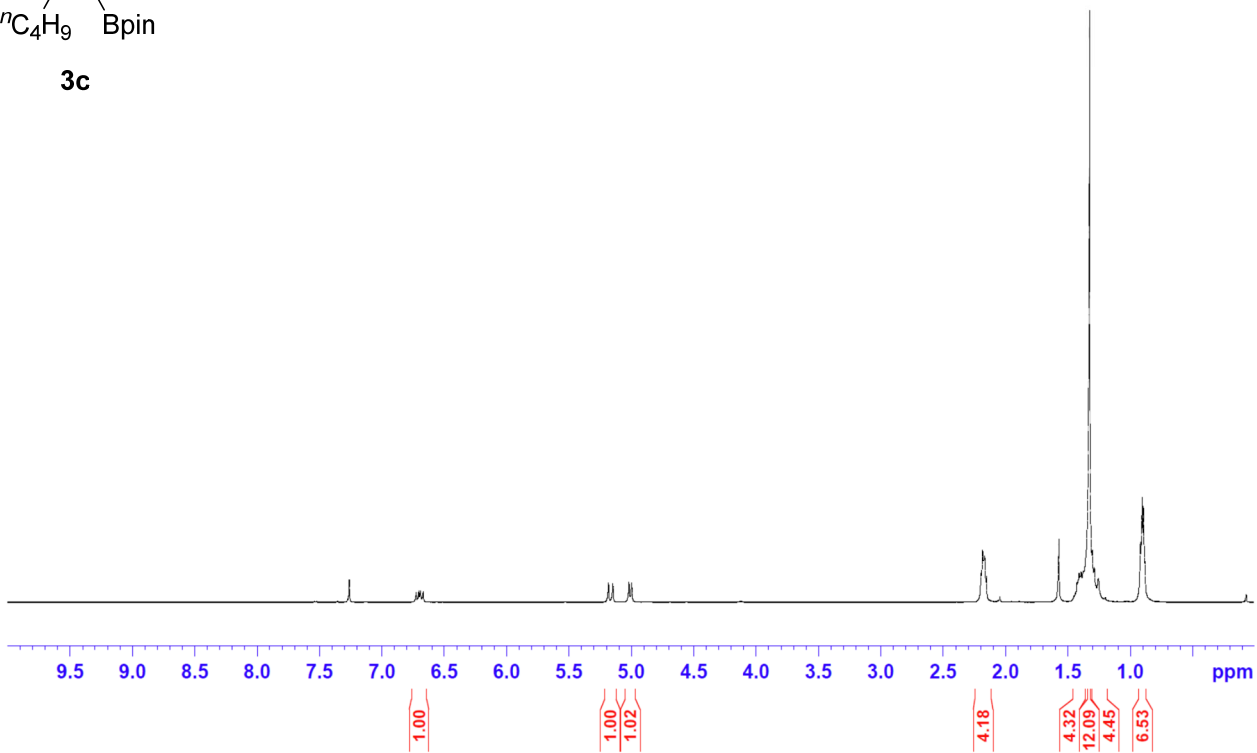

ZWD0133001CLM

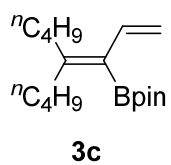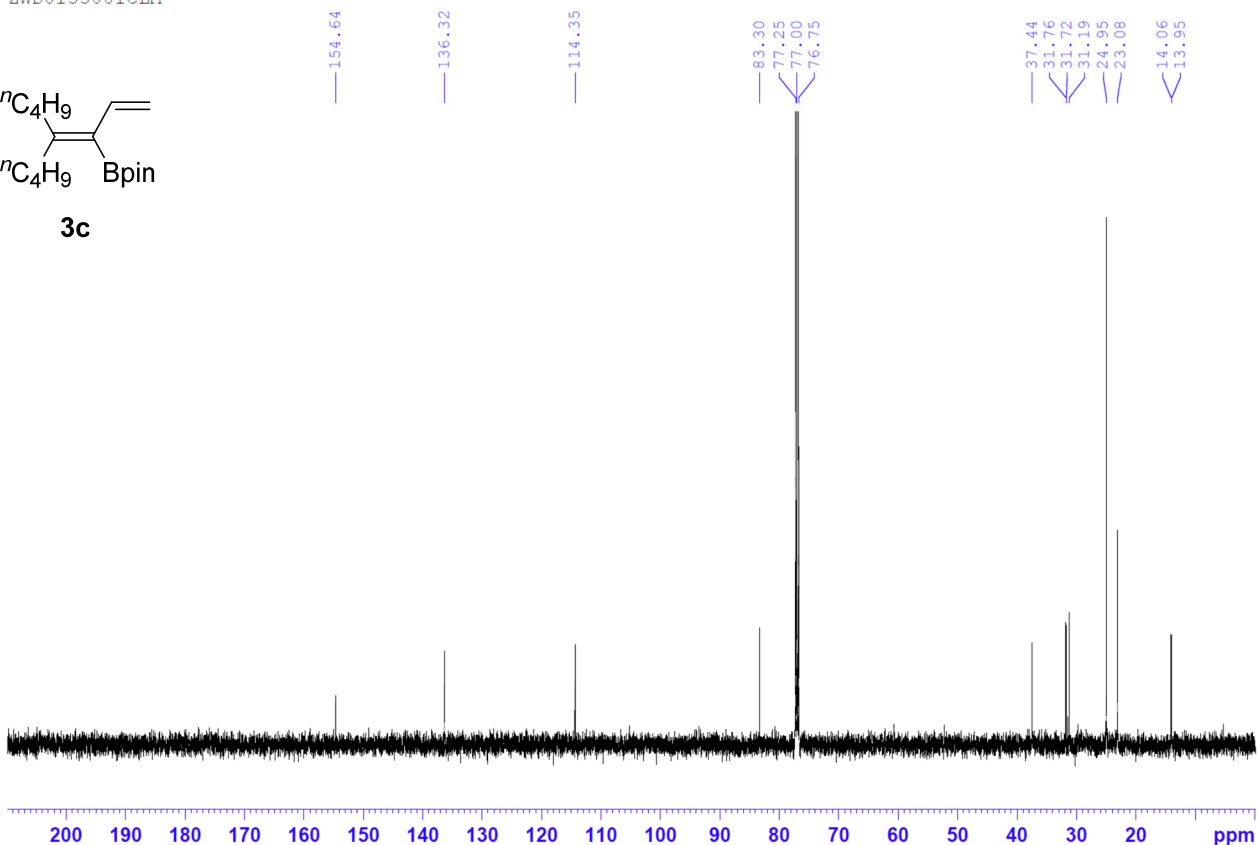

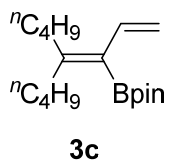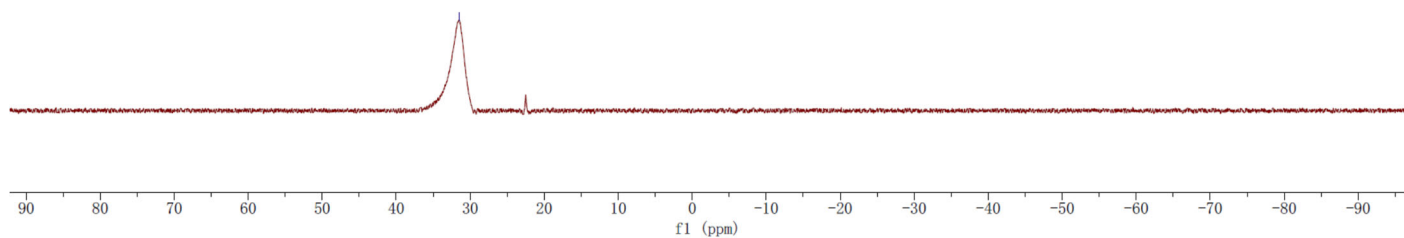

ZJY0016001CLM

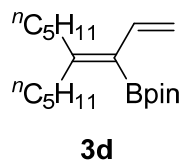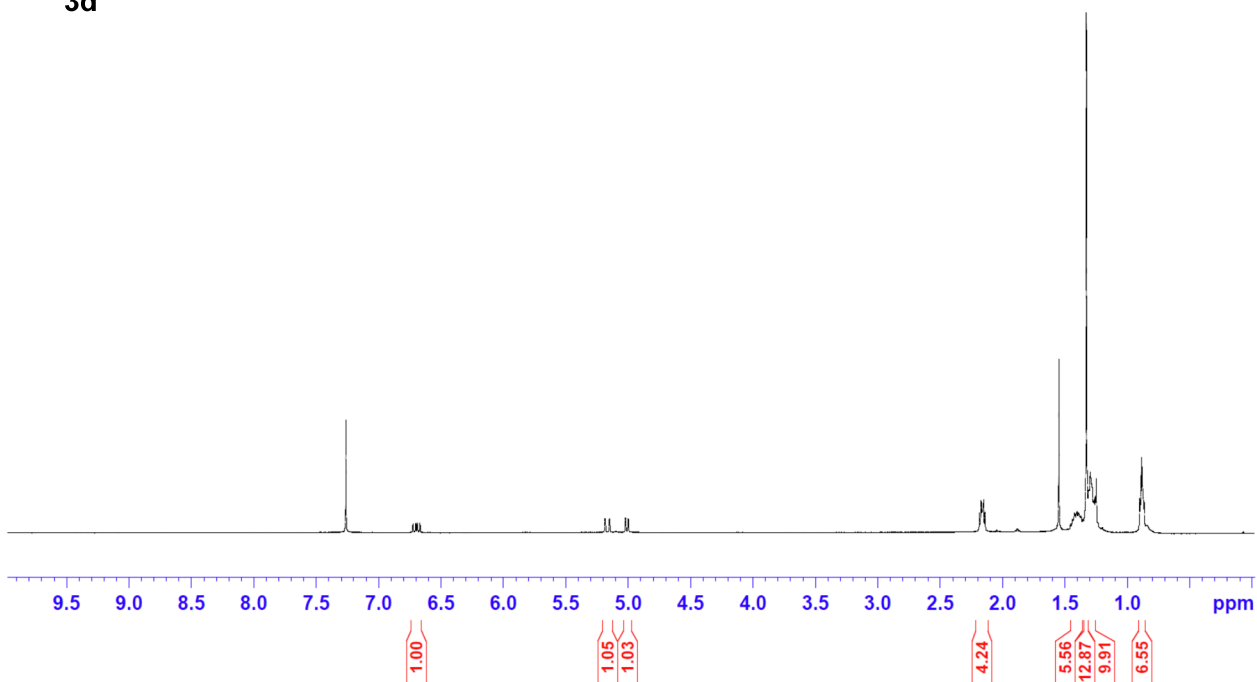

ZJY0016001CLM

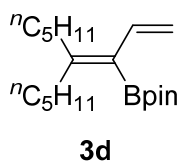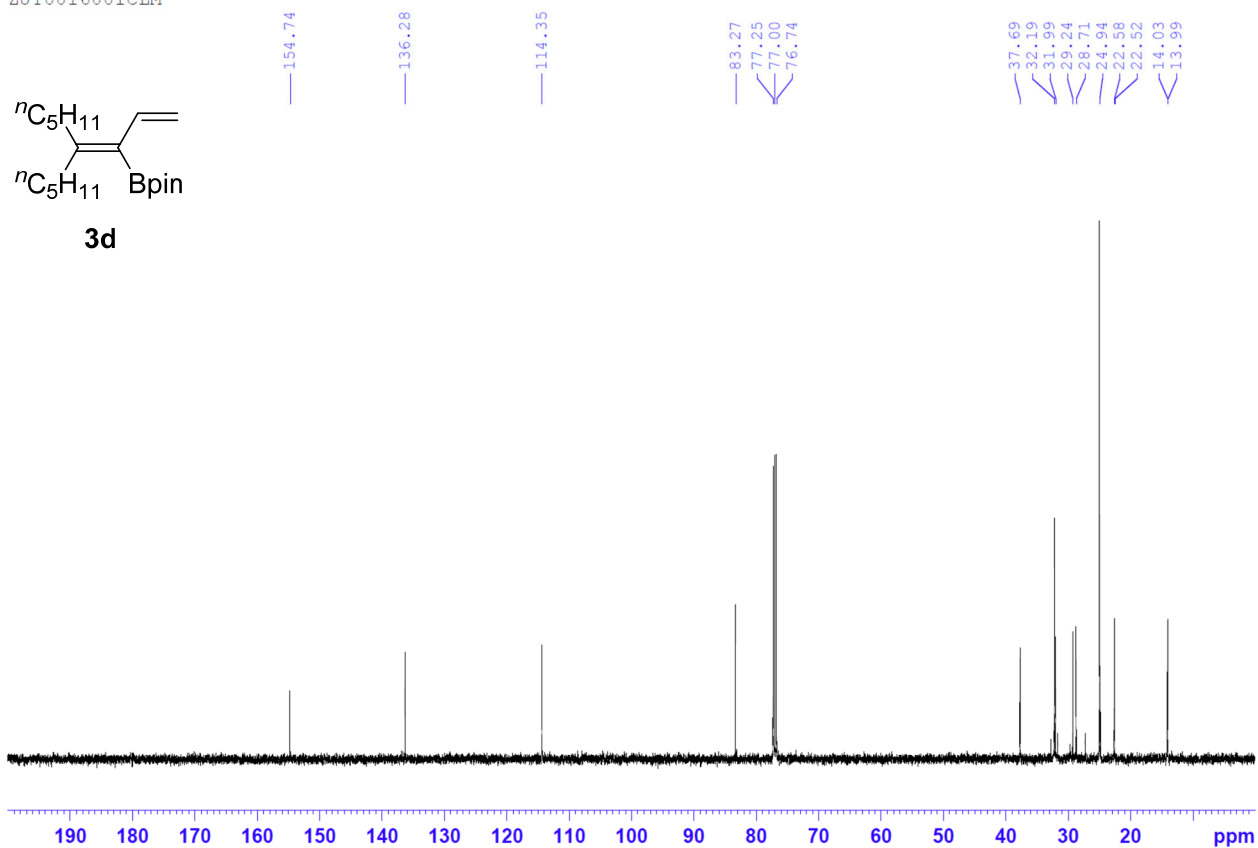

Nov20-2021-ZJY-16-8-B. 1. fid

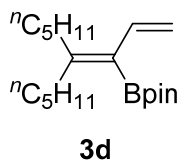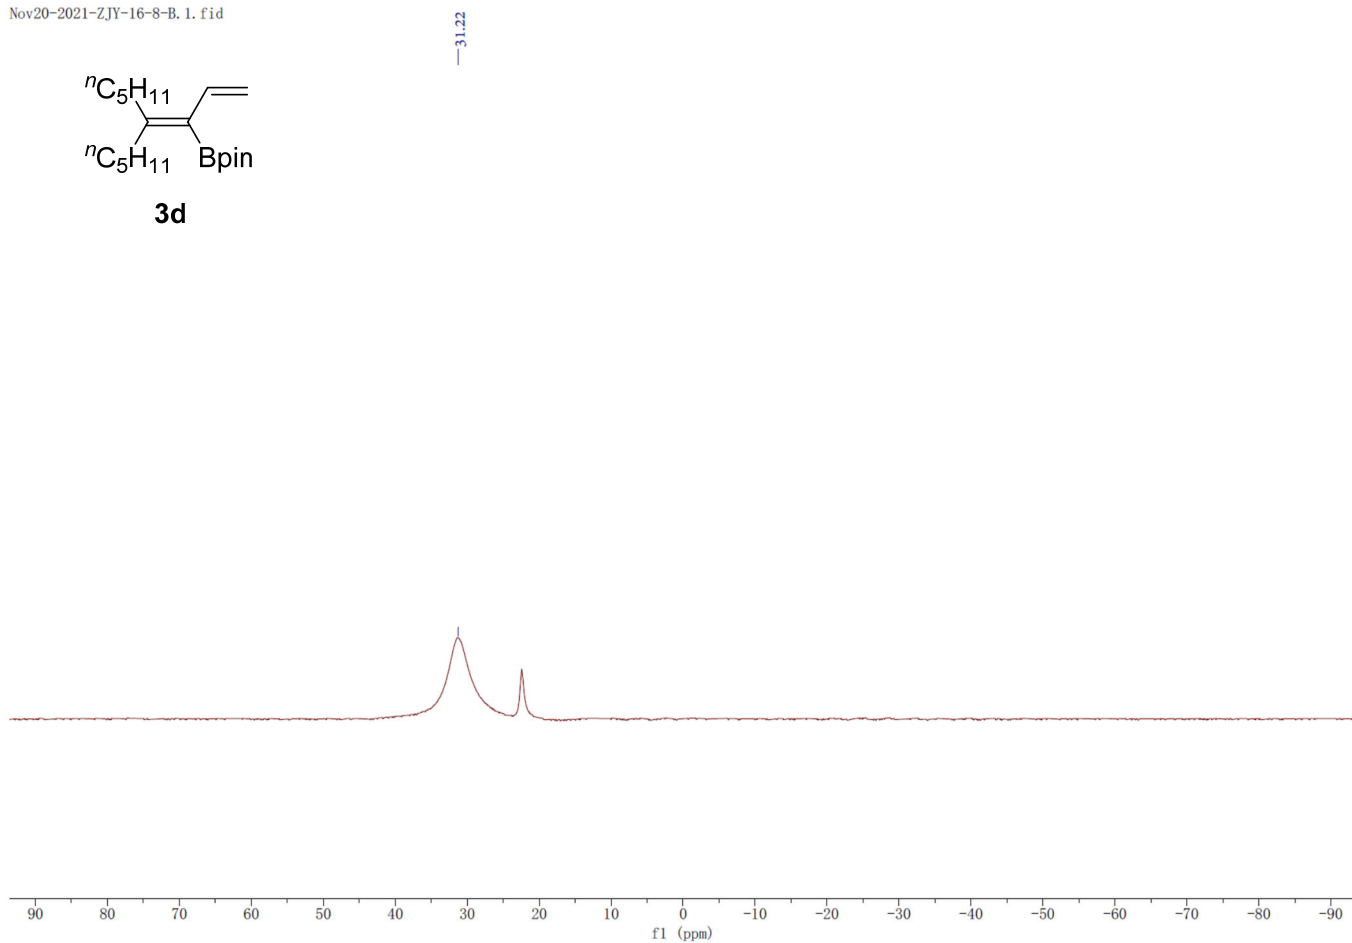



ZWD0098003

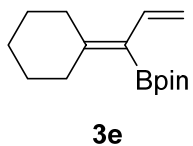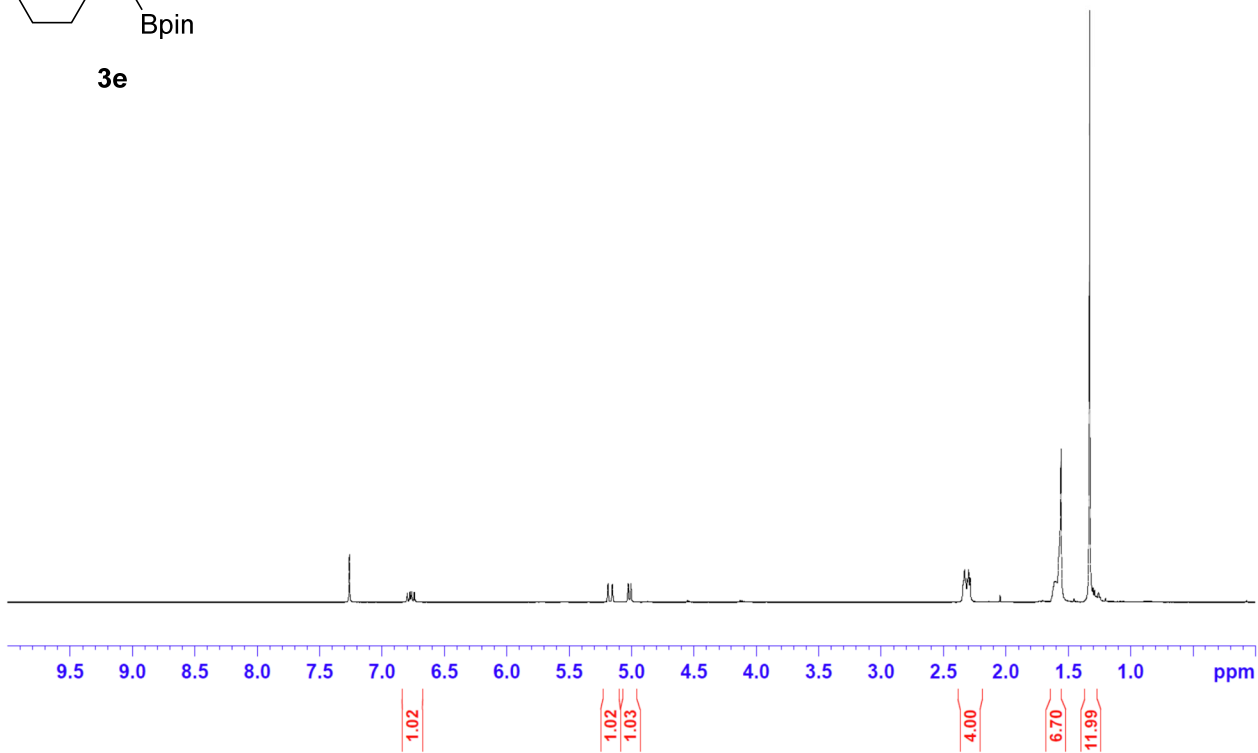

ZWD0098003-C

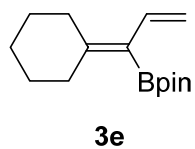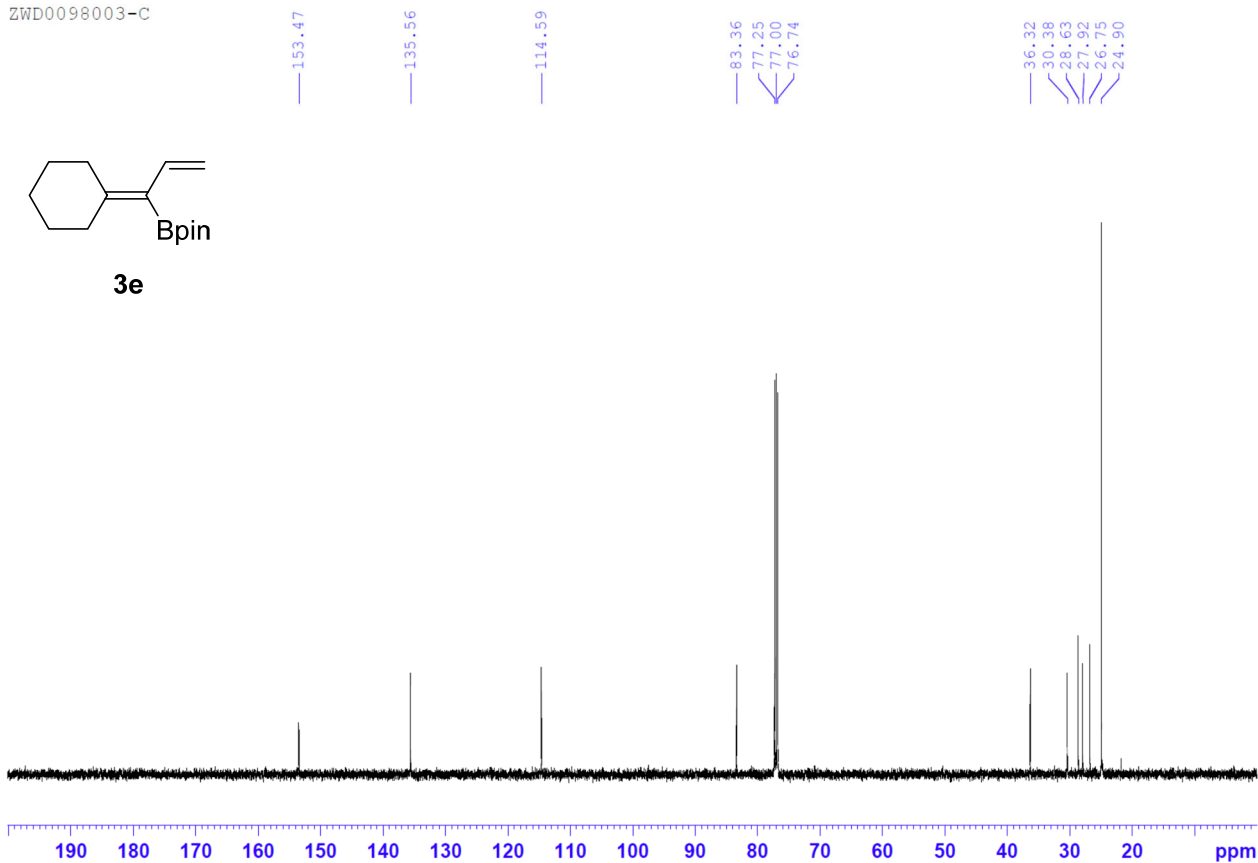

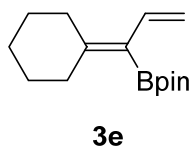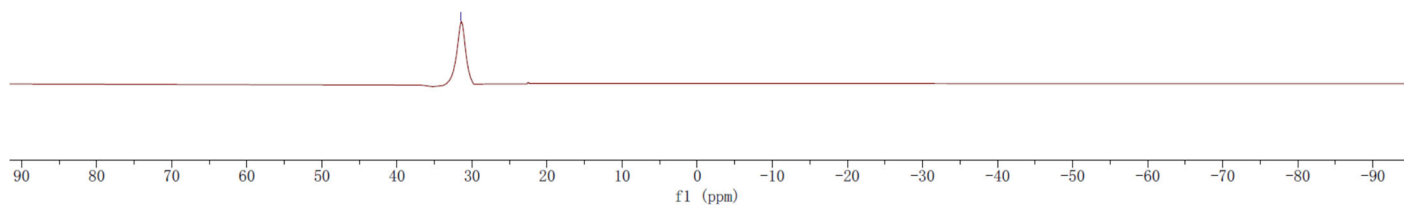

ZWD0129001CLM

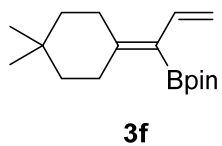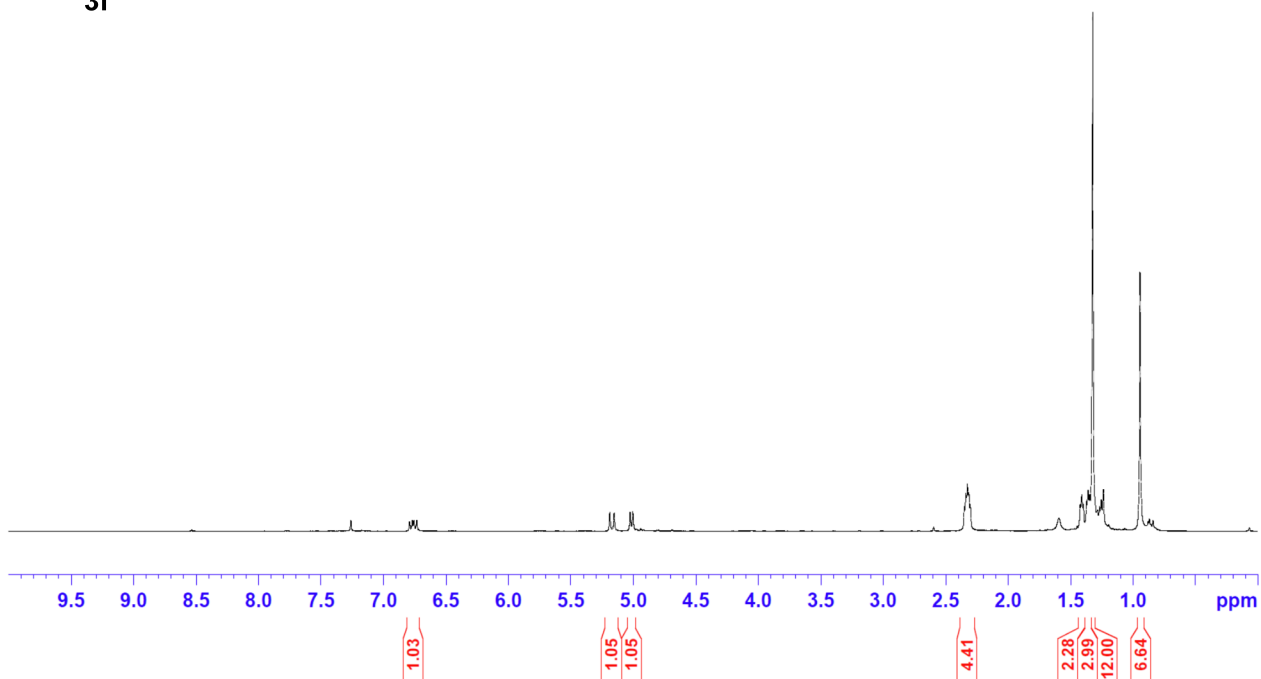

ZWD0129001-C

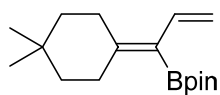

**3f**

153.41

135.59

114.66

83.38

77.25

77.00

76.74

40.95

40.24

31.99

30.41

28.13

26.13

24.91

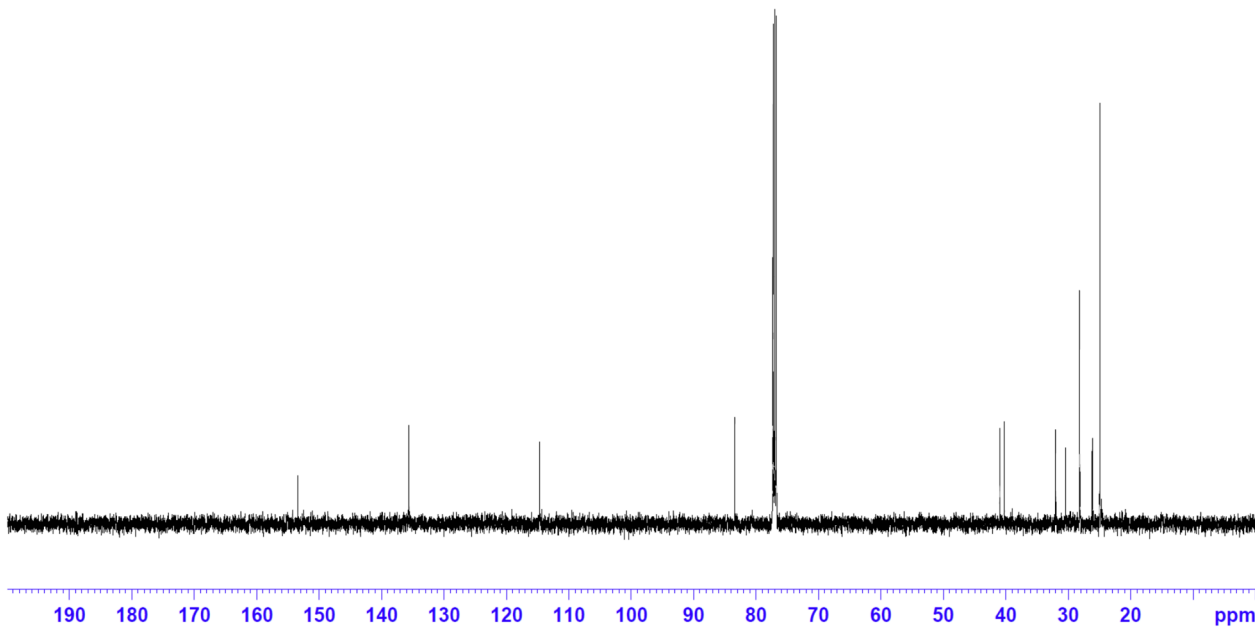

Nov20-2021-ZWD-129-B. 1. fid

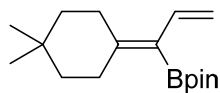

**3f**

31.59

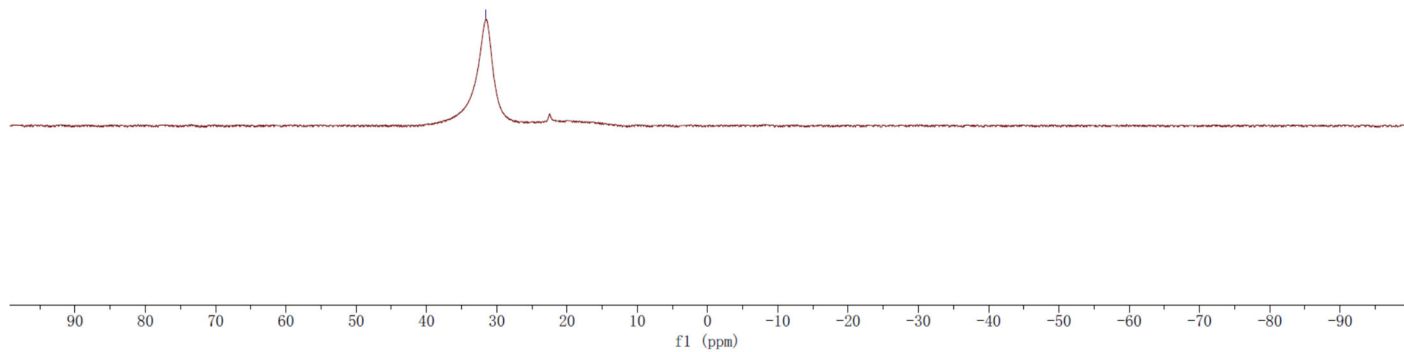

ZWD0114002-2

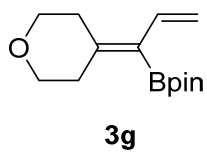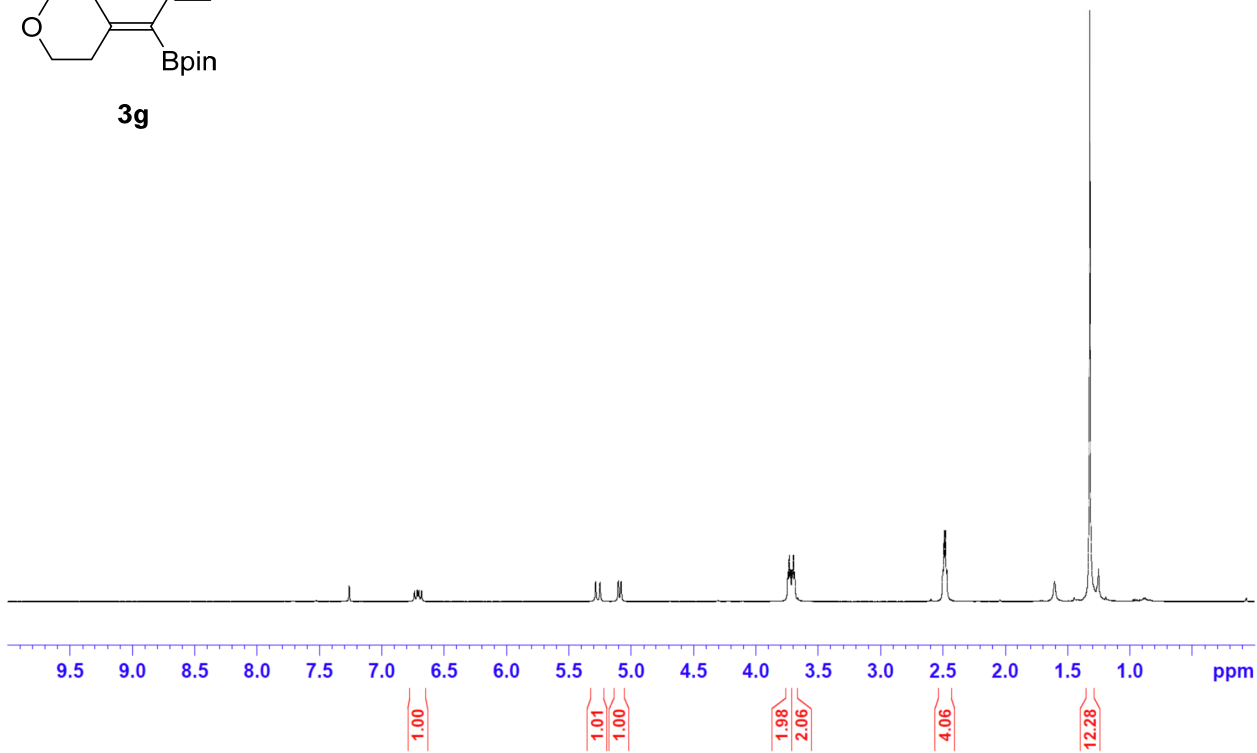

ZWD0114002-C

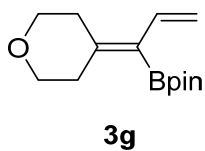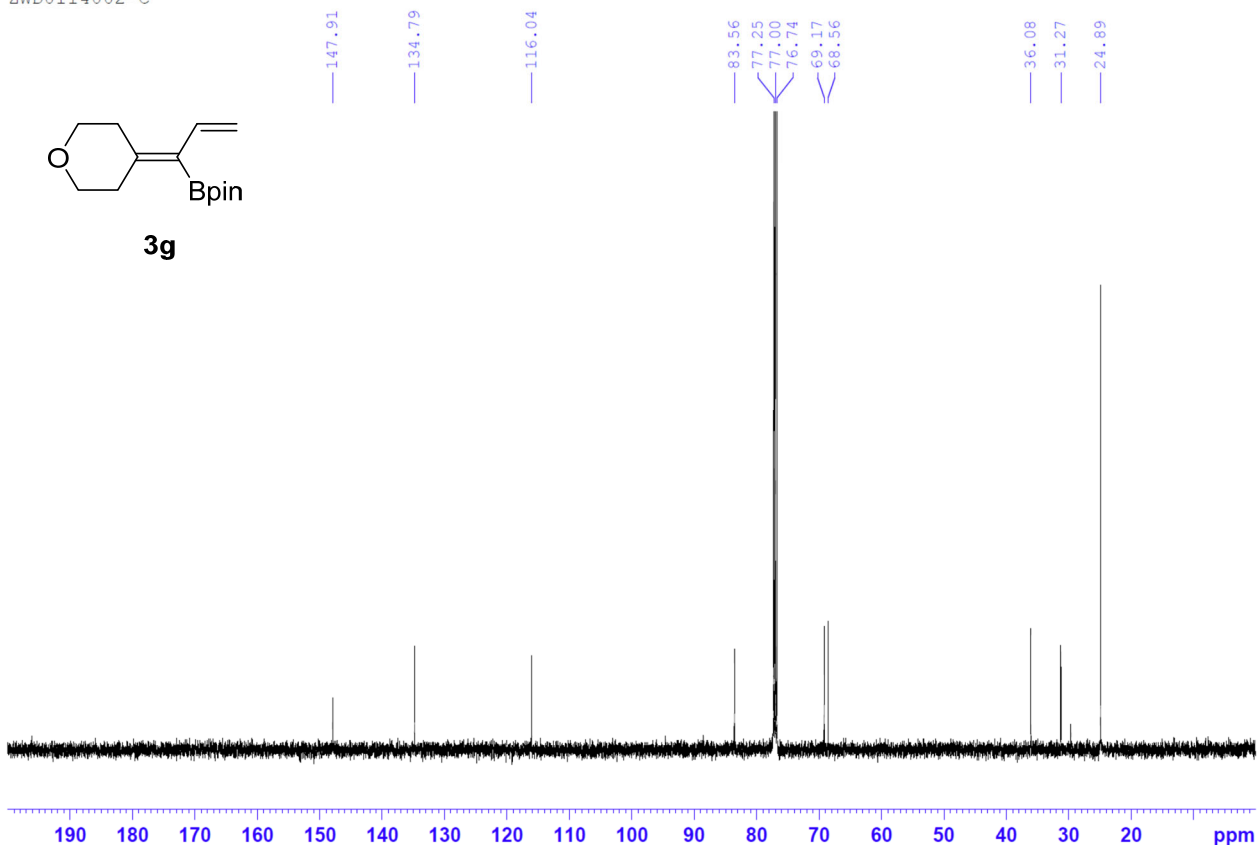

3.1.15

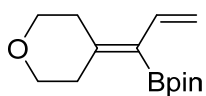

**3g**

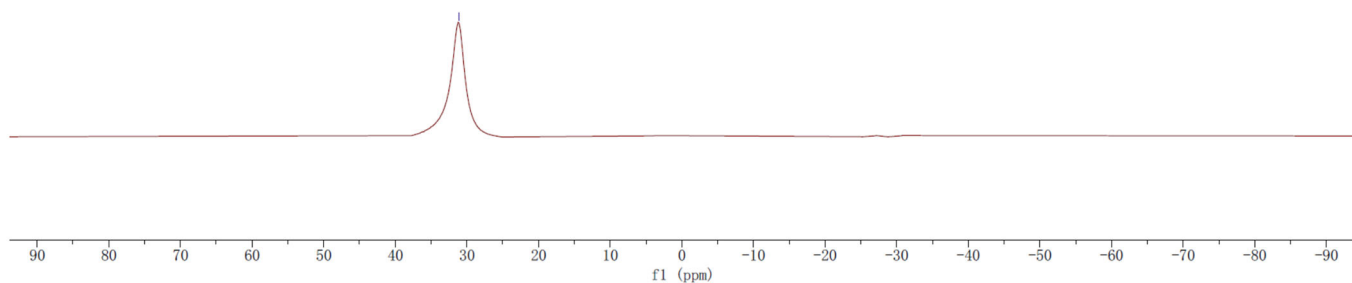

ZWD0104001CLM

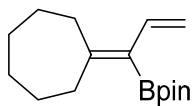

**3h**

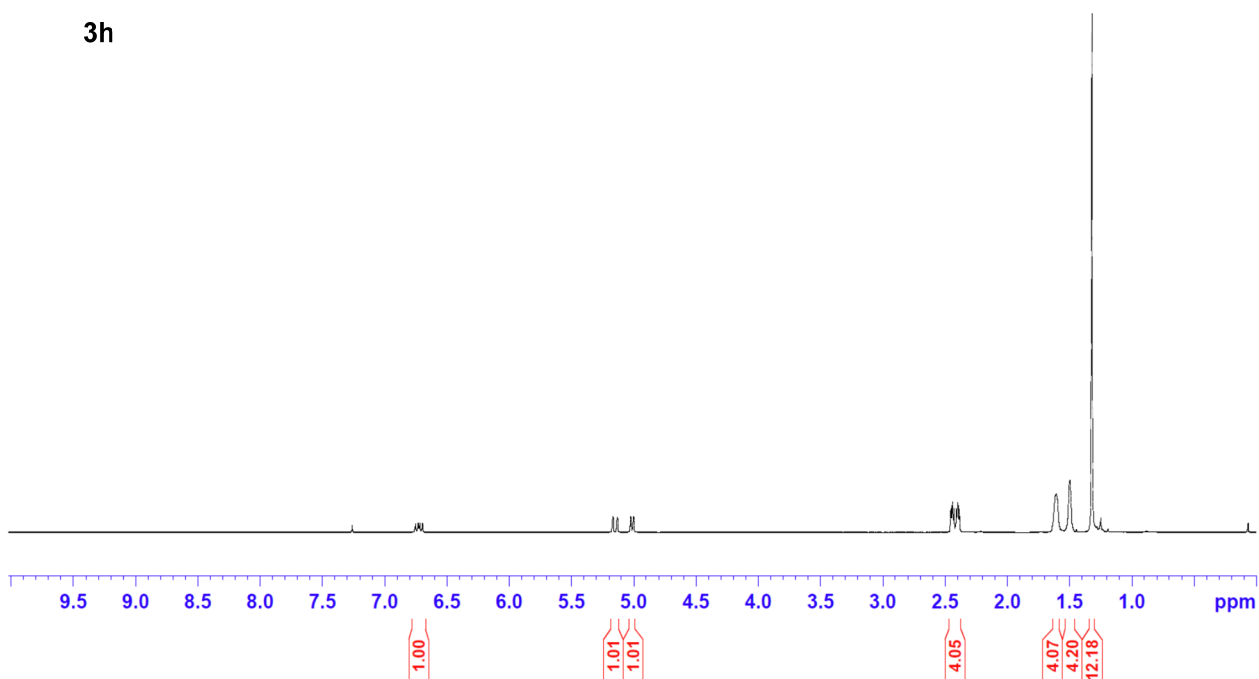

ZWD0104001CLM

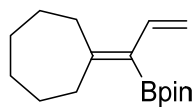

3h

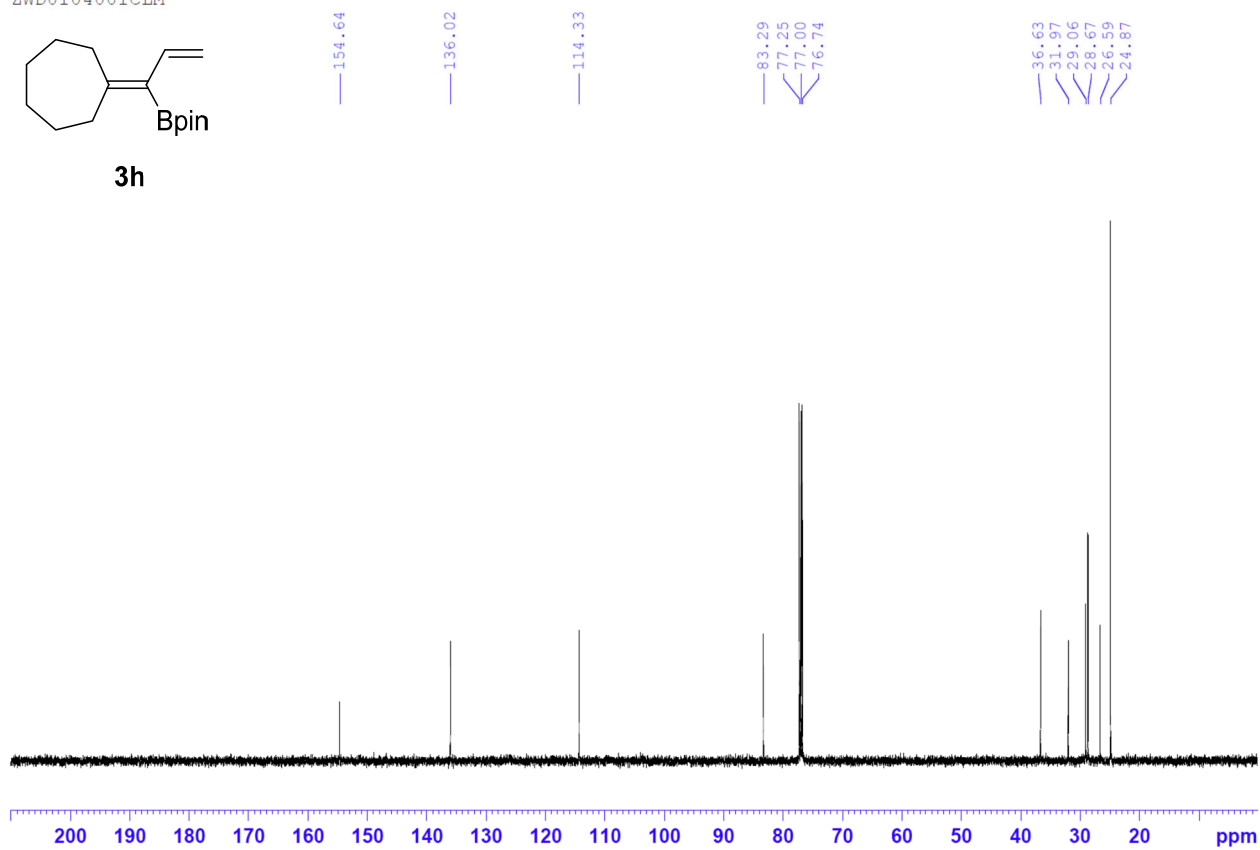

Nov20-2021-ZWD-104-B. 1. f1d

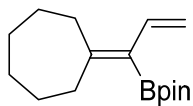

3h

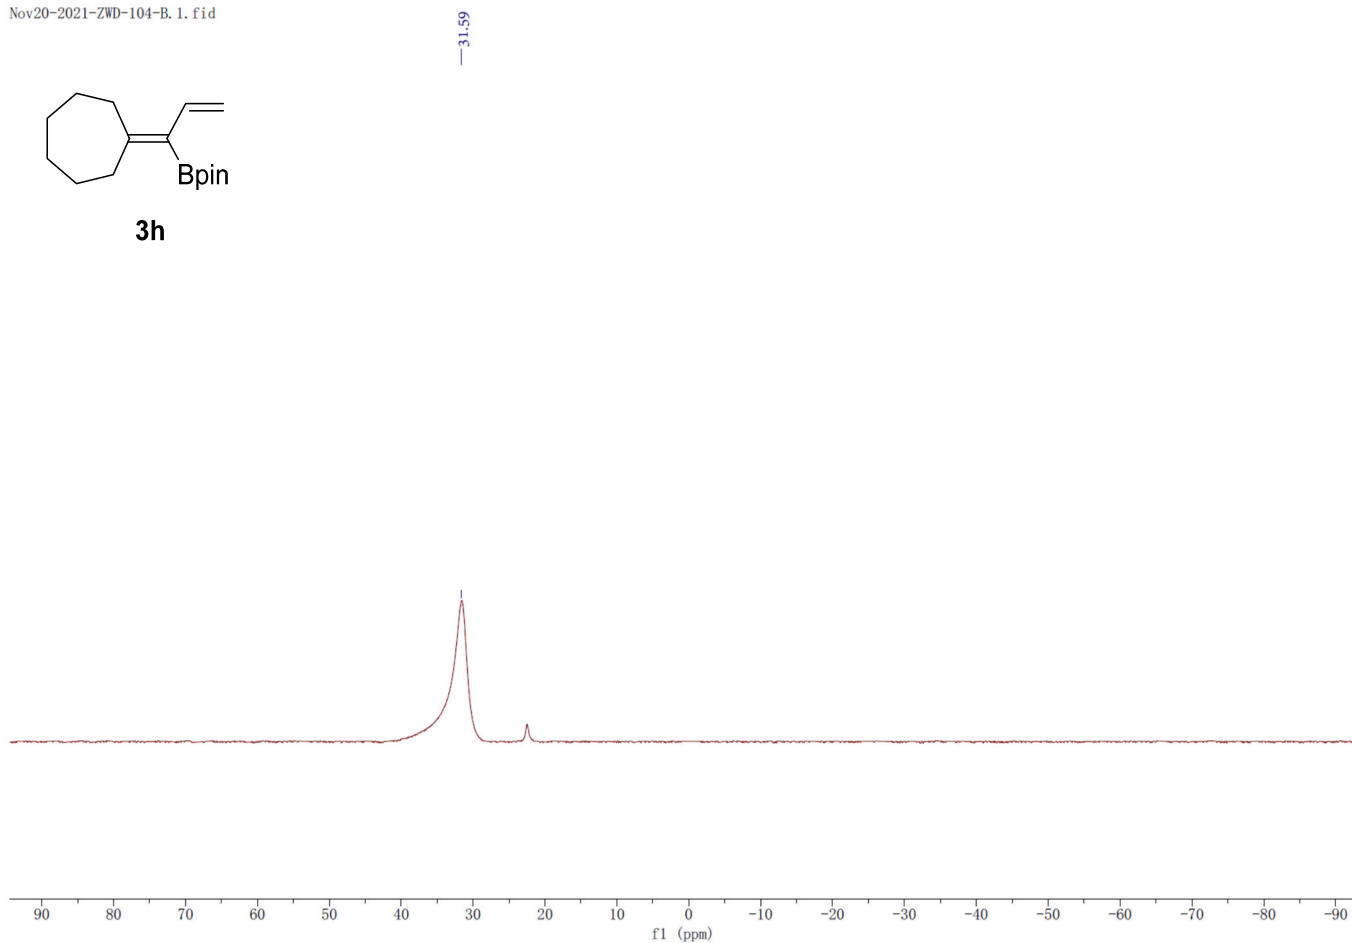

ZWD0097003-2CLM

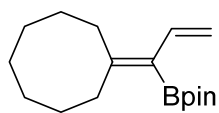

**3i**

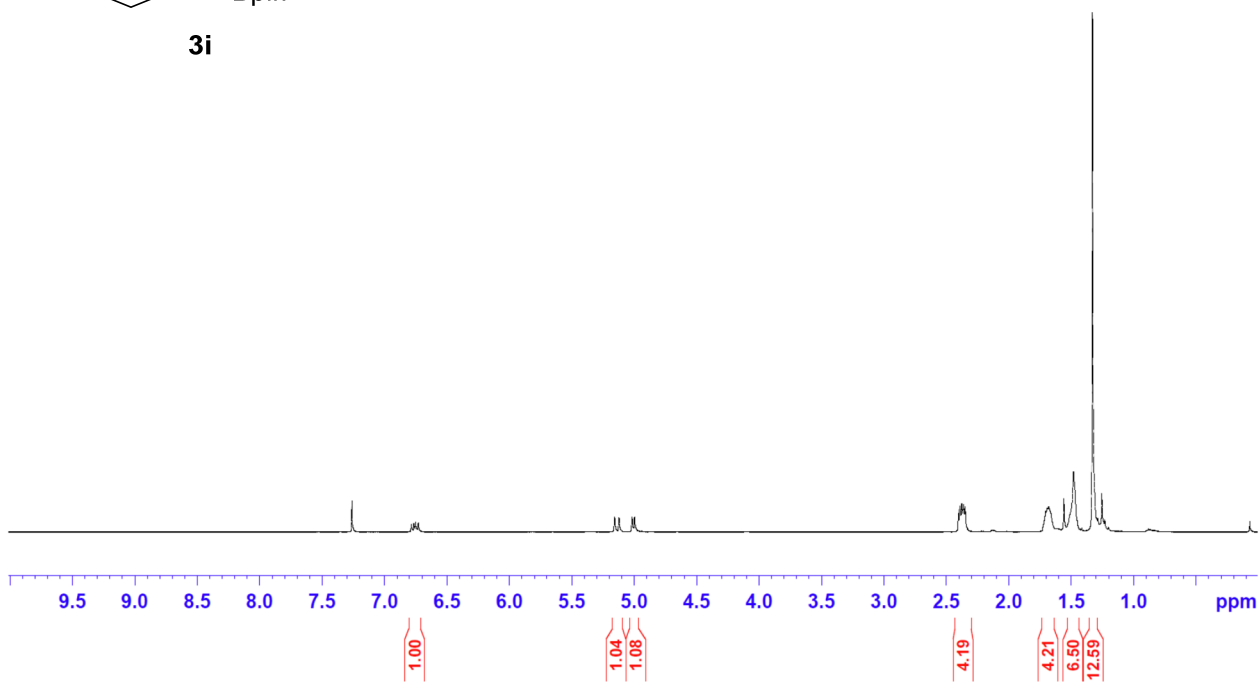

ZWD0097001-C

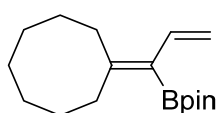

**3i**

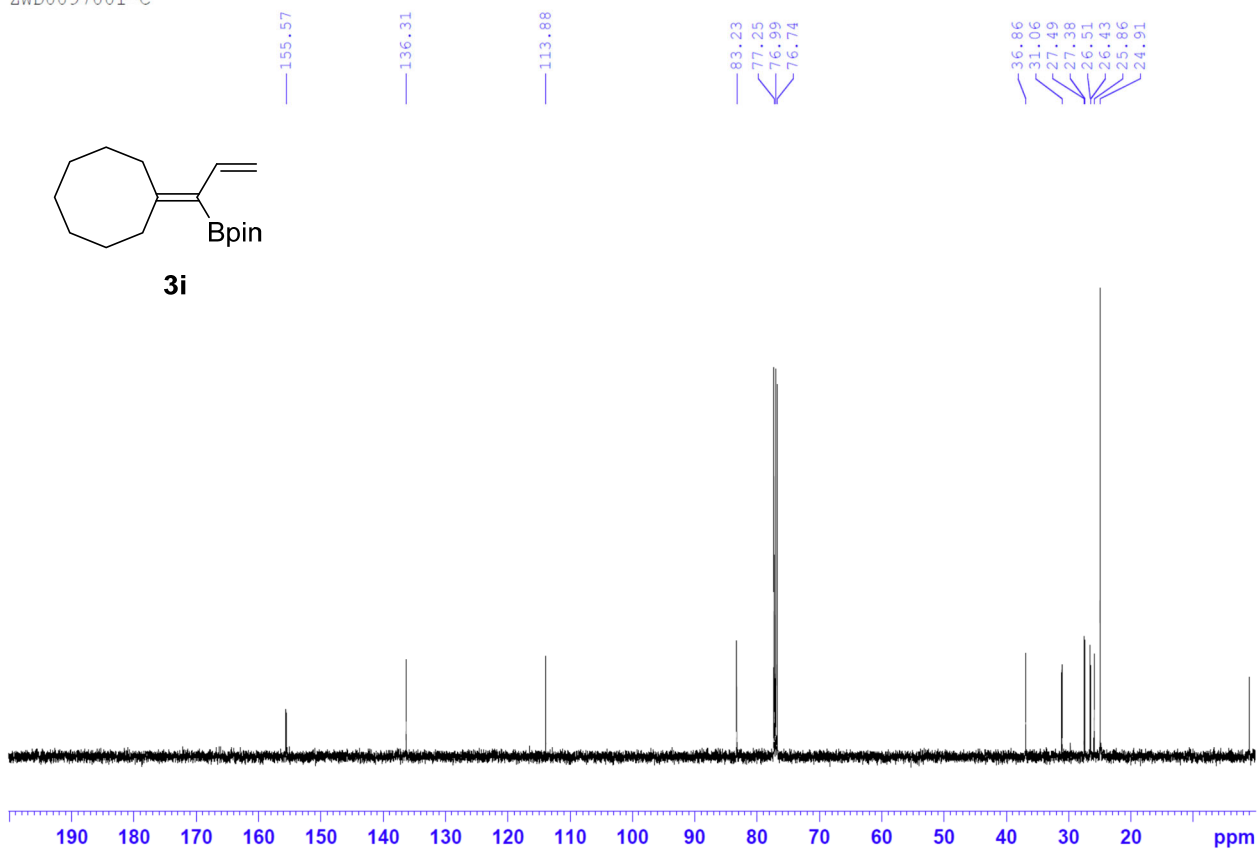

31.52

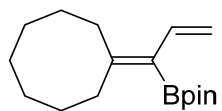

3i

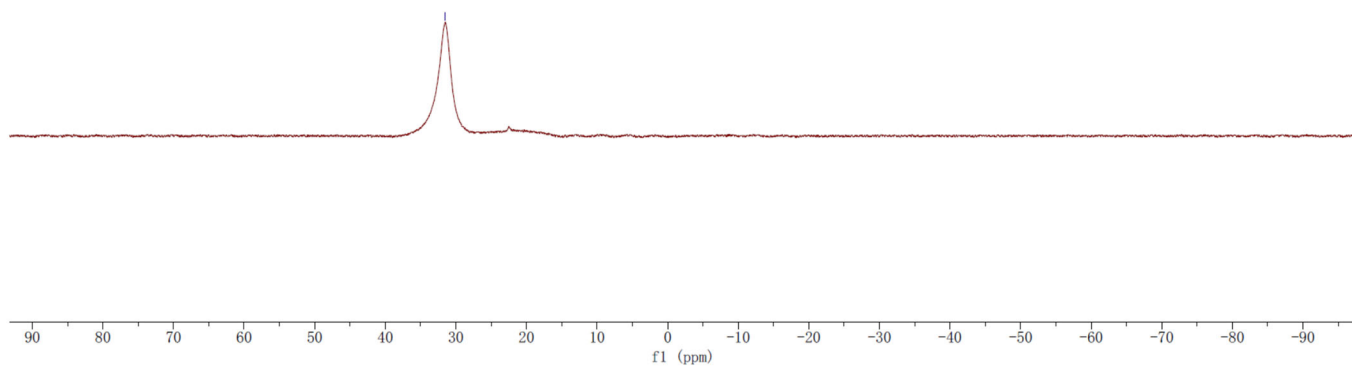

ZWD0113002-2

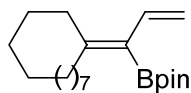

3j

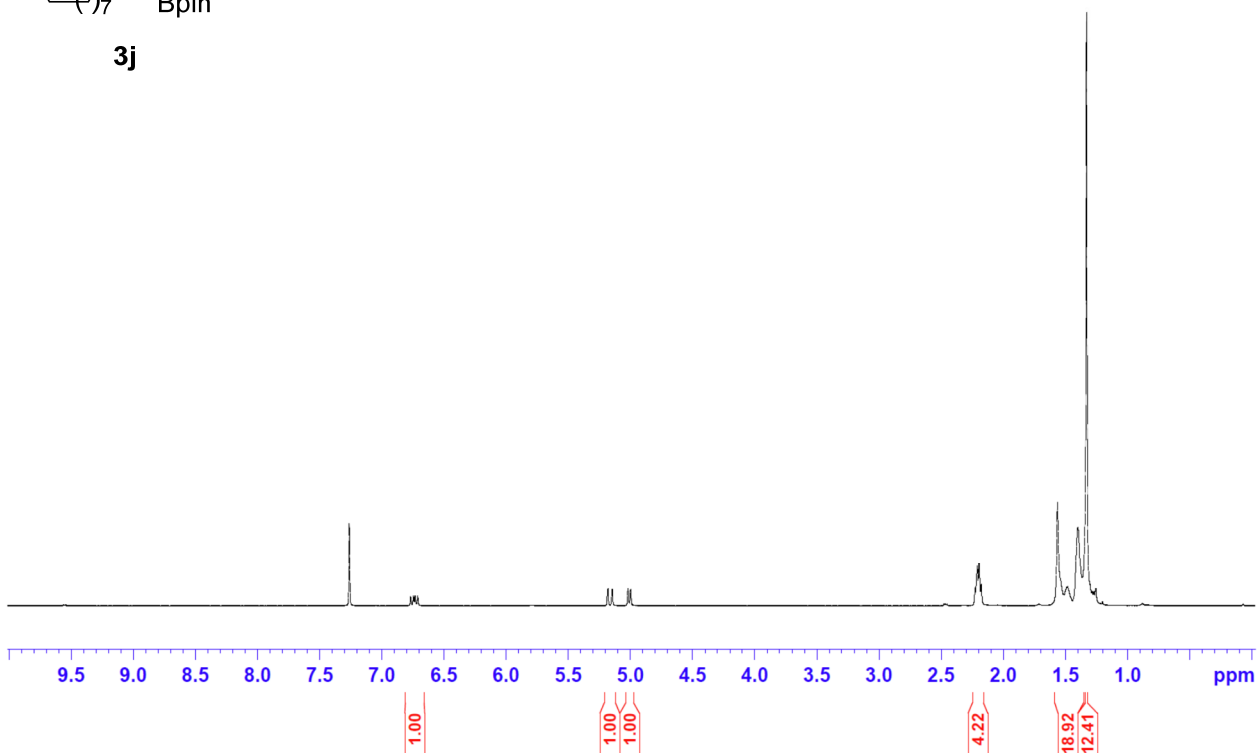



ZWD0113001-C

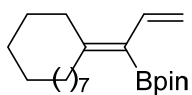

154.22

136.30

114.49

83.36

77.25

77.00

76.75

33.13

27.15

26.08

26.00

25.91

24.89

24.54

24.04

22.92

22.83

22.09

22.00

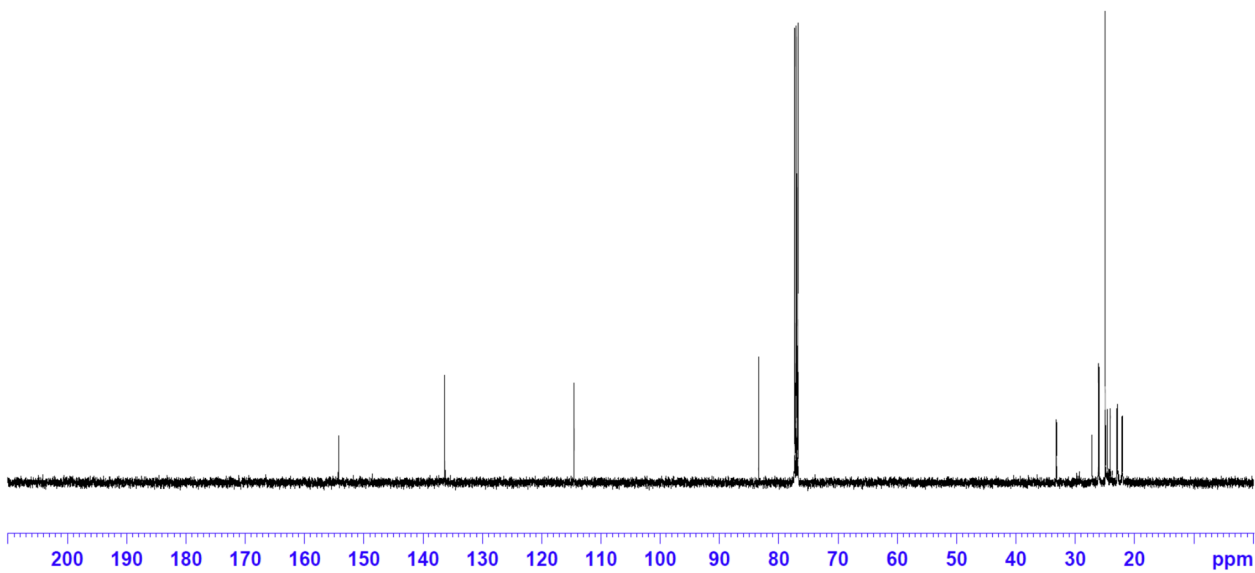

Nov27-2021-ZWD-113-B. 1. f1d

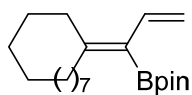

31.22

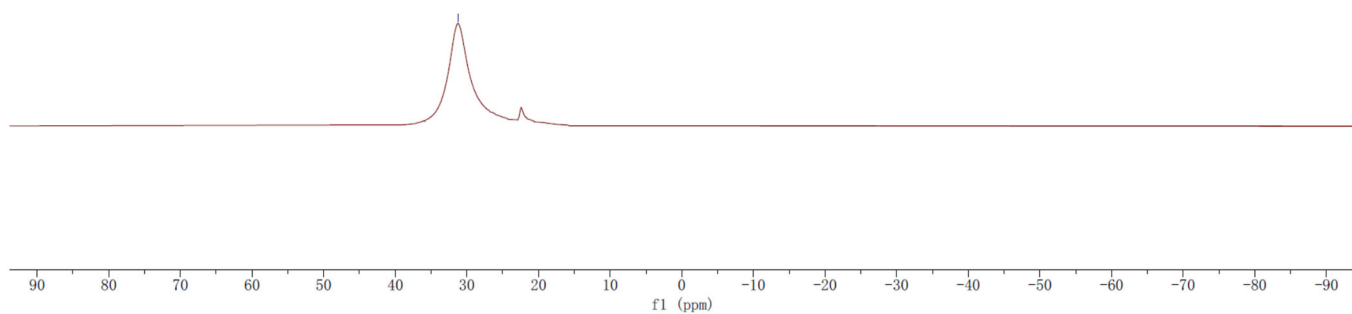

ZWD0134001CLM

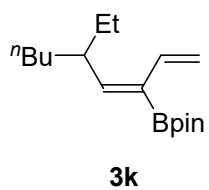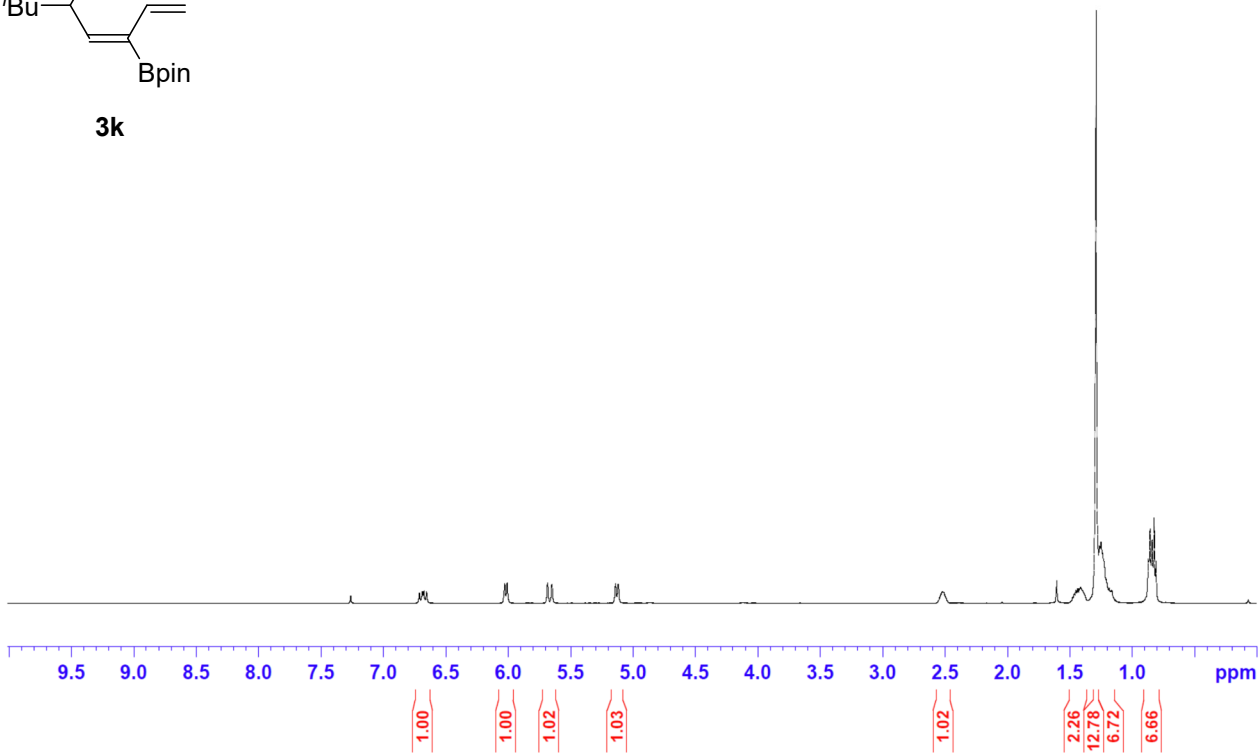

ZWD0134001CLM

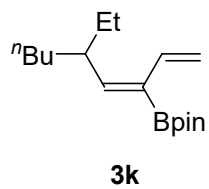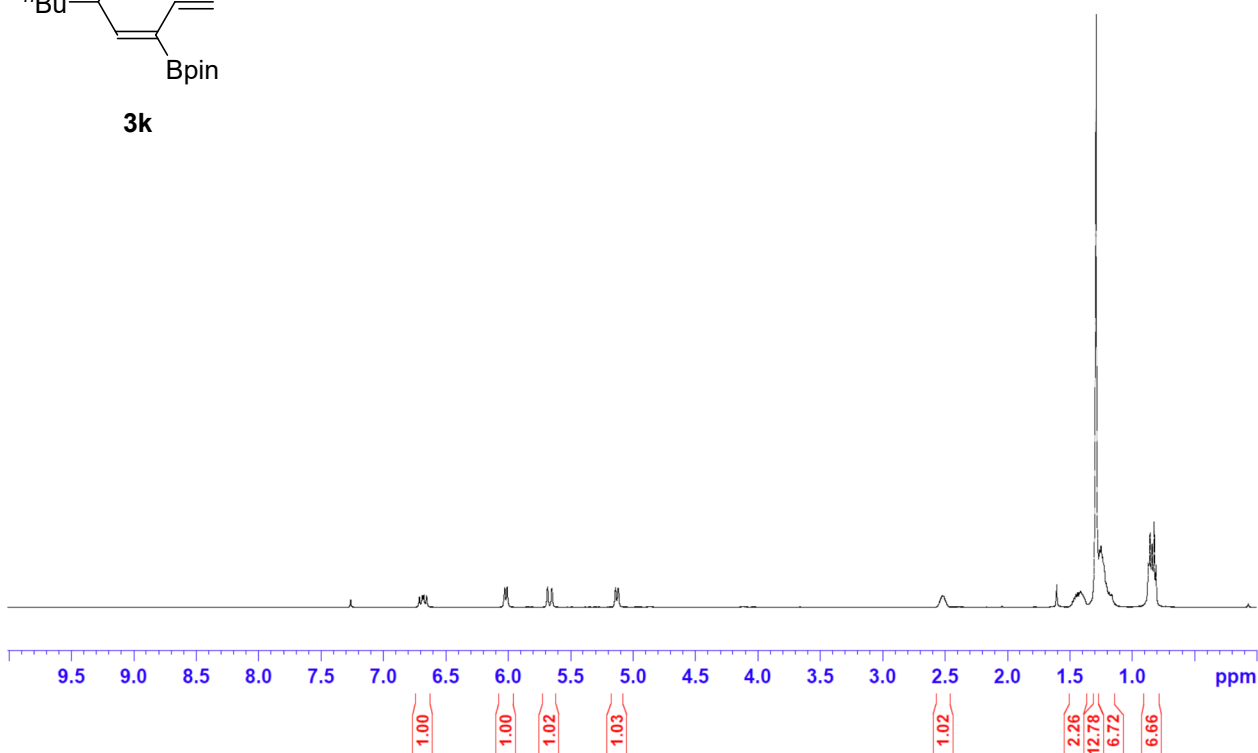

30.38

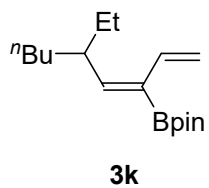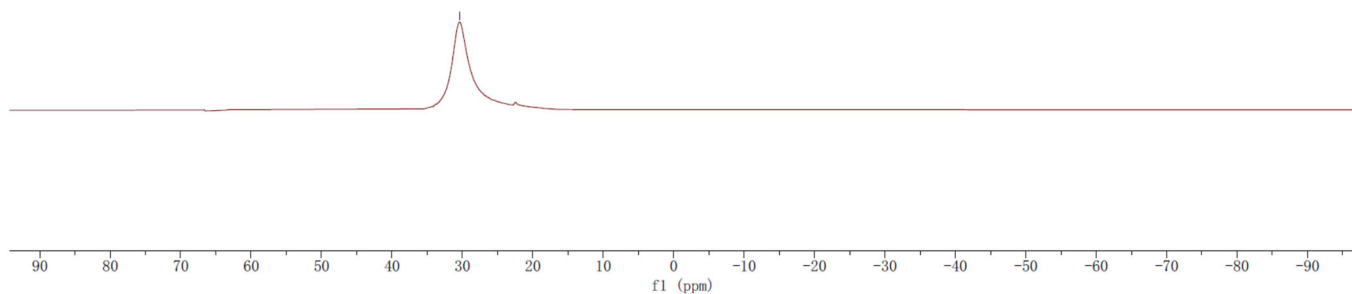

ZWD0160001CLM

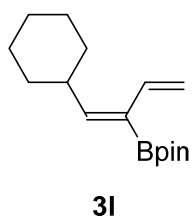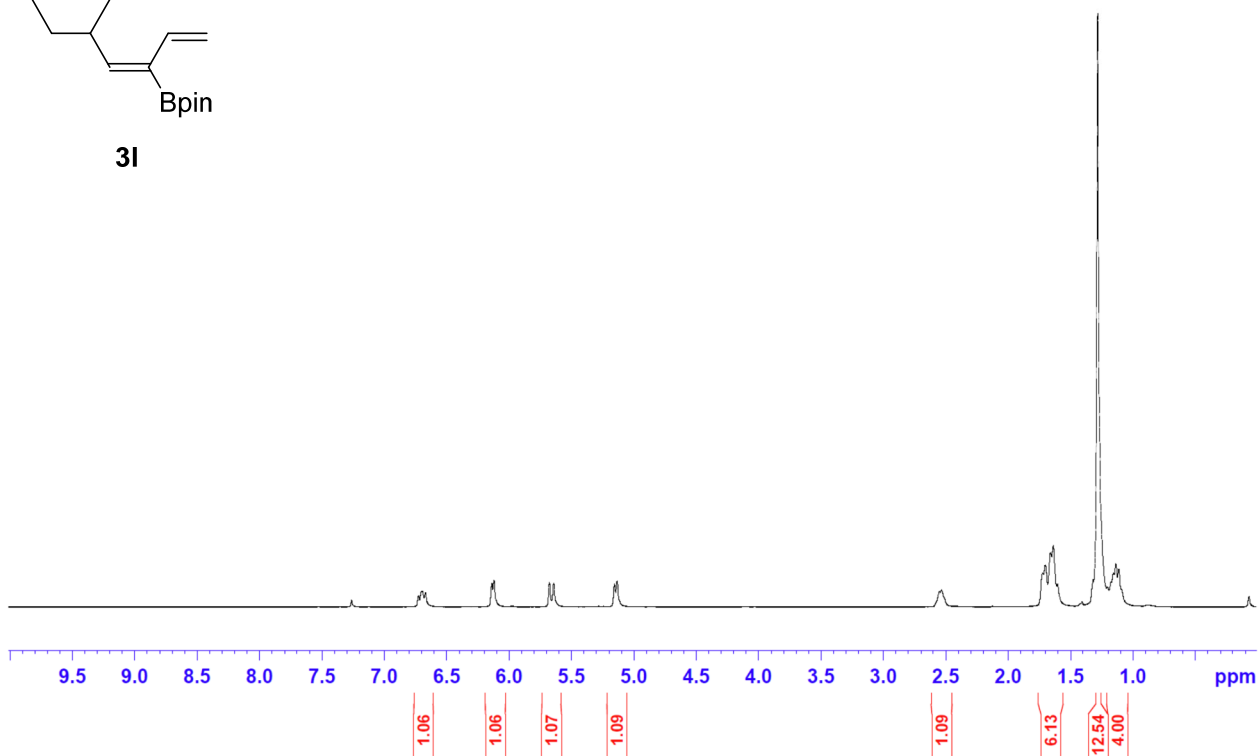

ZWD0160001CLM-C

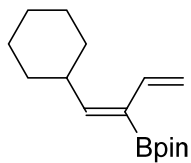

31

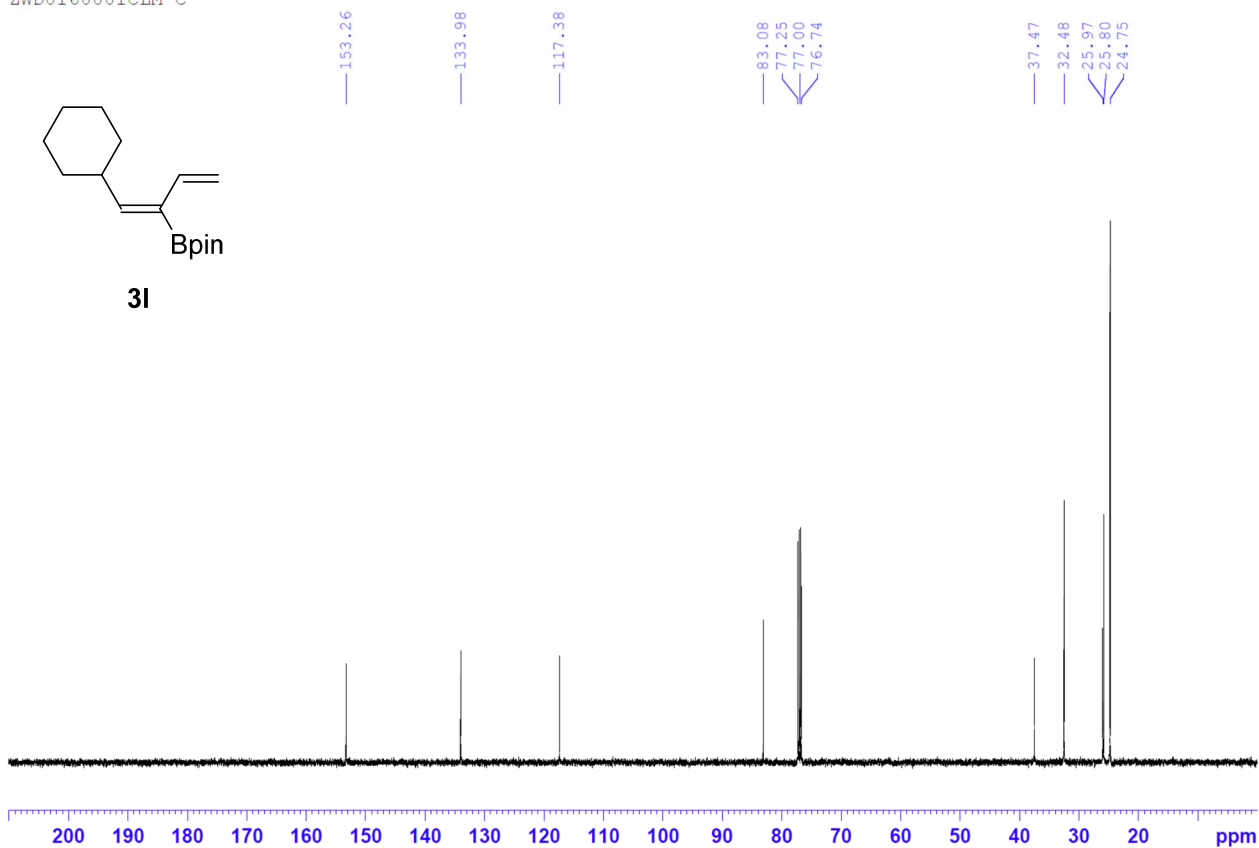

Nov20-2021-ZWD-160-B. 1. f1d

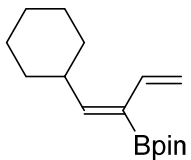

31

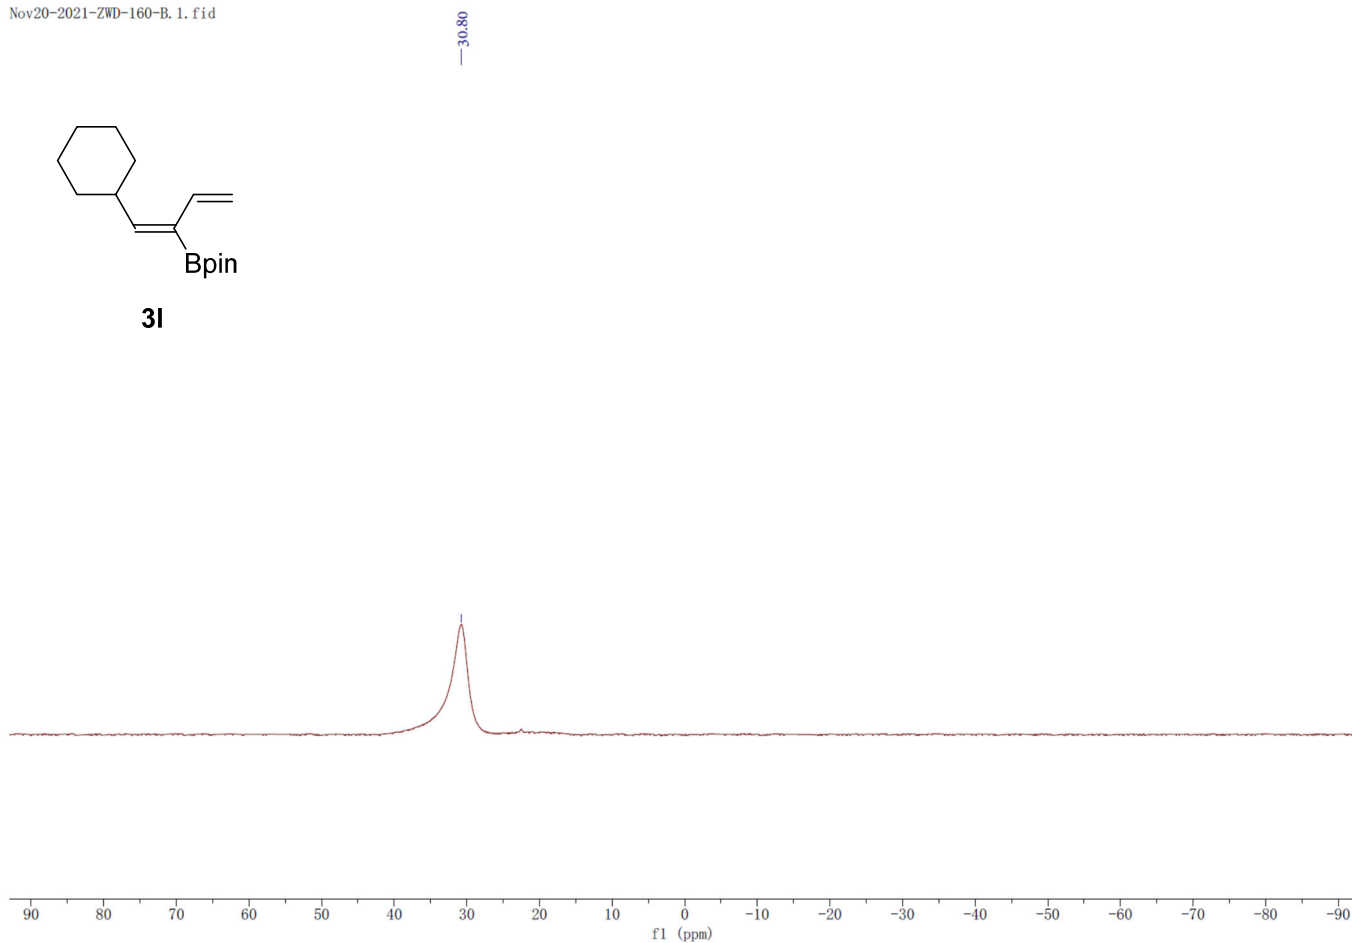

ZWD0107001clm-h

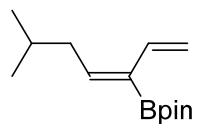

**3m**

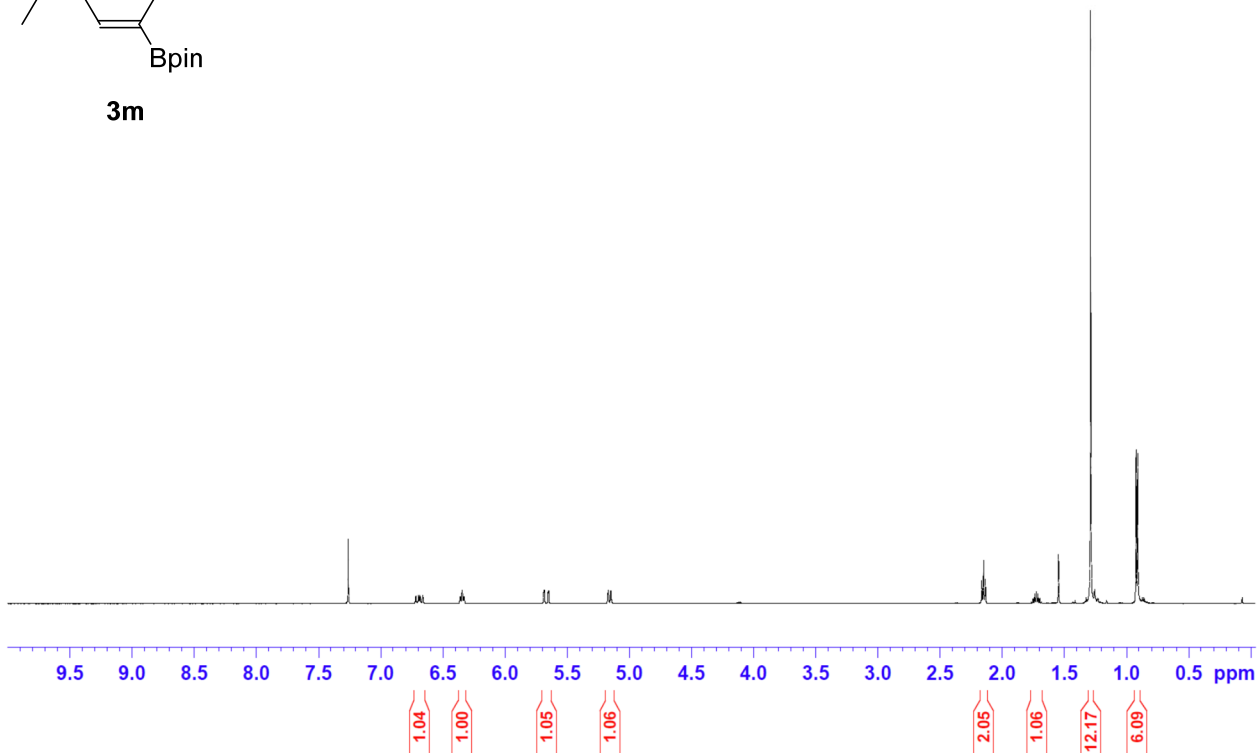

ZWD0107001CLM-C

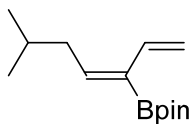

**3m**

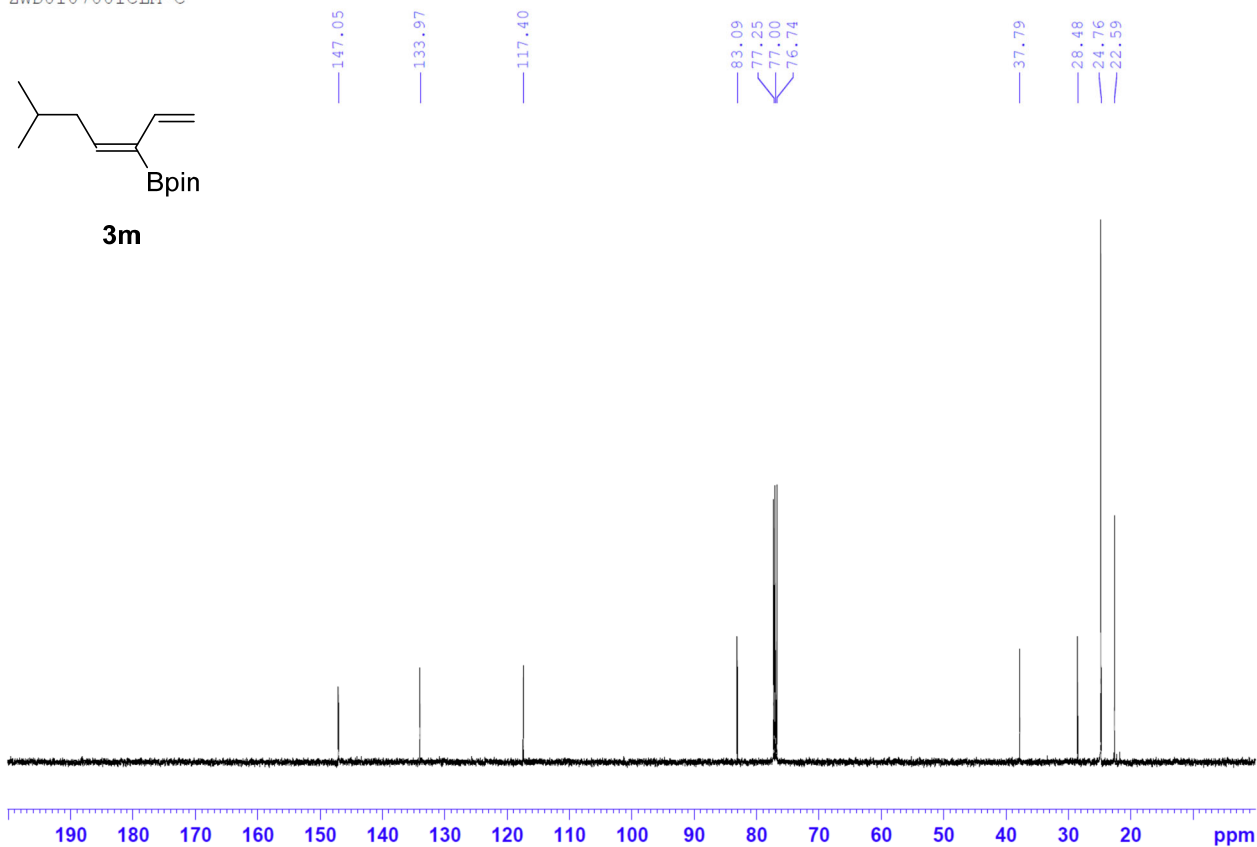

30.51

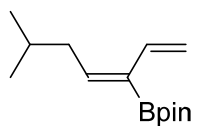

3m

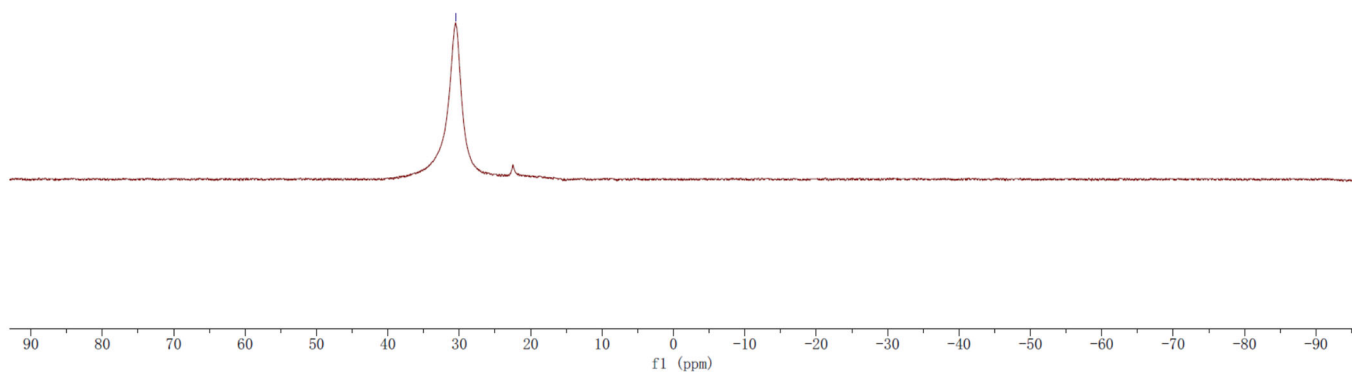

ZWD0109001-2

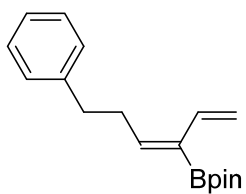

3n

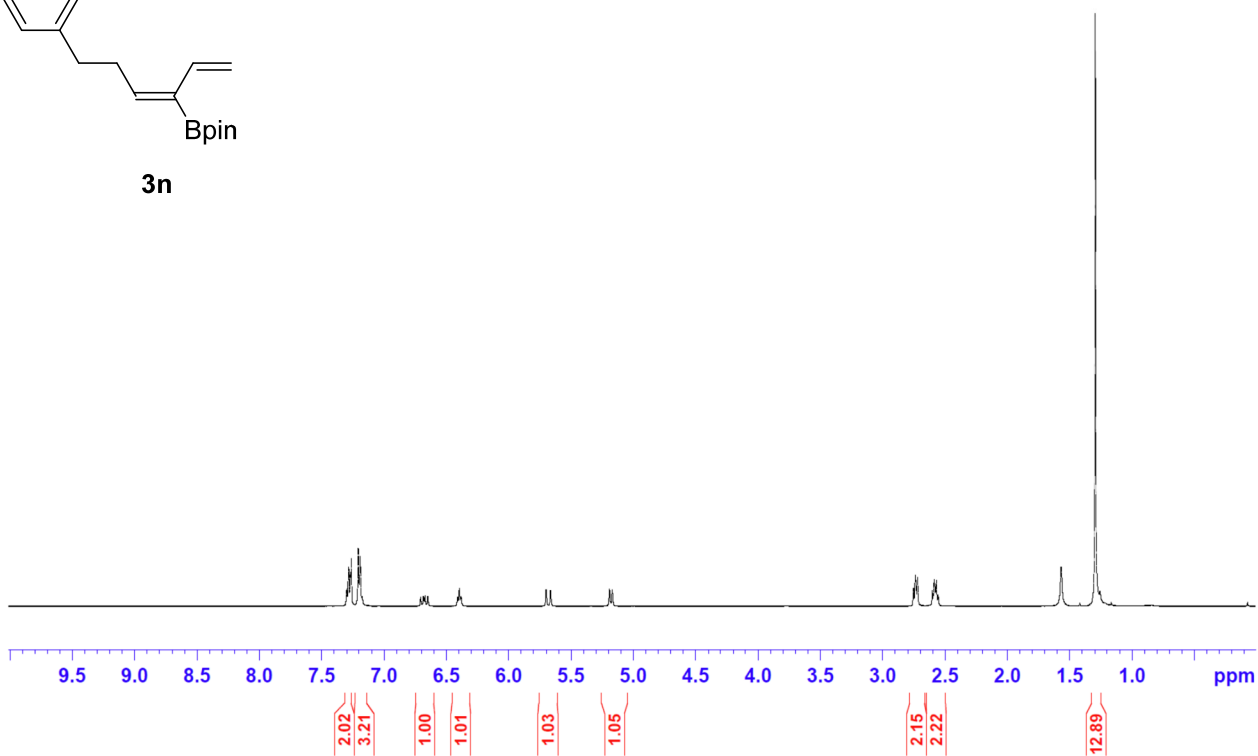

ZWD0109001-C

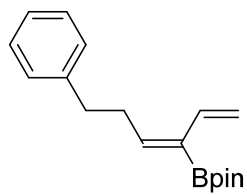

146.53  
141.82  
133.55  
128.33  
128.28  
125.86  
117.95

83.21  
77.25  
77.00  
76.74

35.30  
30.77  
24.75

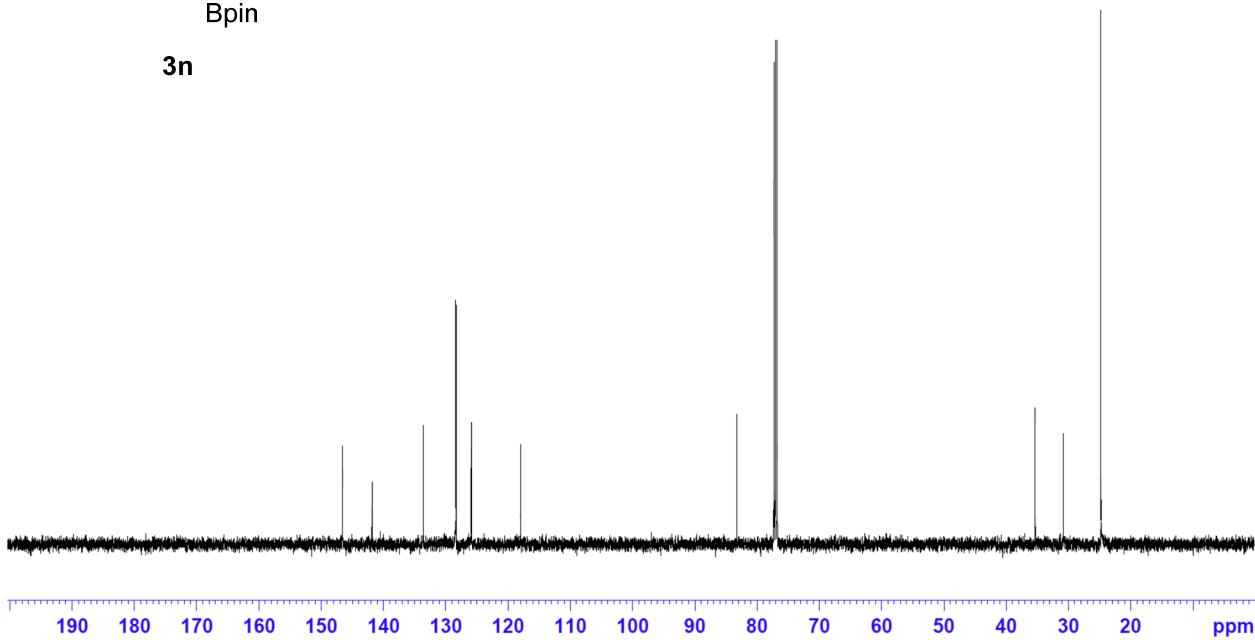

Nov20-2021-ZWD-109-B. 1. f1d

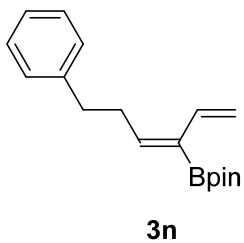

30.64

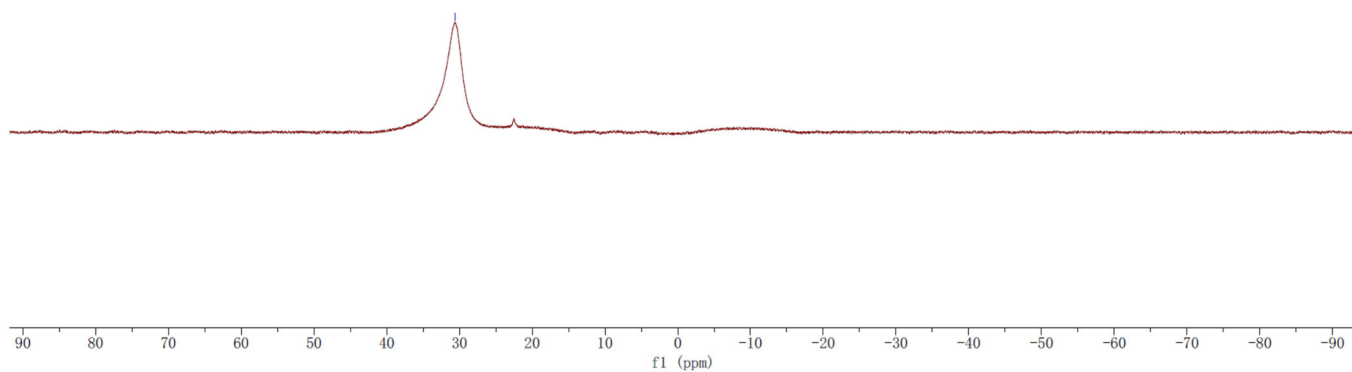

ZWD0153001CLM

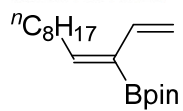

**3o**

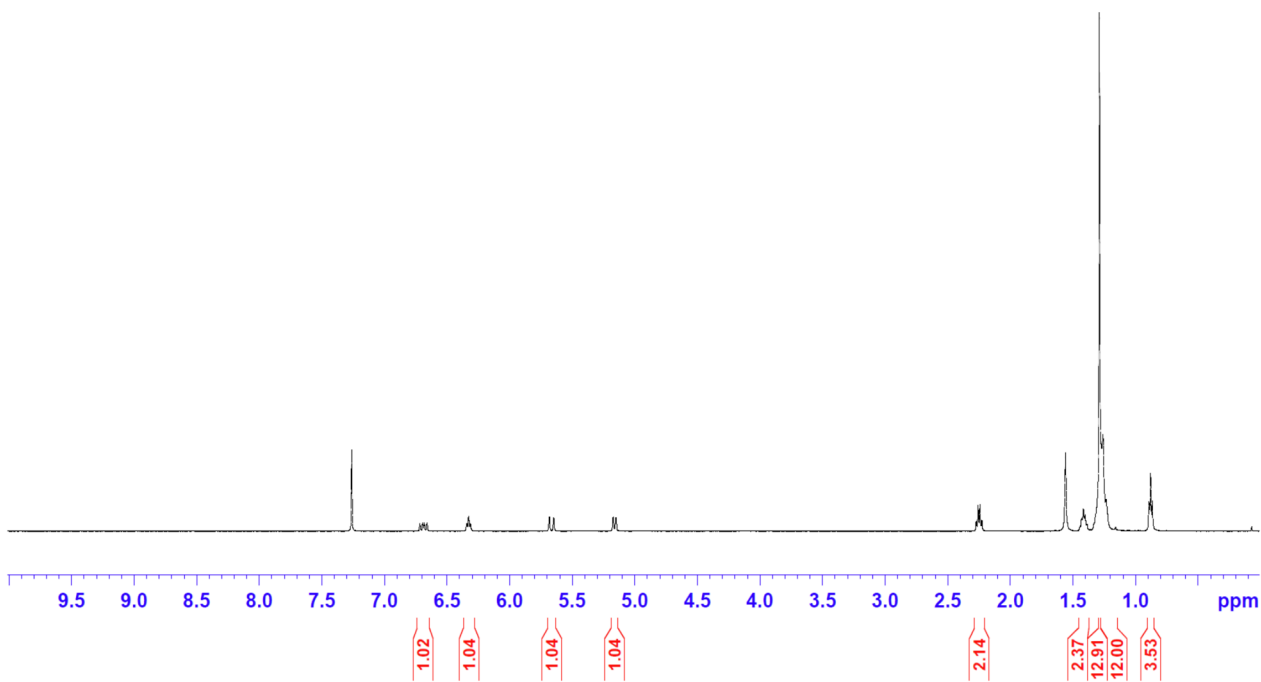

ZJY0017001CLM

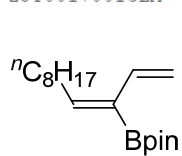

**3o**

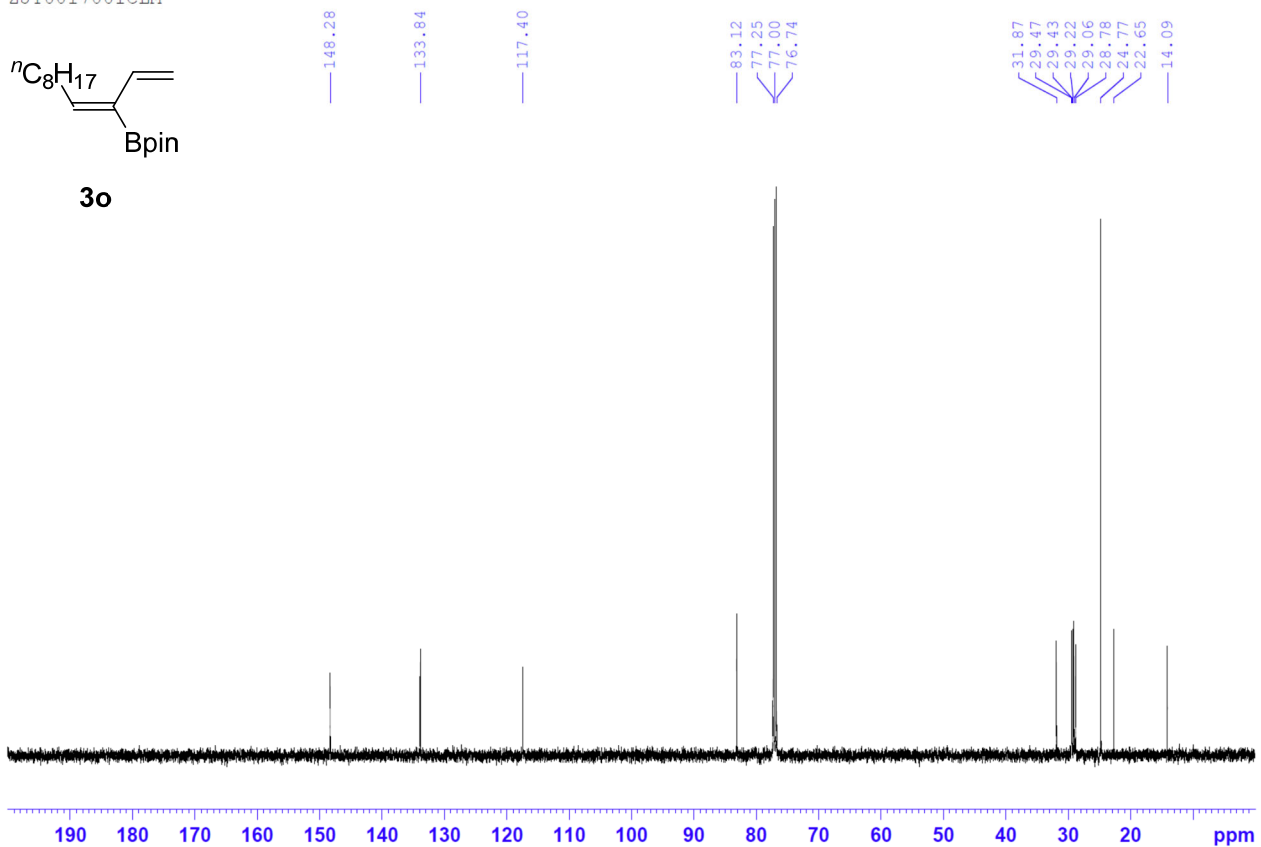



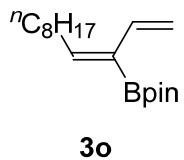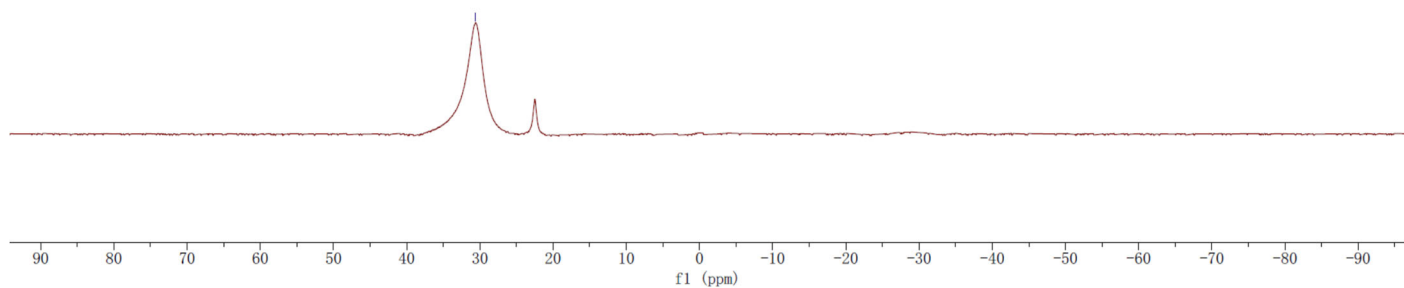

ZWD0143001CLM

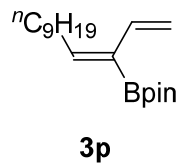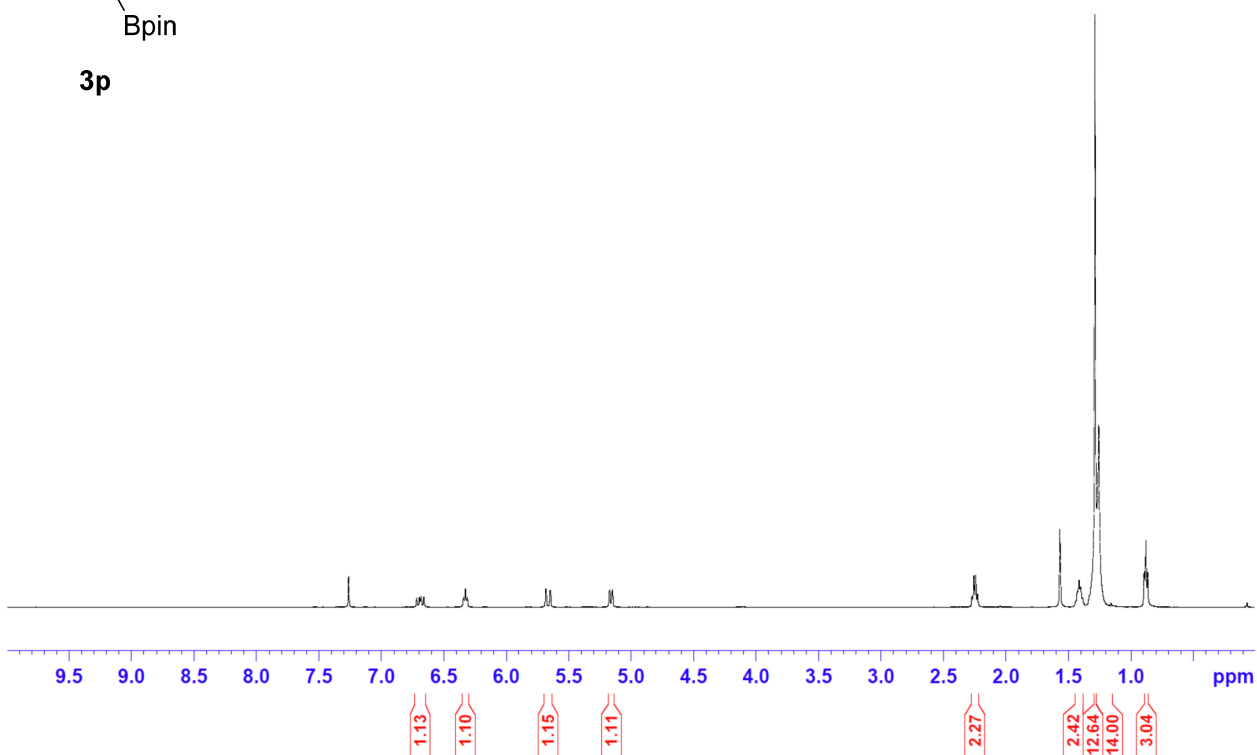

ZWD0143001-C

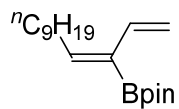

3p

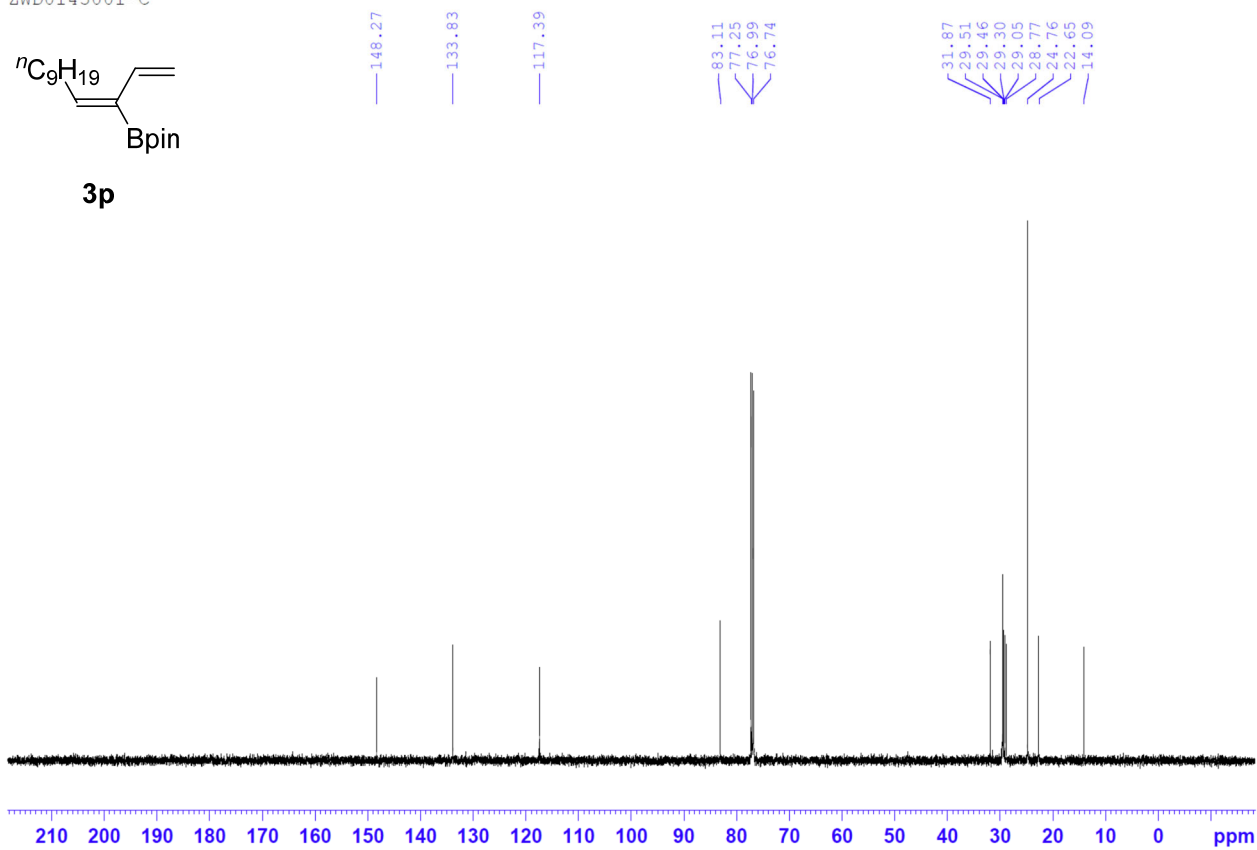

Nov20-2021-ZWD-143-B. 1. f1d

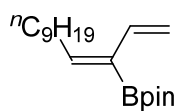

3p

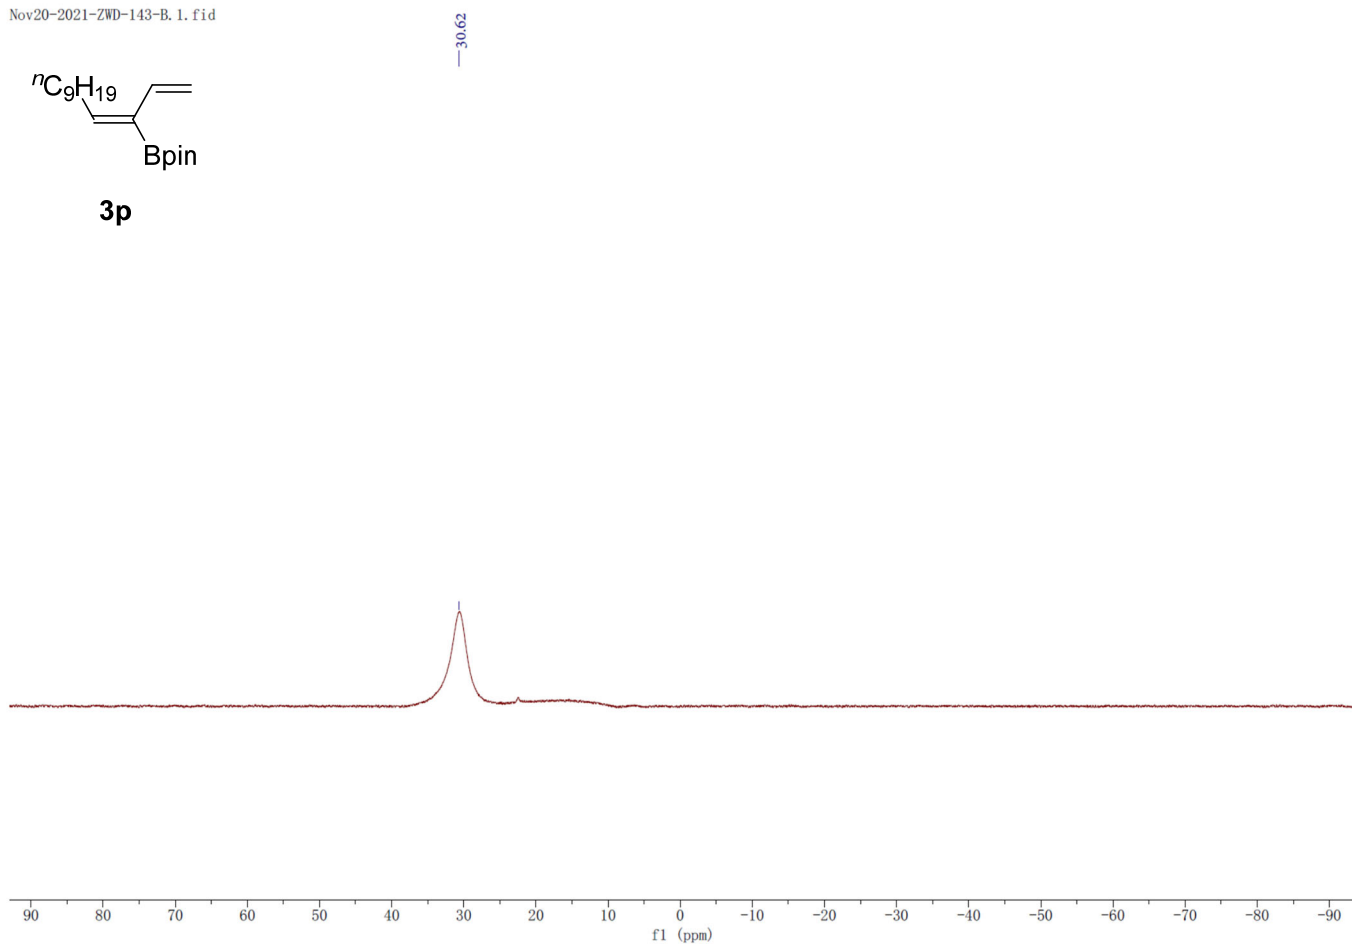

ZWD0042040-CLM3

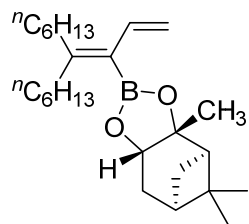

3ab

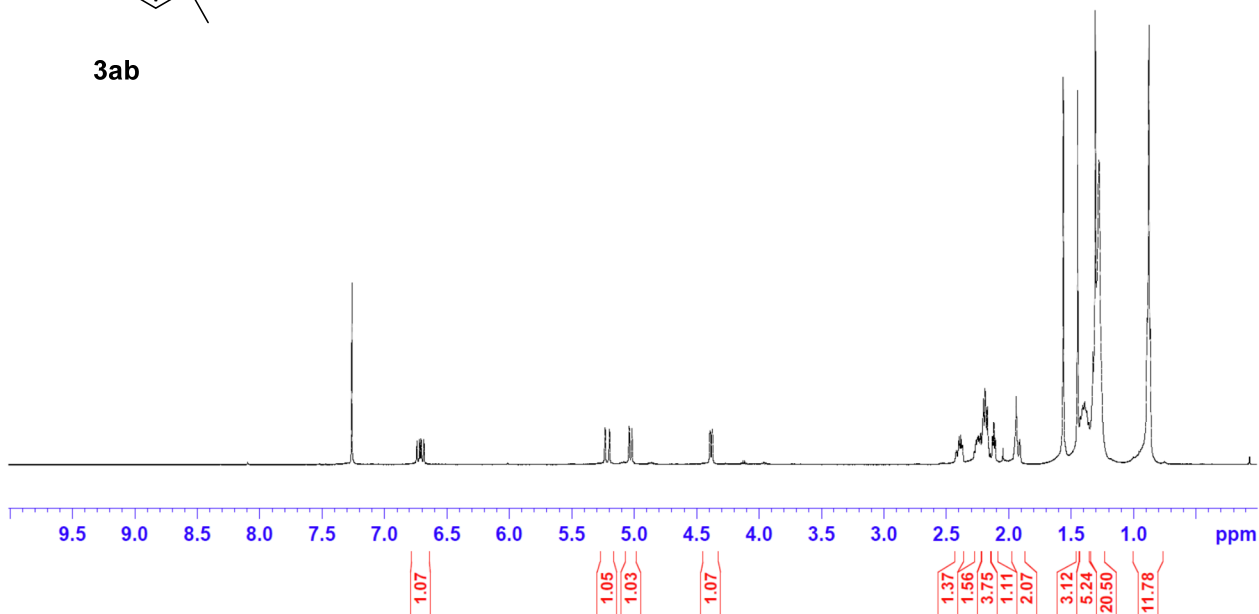

ZWD0042040-3-C

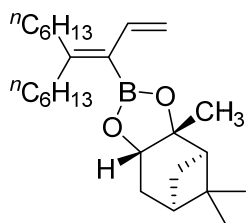

3ab

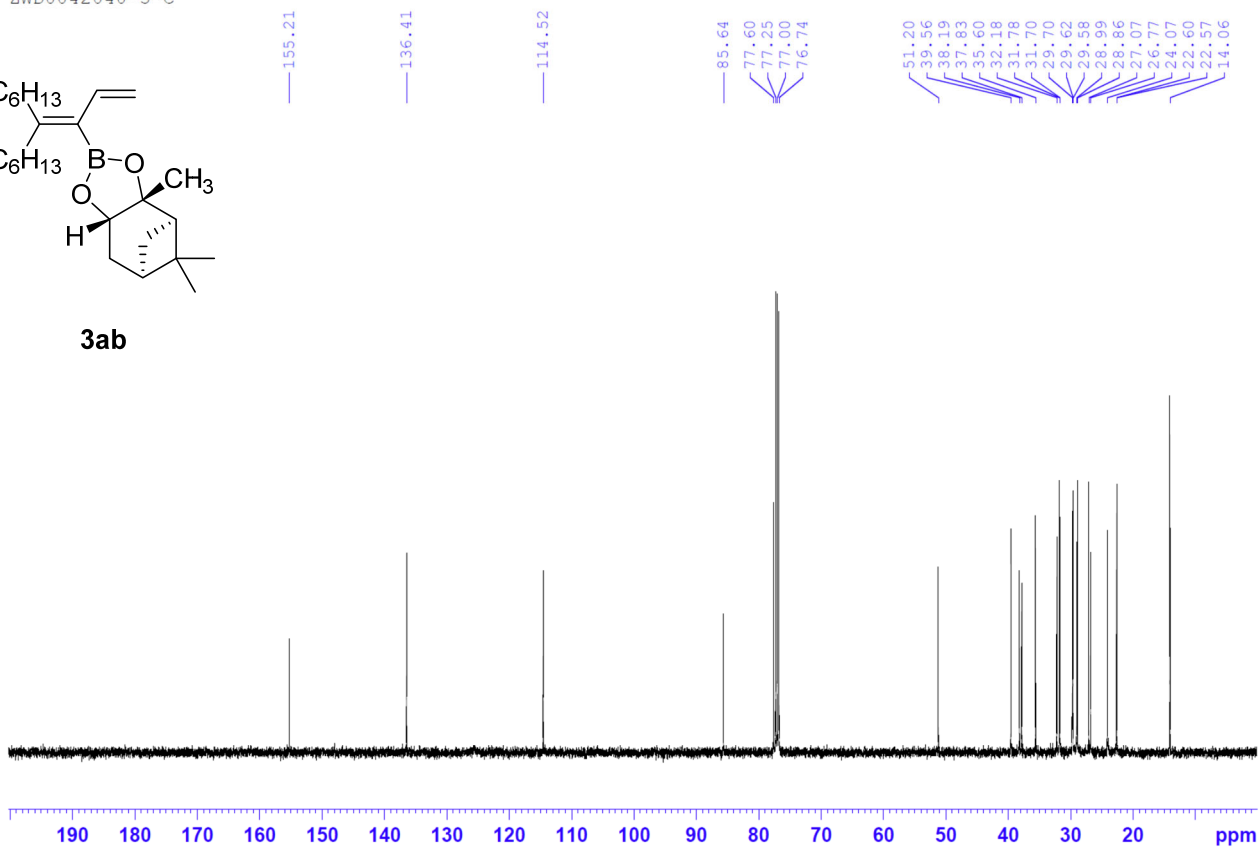

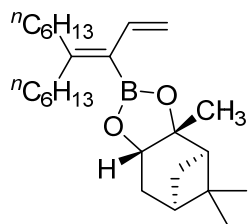

3ab

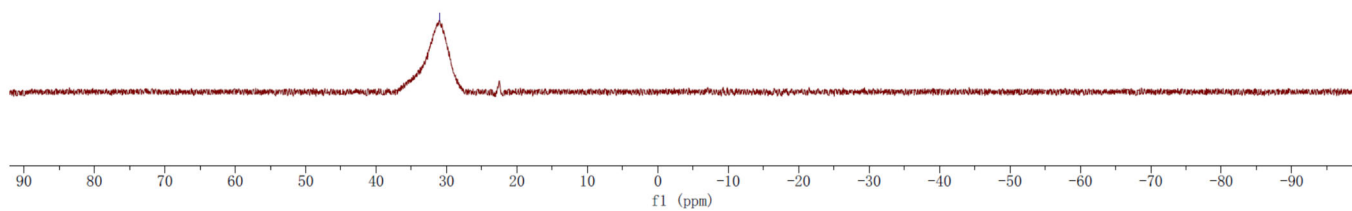

ZWD0042050CLM

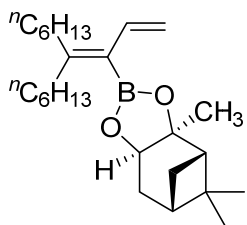

3ac

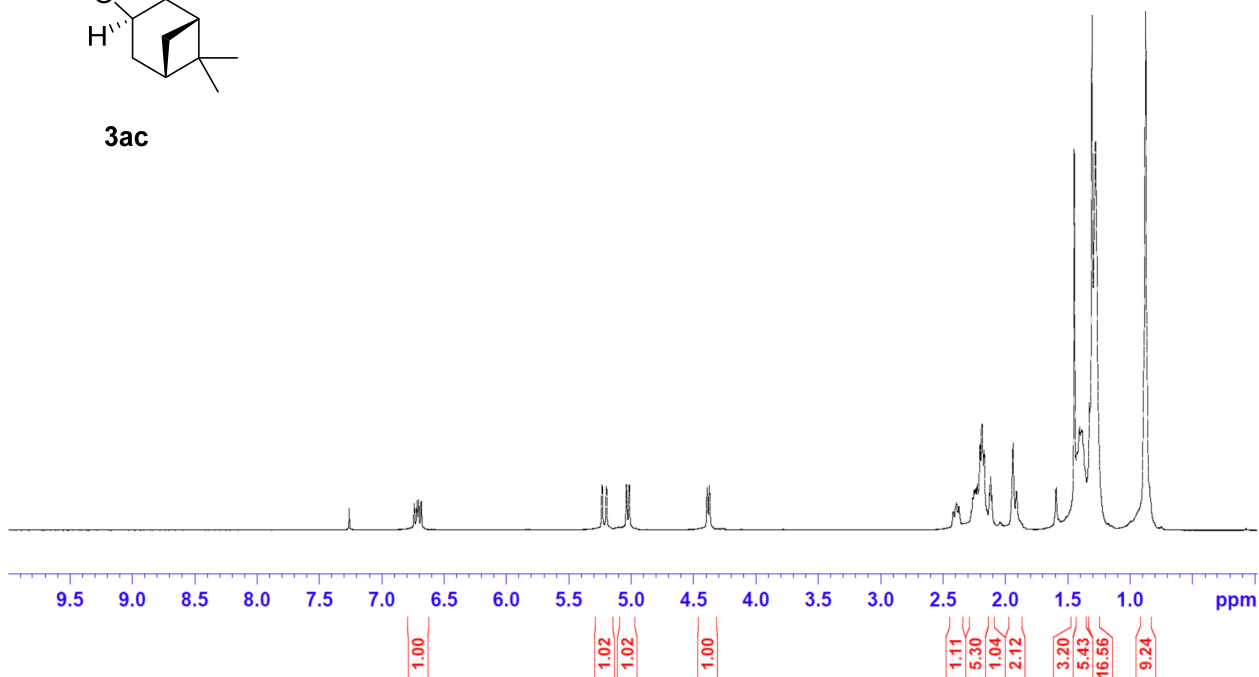

ZWD0042050-C-2

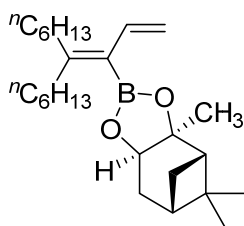

3ac

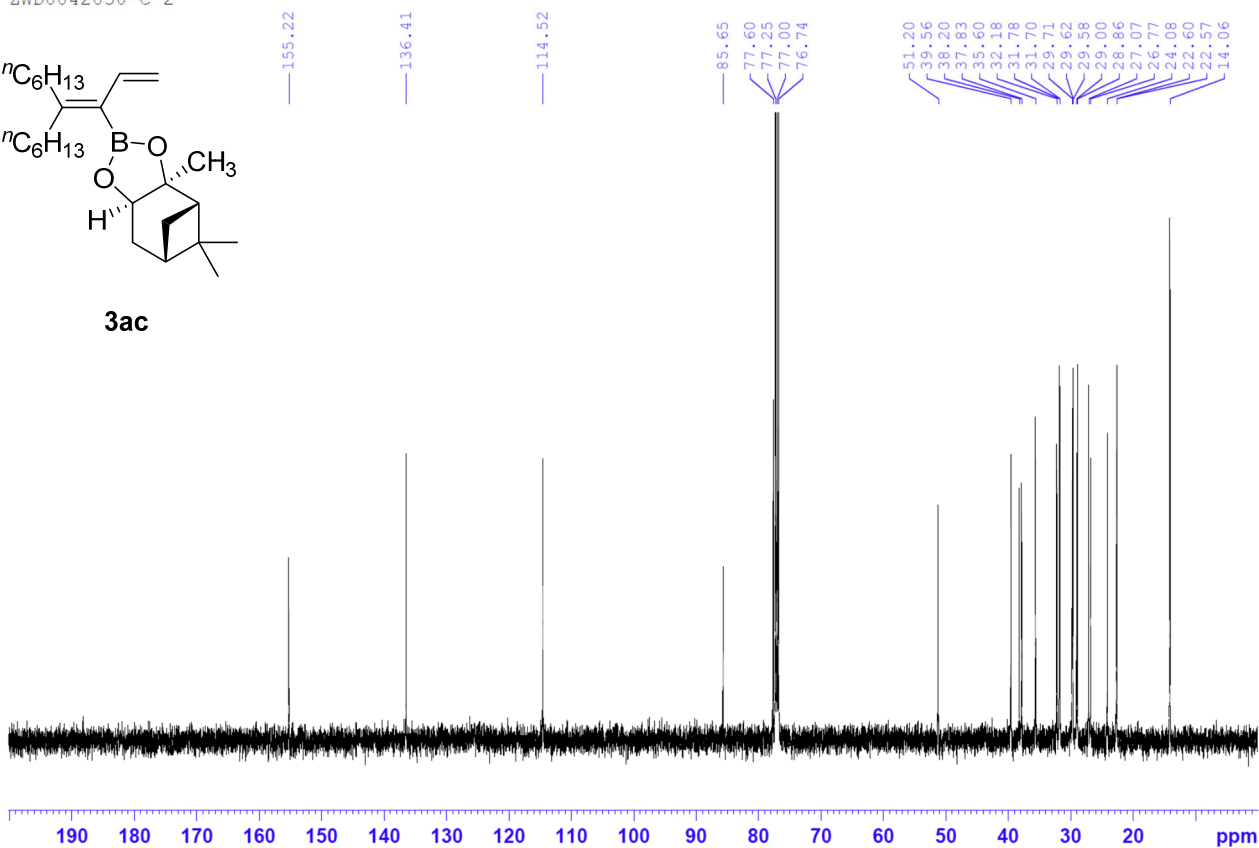

Nov14-2021-ZWD-42-50-B, 10, fid

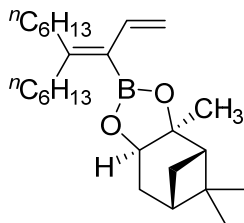

3ac

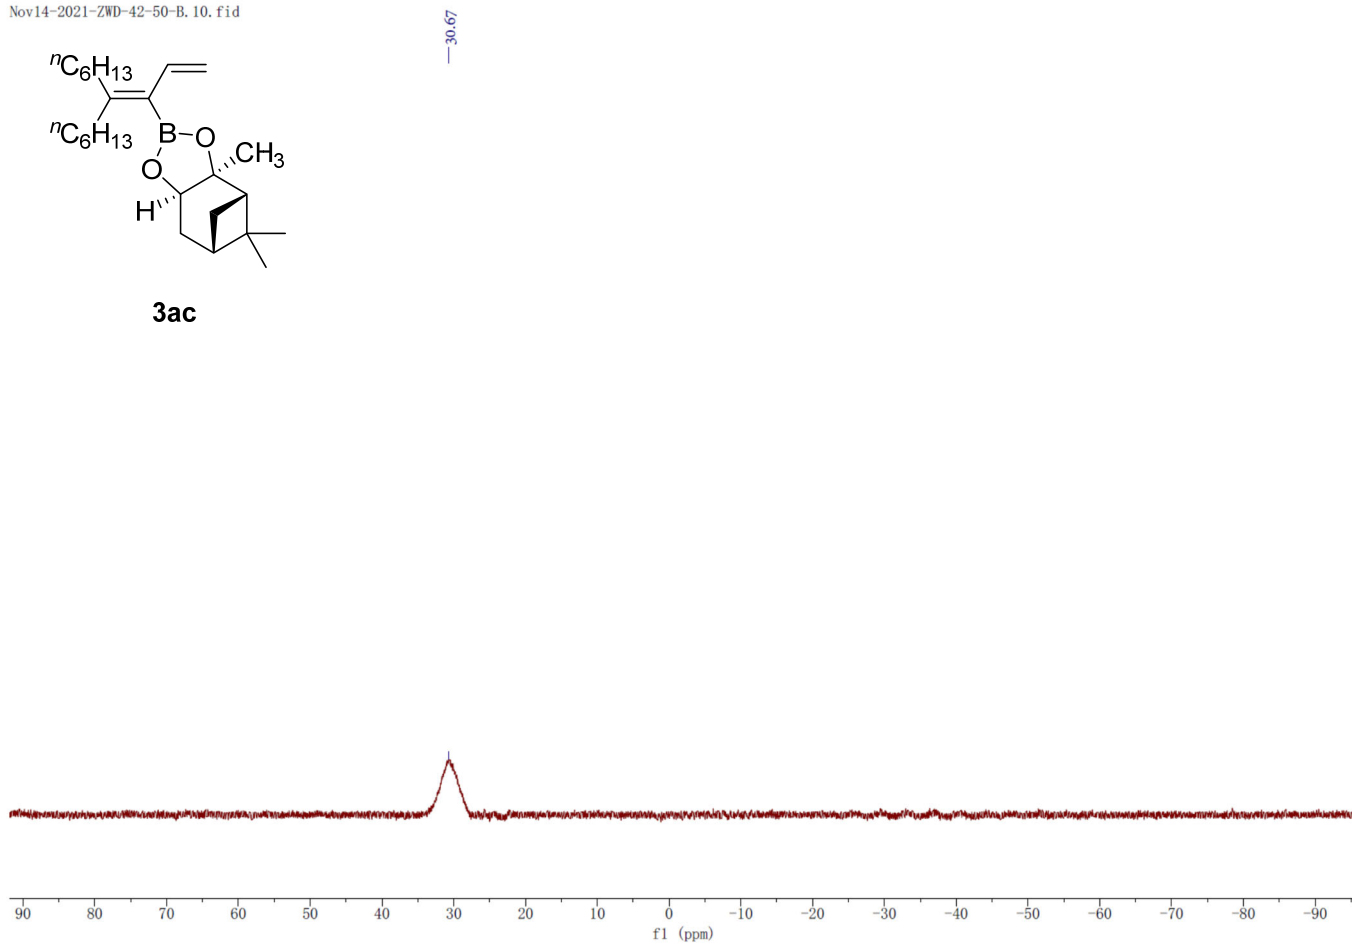

ZWD0042051CLM-2

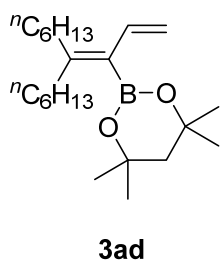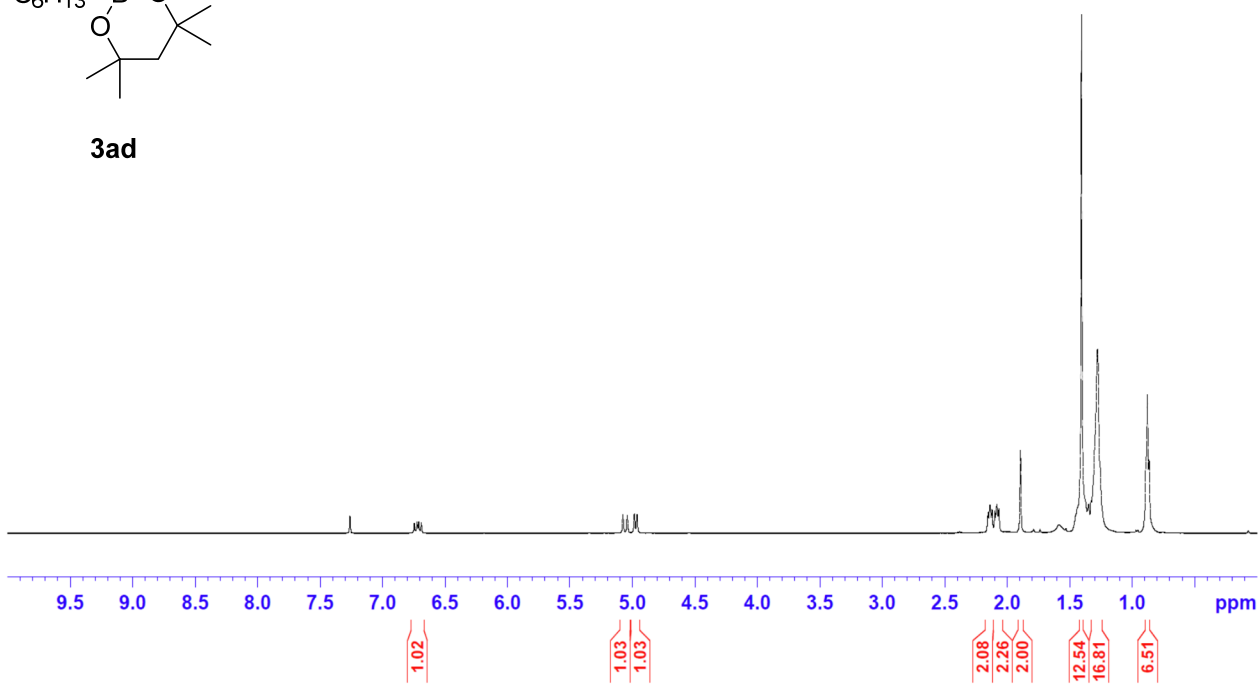

ZWD0042051-C

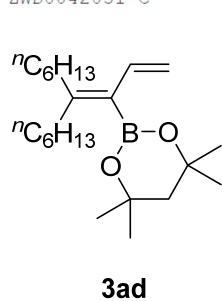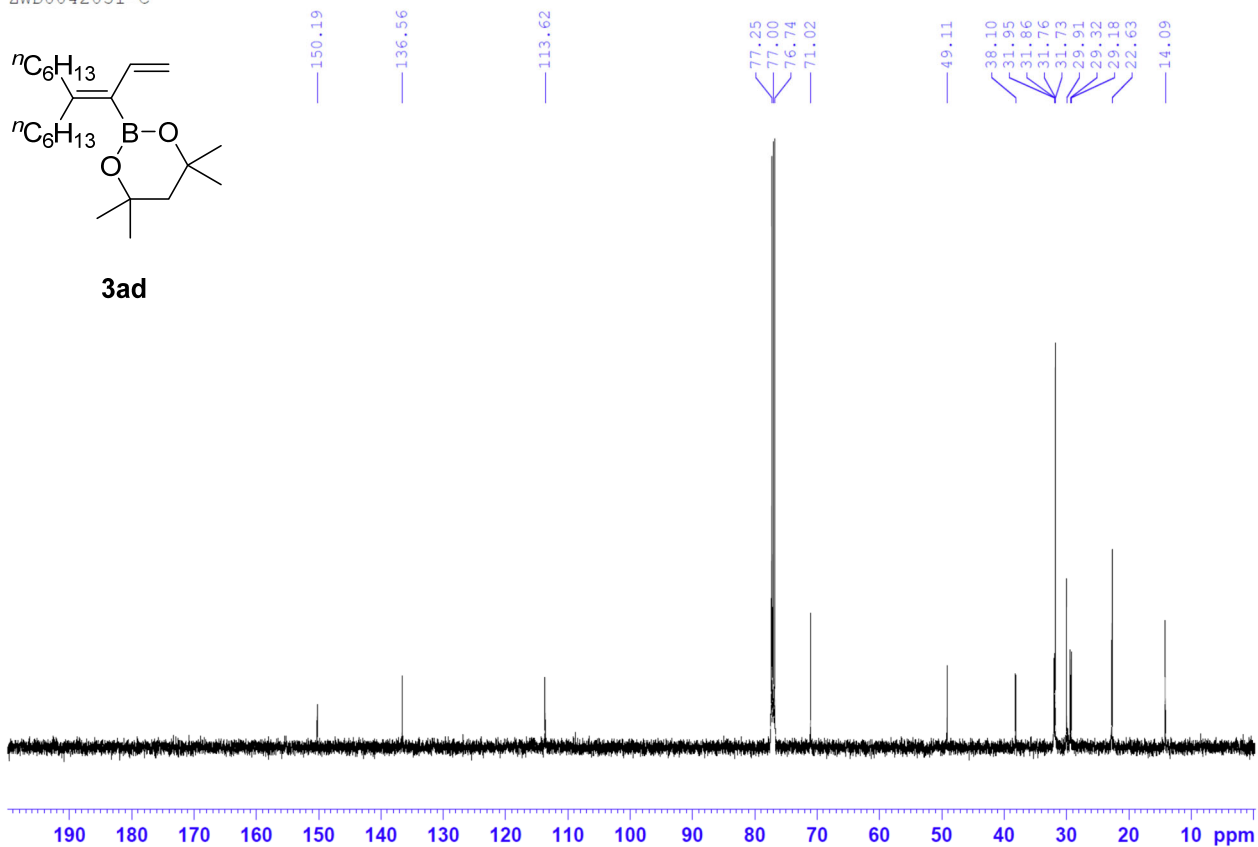

—28.64

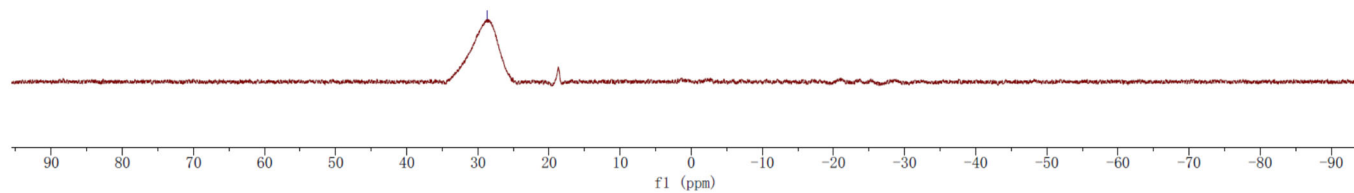

Supplement: d1cc05854a1.pdf [file d1cc05854a1.pdf]
